# Supplementary material for: Iron-catalyzed regioselective protoboration of alkenes on N-heterocycles
Source: Royal Society of Chemistry journal article supplement (doi:10.1039/d2qo01293f), 2022-01-01

# **Iron-Catalyzed Regioselective Protoboration of Alkene on *N*-heterocycles**

Chenchen Zou,<sup>a</sup> and Chun Zhang<sup>\*,a,b</sup>

- a. Institute of Molecular Plus, Tianjin Key Laboratory of Molecular Optoelectronic Science, Department of Chemistry, School of Science, Tianjin University, Weijin Rd. 92, Tianjin 300072, China.
- b. Haihe Laboratory of Sustainable Chemical Transformations, Tianjin 300192, China.

E-mail: chunzhang@tju.edu.cn

## Supporting Information

|                                                |     |
|------------------------------------------------|-----|
| 1. General information                         | S3  |
| 2. Synthesis of substrates                     | S4  |
| 3. The effect of different reaction conditions | S10 |
| 4. General procedure for the reaction          | S14 |
| 5. The effect of substituent electricity       | S15 |
| 6. Unsuccessful substrates                     | S17 |
| 7. Radical trapping experiments                | S18 |
| 8. Analytical data for compounds               | S19 |
| 9. Further transformations of the product      | S30 |
| 10. References                                 | S34 |
| 11. NMR spectra of products                    | S35 |

## 1. General Considerations

All manipulations were conducted with Schlenk tube.  $^1\text{H}$ -NMR spectras were recorded on BrukerAVIII-400 spectrometers, JNM-ECZ400S/L1 and JNM-ECZ600R/S1 spectrometers. Chemical shifts (in ppm) were referenced to Chloroform-d ( $\delta = 7.26$  ppm) in Chloroform-d as an internal standard. Data werereported as follows: chemical shift (ppm), multiplicity (s = singlet, d = doublet, t =triplet, q = quartet, dd = doublet of doublets, m = multiplet), coupling constants (Hz), integration and assignment. $^{13}\text{C}$ -NMR spectras were obtained by using the same NMR spectrometers and were calibrated by Chloroform-d ( $\delta = 77.00$  ppm).  $^{19}\text{F}$ -NMR spectra were obtained by the same NMR. High resolution mass spectrometry (HRMS) data were obtained on a QTOF mass analyzer with electrospray ionization (ESI) through a Waters Acquity UPLC Class I/Xevo G2 Q-Tof. HPLC data were collected on a Shimadzu LC-2030 spectrometer. Melting points were measured on a WRS-1A digital melting point apparatus and are uncorrected. Substrates were purchased from Aldrich, TCI, Acros, Energy, Aladdin, or synthesized according to the procedures outlined below. THF was distilled from sodium benzophenone prior to use. Unless otherwise noted, materials obtained from commercial suppliers were used without further purification. For the heating reaction, the heat source is an oil bath.

## 2. Synthesis of Substrates

### 2.1 Synthesis of 1,2-Dihydroquinoline

These substrates were prepared according to the corresponding literature reports. Analytical data ( $^1\text{H}$  NMR,  $^{13}\text{C}$  NMR) matches with the literature.<sup>[1,2]</sup>

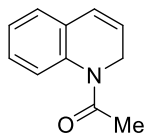

**1a**

1-(quinolin-1(2H)-yl)ethan-1-one

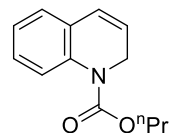

**1b**

propyl quinoline-1(2H)-carboxylate

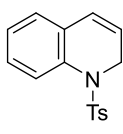

**1c**

1-tosyl-1,2-dihydroquinoline

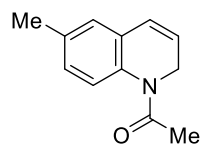

**1d**

1-(6-methylquinolin-1(2H)-yl)ethan-1-one

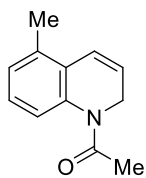

**1e**

1-(5-methylquinolin-1(2H)-yl)ethan-1-one

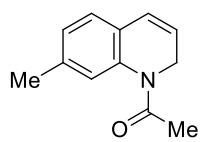

**1f**

1-(7-methylquinolin-1(2H)-yl)ethan-1-one

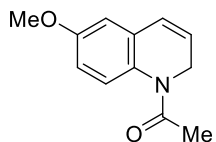

**1g**

1-(6-methoxyquinolin-1(2H)-yl)ethan-1-one

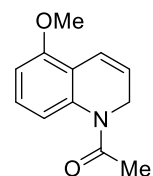

**1h**

1-(5-methoxyquinolin-1(2H)-yl)ethan-1-one

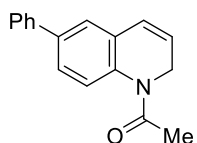

**1i**

1-(6-phenylquinolin-1(2H)-yl)ethan-1-one

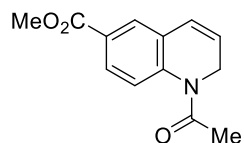

**1j**

methyl 1-acetyl-1,2-dihydroquinoline-6-carboxylate

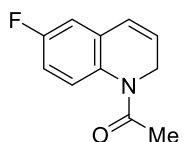

**1k**

1-(6-fluoroquinolin-1(2H)-yl)ethan-1-one

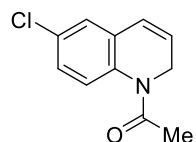

**1l**

1-(6-chloroquinolin-1(2H)-yl)ethan-1-one

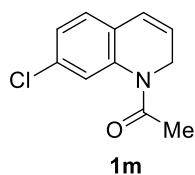

1-(7-chloroquinolin-1(2H)-yl)ethan-1-one

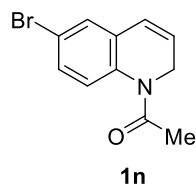

1-(6-bromoquinolin-1(2H)-yl)ethan-1-one

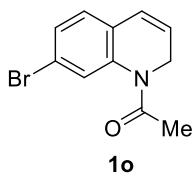

1-(7-bromoquinolin-1(2H)-yl)ethan-1-one

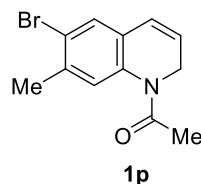

1-(6-bromo-7-methylquinolin-1(2H)-yl)ethan-1-one

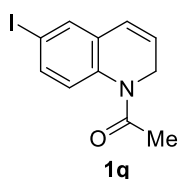

1-(6-iodoquinolin-1(2H)-yl)ethan-1-one

**1e, 1i, 1j, 1m, 1p, and 1q** were synthesized according to the literature. ( General procedure A)<sup>[2]</sup>

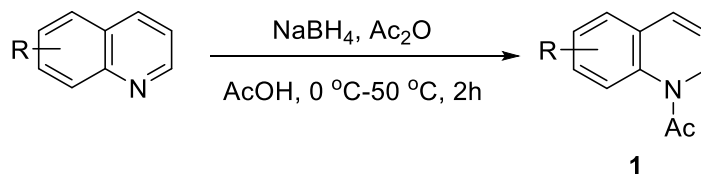

Sodium borohydride (3.01 g, 80.0 mmol) was added portionwise to a mixture of quinoline (2.47 g, 19.1 mmol), acetic anhydride (10.2 mL) and acetic acid (31.0 mL) at 0 °C. After the addition of complete, the mixture was warmed to 50 °C for 30 min. The reaction mixture was concentrated under vacuum, diluted with water and neutralized with aqueous Na<sub>2</sub>CO<sub>3</sub>. This was then extracted with CH<sub>2</sub>Cl<sub>2</sub> three times and the organic extract was dried over anhydrous MgSO<sub>4</sub> and concentrated under reduced pressure. The crude mixture was purified by flash column chromatography (ethyl acetate : petroleum ether = 1 : 3), followed by bulb-to-bulb distillation to give the corresponding 1,2-dihydroquinoline **1** (1.22 g, 7.0 mmol, 37%) as a colorless oil. The 1,2-dihydropyridines were immediately used in the next borylation reaction in order to prevent decomposition.

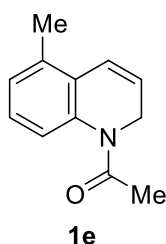

**1-(5-methylquinolin-1(2H)-yl)ethan-1-one (1e)**. The general procedure A was followed using 5-methylquinoline (0.72 g, 5.0 mmol, 1.0 equiv.). Purification of this material by chromatography

on silica gel (ethyl acetate : petroleum ether = 1 : 3) afforded product **1e** as a colorless oil (0.69 g , 74 % yield):  $R_f = 0.4$  (ethyl acetate : petroleum ether = 1 : 2);  $^1\text{H NMR}$  ( $\text{CDCl}_3$ , 400 MHz)  $\delta$ : 7.10 (t,  $J = 7.7$  Hz, 1H), 7.01 (d,  $J = 7.8$  Hz, 2H), 6.71 (d,  $J = 9.7$  Hz, 1H), 6.15 (dt,  $J = 9.7, 4.2$  Hz, 1H), 4.50-4.35 (m, 2H), 2.34 (s, 3H), 2.17 (s, 3H);  $^{13}\text{C NMR}$  ( $\text{CDCl}_3$ , 101 MHz)  $\delta$ : 169.9, 137.0, 133.9, 127.9, 127.5, 127.2, 126.4, 123.1, 121.7, 40.6, 22.2, 18.8 ppm; **HRMS** (ESI-TOF)  $m/z$  calcd for  $\text{C}_{12}\text{H}_{14}\text{NO}$  ( $\text{M} + \text{H}$ ) $^+$ : 188.1075, found 188.1083.

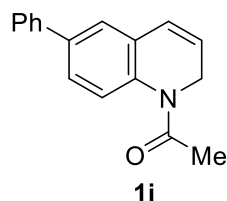

**1-(6-phenylquinolin-1(2H)-yl)ethan-1-one (1i).** The general procedure A was followed using 6-phenylquinoline (1.03 g, 5.0 mmol, 1.0 equiv.). Purification of this material by chromatography on silica gel (ethyl acetate : petroleum ether = 1 : 3) afforded product **1i** as a colorless oil (0.84 g , 67 % yield):  $R_f = 0.4$  (ethyl acetate : petroleum ether = 1 : 2);  $^1\text{H NMR}$  ( $\text{CDCl}_3$ , 400 MHz)  $\delta$ : 7.60-7.55 (m, 2H), 7.47-7.42 (m, 3H), 7.39-7.18 (m, 3H), 6.59 (d,  $J = 9.5$  Hz, 1H), 6.13 (dt,  $J = 8.8, 4.0$  Hz, 1H), 4.49 (s, 2H), 2.26 (s, 3H);  $^{13}\text{C NMR}$  ( $\text{CDCl}_3$ , 101 MHz)  $\delta$ : 167.0, 140.1, 138.5, 136.2, 128.9, 128.8, 127.4, 126.8, 126.2, 125.6, 125.0, 124.0, 41.6, 29.3, 22.5 ppm; **HRMS** (ESI-TOF)  $m/z$  calcd for  $\text{C}_{17}\text{H}_{16}\text{NO}$  ( $\text{M} + \text{H}$ ) $^+$ : 250.1232, found 250.1242.

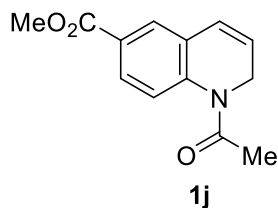

**Methyl 1-acetyl-1,2-dihydroquinoline-6-carboxylate (1k).** The general procedure A was followed using methyl quinoline-6-carboxylate (0.94 g, 5.0 mmol, 1.0 equiv.). Purification of this material by chromatography on silica gel (ethyl acetate : petroleum ether = 1 : 3) afforded product **1k** as a colorless oil (0.52 g , 45 % yield):  $R_f = 0.4$  (ethyl acetate : petroleum ether = 1 : 2);  $^1\text{H NMR}$  ( $\text{CDCl}_3$ , 400 MHz)  $\delta$ : 7.88 (dd,  $J = 8.4, 2.0$  Hz, 1H), 7.78 (d,  $J = 2.0$  Hz, 1H), 7.32 (s, 1H), 6.57 (d,  $J = 9.6$  Hz, 1H), 6.13 (dt,  $J = 9.4, 4.1$  Hz, 1H), 4.52-4.39 (m, 2H), 3.91 (s, 3H), 2.25 (s, 3H);  $^{13}\text{C NMR}$  ( $\text{CDCl}_3$ , 101 MHz)  $\delta$ : 169.4, 165.7, 140.4, 128.3, 128.0, 127.5, 127.3, 126.4, 125.4, 123.0, 51.7, 41.8, 22.2 ppm; **HRMS** (ESI-TOF)  $m/z$  calcd for  $\text{C}_{13}\text{H}_{14}\text{NO}_3$  ( $\text{M} + \text{H}$ ) $^+$ : 232.0974, found 232.0979.

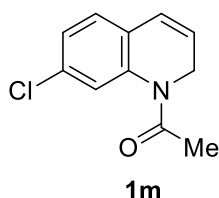

**1-(7-chloroquinolin-1(2H)-yl)ethan-1-one (1m).** The general procedure A was followed using 7-chloroquinoline (0.82 g, 5.0 mmol, 1.0 equiv.). Purification of this material by chromatography on silica gel (ethyl acetate : petroleum ether = 1 : 3) afforded product **1m** as a colorless oil (0.75 g , 72 % yield):  $R_f = 0.4$  (ethyl acetate : petroleum ether = 1 : 2);  $^1\text{H NMR}$  ( $\text{CDCl}_3$ , 400 MHz)  $\delta$ :

7.39-7.04 (m, 2H), 7.02 (d,  $J = 8.1$  Hz, 1H), 6.49 (d,  $J = 9.5$  Hz, 1H), 6.07 (dt,  $J = 9.2, 4.1$  Hz, 1H), 4.40 (s, 2H), 2.22 (s, 3H);  $^{13}\text{C}$  NMR (CDCl<sub>3</sub>, 101 MHz)  $\delta$ : 169.3, 137.5, 131.8, 127.2, 126.9, 125.1, 123.6, 41.4, 22.1 ppm; HRMS (ESI-TOF)  $m/z$  calcd for C<sub>11</sub>H<sub>11</sub>ClNO (M + H)<sup>+</sup>: 208.0529 found 208.0534.

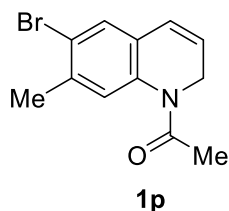

**1-(6-bromo-7-methylquinolin-1(2H)-yl)ethan-1-one (1p).** The general procedure A was followed using 6-bromo-7-methylquinoline (1.11 g, 5.0 mmol, 1.0 equiv.). Purification of this material by chromatography on silica gel (ethyl acetate : petroleum ether = 1 : 3) afforded product **1q** as a colorless oil (0.80 g, 60 % yield):  $R_f = 0.4$  (ethyl acetate : petroleum ether = 1 : 2);  $^1\text{H}$  NMR (CDCl<sub>3</sub>, 400 MHz)  $\delta$ : 7.28 (s, 2H), 6.45 (d,  $J = 9.5$  Hz, 1H), 6.08 (dt,  $J = 8.9, 4.0$  Hz, 1H), 4.42 (s, 2H), 2.39 (s, 3H), 2.21 (s, 3H);  $^{13}\text{C}$  NMR (CDCl<sub>3</sub>, 101 MHz)  $\delta$ : 169.7, 136.5, 136.0, 129.6, 128.5, 125.9, 125.0, 120.9, 41.2, 23.0, 22.4 ppm; HRMS (ESI-TOF)  $m/z$  calcd for C<sub>12</sub>H<sub>13</sub>BrNO (M + H)<sup>+</sup>: 266.0181, found 266.0184.

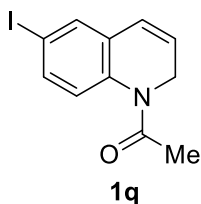

**1-(6-iodoquinolin-1(2H)-yl)ethan-1-one (1q).** The general procedure A was followed using 6-iodoquinoline (1.28 g, 5.0 mmol, 1.0 equiv.). Purification of this material by chromatography on silica gel (ethyl acetate : petroleum ether = 1 : 3) afforded product **1q** as a colorless oil (0.96 g, 64 % yield):  $R_f = 0.4$  (ethyl acetate : petroleum ether = 1 : 2);  $^1\text{H}$  NMR (CDCl<sub>3</sub>, 400 MHz)  $\delta$ : 7.51 (dd,  $J = 8.4, 2.0$  Hz, 1H), 7.43 (d,  $J = 1.9$  Hz, 1H), 6.92 (s, 1H), 6.44 (d,  $J = 9.6$  Hz, 1H), 6.12 (dt,  $J = 8.9, 4.0$  Hz, 1H), 4.43 (s, 2H), 2.20 (s, 3H);  $^{13}\text{C}$  NMR (CDCl<sub>3</sub>, 101 MHz)  $\delta$ : 169.5, 136.4, 135.6, 134.8, 131.0, 129.1, 125.5, 125.0, 89.3, 41.4, 22.3 ppm; HRMS (ESI-TOF)  $m/z$  calcd for C<sub>11</sub>H<sub>11</sub>INO (M + H)<sup>+</sup>: 299.9885, found 299.9895.

## 2.2 Synthesis of 1,2-Dihydropyridine

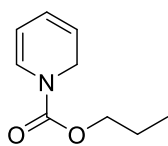

**3a**

propyl pyridine-1(2*H*)-carboxylate

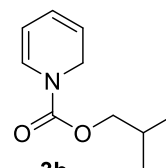

**3b**

isobutyl pyridine-1(2*H*)-carboxylate

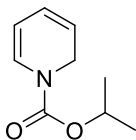

**3c**

isopropyl pyridine-1(2*H*)-carboxylate

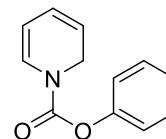

**3d**

phenyl pyridine-1(2*H*)-carboxylate

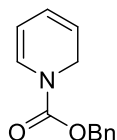

**3e**

benzyl pyridine-1(2*H*)-carboxylate

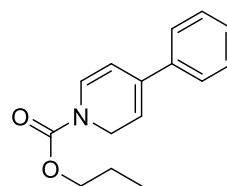

**3f**

propyl 4-phenylpyridine-1(2*H*)-carboxylate

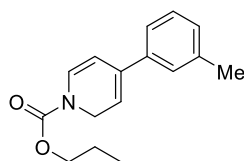

**3g**

propyl 4-(*m*-tolyl)pyridine-1(2*H*)-carboxylate

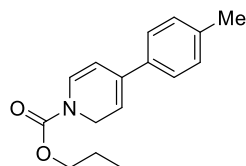

**3h**

propyl 4-(*p*-tolyl)pyridine-1(2*H*)-carboxylate

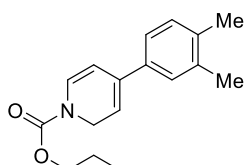

**3i**

propyl 4-(3,4-dimethylphenyl)pyridine-1(2*H*)-carboxylate

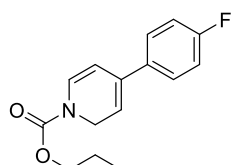

**3j**

propyl 4-(4-fluorophenyl)pyridine-1(2*H*)-carboxylate

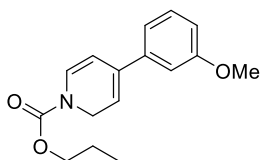

**3k**

propyl 4-(3-methoxyphenyl)pyridine-1(2*H*)-carboxylate

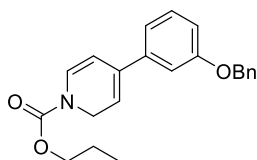

**3l**

propyl 4-(3-(benzyloxy)phenyl)pyridine-1(2*H*)-carboxylate

The 4-arylpyridines were synthesized through the standard Suzuki-Miyaura coupling reaction of 4-bromopyridine and the corresponding arylboronic acids according to the literature procedure. (General procedure B)<sup>[3]</sup>



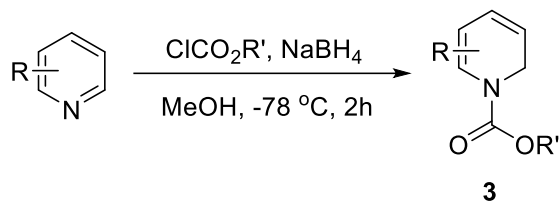

Chloroformate (30.0 mmol, 1.0 equiv.) was added dropwise under nitrogen to a MeOH solution (100.0 mL) of NaBH<sub>4</sub> (567.0 mg, 15.0 mmol, 0.5 equiv.), pyridine (2.4 mL, 30.0 mmol, 1.0 equiv.) at -78 °C. The reaction was maintained at -78 °C for 2 h and then quenched by water. The mixture was extracted with CH<sub>2</sub>Cl<sub>2</sub> three times. The combined organic layer was then dried over MgSO<sub>4</sub> and concentrated under reduced pressure. The crude mixture was purified by a short pad of silica gel with ethyl acetate : petroleum ether (1 : 20) as an eluent. The solvent was removed by evaporation under reduced pressure to obtain **3** as a clear liquid, which was immediately used in the next borylation reaction in order to prevent decomposition.

### 3. The effect of different reaction conditions

Table S1. The effect of different bases.<sup>a</sup>

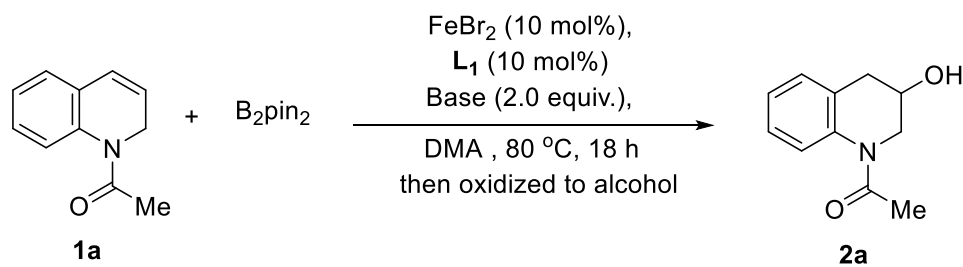

| Entry | Bases      | Yield (%) <sup>b</sup> |
|-------|------------|------------------------|
| 1     | $LiO^tBu$  | 87                     |
| 2     | $NaO^tBu$  | 51                     |
| 3     | $KO^tBu$   | 75                     |
| 4     | $Li_2CO_3$ | trace                  |
| 5     | $LiOMe$    | 60                     |
| 6     | $LiOAc$    | 0                      |

<sup>a</sup> Standard conditions: **1a** (0.2 mmol),  $B_2pin_2$  (0.4 mmol),  $FeBr_2$  (0.02 mmol),  $L_1$  (0.02 mmol), Base (0.4 mmol), DMA (1.0 mL), at 80 °C for 18 h. Then  $NaBO_3 \cdot 4H_2O$  (0.6 mmol), THF (2 mL),  $H_2O$  (2 mL), 25 °C, 3 h.

<sup>b</sup> isolated yield.

Table S2. The effect of different [Fe]-salts. <sup>a</sup>

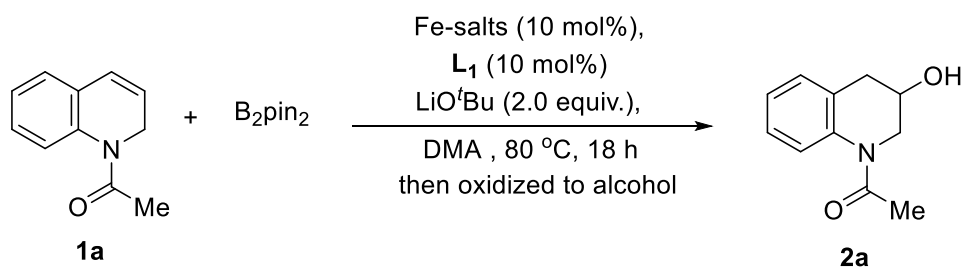

| Entry | Fe-salts              | Yield (%) <sup>b</sup> |
|-------|-----------------------|------------------------|
| 1     | FeBr <sub>2</sub>     | 87                     |
| 2     | FeBr <sub>3</sub>     | 58                     |
| 3     | FeCl <sub>3</sub>     | 70                     |
| 4     | Fe(acac) <sub>2</sub> | 0                      |
| 5     | FeCl <sub>2</sub>     | 74                     |
| 6     | Fe(OTs) <sub>2</sub>  | 68                     |
| 7     | Fe(OTs) <sub>3</sub>  | 43                     |
| 8     | Fe(acac) <sub>3</sub> | 47                     |

<sup>a</sup> Standard conditions: **1a** (0.2 mmol), B<sub>2</sub>pin<sub>2</sub> (0.4 mmol), Fe-salts (0.02 mmol), **L**<sub>1</sub> (0.02 mmol), LiO<sup>t</sup>Bu (0.4 mmol), DMA (1.0 mL), at 80 °C for 18 h. Then NaBO<sub>3</sub>·4H<sub>2</sub>O (0.6 mmol), THF (2 mL), H<sub>2</sub>O (2 mL), 25 °C, 3 h. <sup>b</sup> isolated yield.

Table S3. The effect of different ligands.<sup>a</sup>

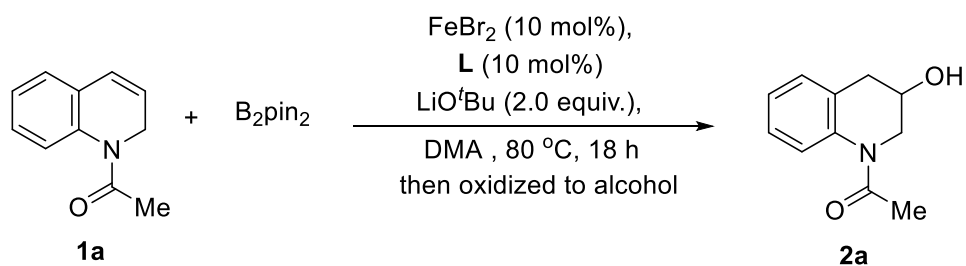

| Entry | Ligands              | Yield (%) <sup>b</sup> |
|-------|----------------------|------------------------|
| 1     | <b>L<sub>1</sub></b> | 87                     |
| 2     | <b>L<sub>2</sub></b> | 45                     |
| 3     | <b>L<sub>3</sub></b> | 69                     |
| 4     | <b>L<sub>4</sub></b> | 60                     |

<sup>a</sup> Standard conditions: **1a** (0.2 mmol),  $\text{B}_2\text{pin}_2$  (0.4 mmol),  $\text{FeBr}_2$  (0.02 mmol), **L** (0.02 mmol),  $\text{LiO}^t\text{Bu}$  (0.4 mmol), DMA (1.0 mL), at 80 °C for 18 h. Then  $\text{NaBO}_3 \cdot 4\text{H}_2\text{O}$  (0.6 mmol), THF (2 mL),  $\text{H}_2\text{O}$  (2 mL), 25 °C, 3 h.

<sup>b</sup> isolated yield.

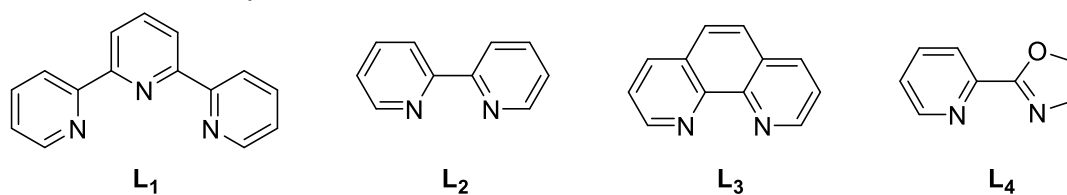

Table S4. The effect of different temperature. <sup>a</sup>

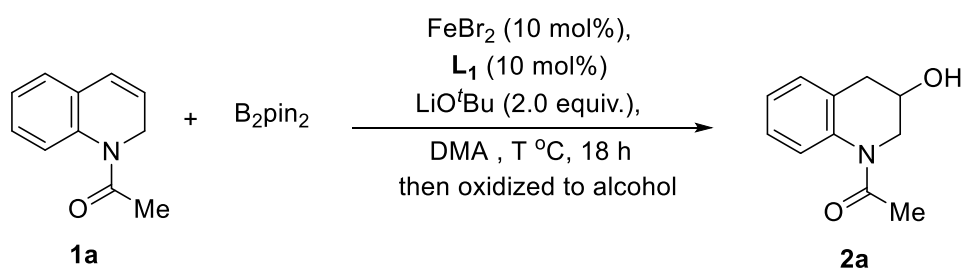

| Entry | Temperature (°C) | Yield (%) <sup>b</sup> |
|-------|------------------|------------------------|
| 1     | 40               | 28                     |
| 2     | 60               | 62                     |
| 3     | 70               | 84                     |
| 4     | 80               | 87                     |
| 5     | 90               | 78                     |
| 6     | 100              | 58                     |

<sup>a</sup> Standard conditions: **1a** (0.2 mmol),  $\text{B}_2\text{pin}_2$  (0.4 mmol),  $\text{FeBr}_2$  (0.02 mmol),  $\text{L}_1$  (0.02 mmol),  $\text{LiO}^t\text{Bu}$  (0.4 mmol), DMA (1.0 mL), at T °C for 18 h. Then  $\text{NaBO}_3 \cdot 4\text{H}_2\text{O}$  (0.6 mmol), THF (2 mL),  $\text{H}_2\text{O}$  (2 mL), 25 °C, 3 h.

<sup>b</sup> isolated yield.

#### 4. General procedure for the reaction

General procedure (C) :

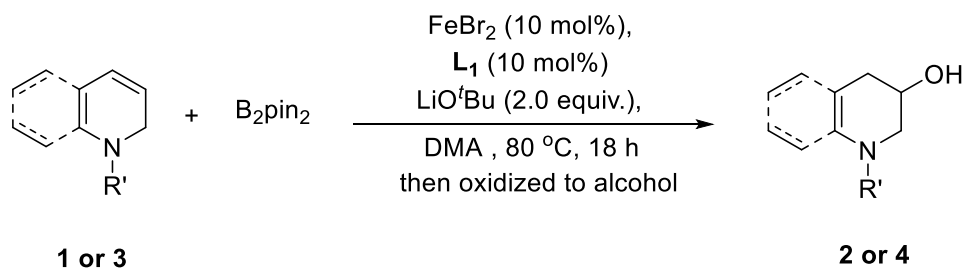

In an oven dried 10-mL Schlenk tube, which contained a stirring bar, was charged with  $\text{FeBr}_2$  (4.3 mg, 0.02 mmol, 10 mol%),  $\text{L}_1$  (4.7 mg, 0.02 mmol, 10 mol%),  $\text{B}_2\text{pin}_2$  (102 mg, 0.4 mmol, 2.0 equiv.), and  $\text{LiO}^t\text{Bu}$  (32 mg, 0.4 mmol, 2.0 equiv.). The tube was evacuated and back-filled under a  $\text{N}_2$  flow (this sequence was repeated three times), then anhydrous DMA (1.0 mL) was added under  $\text{N}_2$ . The tube was stirred at 25 °C for 60 min. After above, **1** or **3** (0.2 mmol, 1.0 equiv.) was added subsequently under  $\text{N}_2$ , the tube was stirred at 80 °C for 18 h. Then, the reaction mixture was diluted with EtOAc (2.0 mL), and it was extracted with EtOAc (2 mL  $\times$  3). The organic layer was combined and dried over  $\text{Na}_2\text{SO}_4$ , filtered and concentrated in vacuo to get the crude product. Then the crude product was dissolved in THF (2.0 mL),  $\text{NaBO}_3 \cdot 4\text{H}_2\text{O}$  (92.3 mg, 0.6 mmol, 3.0 equiv.) and  $\text{H}_2\text{O}$  (2.0 mL) were added, the resulting mixture was allowed to stir at 25 °C for three hours. The reaction mixture diluted with EtOAc (2.0 mL) and  $\text{H}_2\text{O}$  (2.0 mL), then it was extracted with EtOAc (2.0 mL  $\times$  3), the organic layer was combined, washed with brine and dried over  $\text{Na}_2\text{SO}_4$ , filtered and concentrated in vacuo. The residue was purified by silica gel chromatography (ethyl acetate/petroleum ether) to afford the product **2** or **4**.

### 5. The effect of substituent electricity.

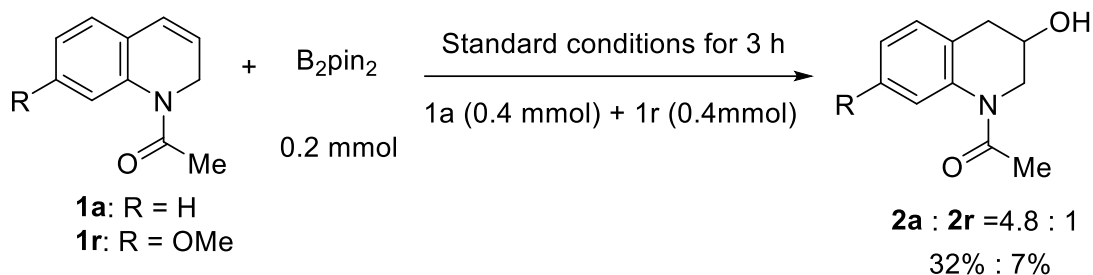

In an oven dried 10-mL Schlenk tube, which contained a stirring bar, was charged with  $\text{FeBr}_2$  (4.3 mg, 0.02 mmol, 10 mol%),  $\text{L}_1$  (4.7 mg, 0.02 mmol, 10 mol%),  $\text{B}_2\text{pin}_2$  (51 mg, 0.2 mmol, 1.0 equiv), and  $\text{LiO}^t\text{Bu}$  (16 mg, 0.2 mmol, 1.0 equiv.). The tube was evacuated and back-filled under a  $\text{N}_2$  flow (this sequence was repeated three times), then anhydrous DMA (1.0 mL) was added under  $\text{N}_2$ . The tube was stirred at 25 °C for 60 min. After above, **1a** (69.2 mg, 0.4 mmol, 2.0 equiv.) and **1r** (81.3 mg, 0.4 mmol, 2.0 equiv.) was added subsequently under  $\text{N}_2$ , the tube was stirred at 80 °C for 3 h. Then, the reaction mixture was diluted with EtOAc (2.0 mL), and it was extracted with EtOAc (2 mL  $\times$  3). The organic layer was combined and dried over  $\text{Na}_2\text{SO}_4$ , filtered and concentrated in vacuo to get the crude product. Then the crude product was dissolved in THF (2.0 mL),  $\text{NaBO}_3 \cdot 4\text{H}_2\text{O}$  (0.6 mmol) and  $\text{H}_2\text{O}$  (2.0 mL) were added, the resulting mixture was allowed to stir at 25 °C for three hours. The reaction mixture diluted with EtOAc (2.0 mL) and  $\text{H}_2\text{O}$  (2.0 mL), then it was extracted with EtOAc (2.0 mL  $\times$  3), the organic layer was combined, washed with brine and dried over  $\text{Na}_2\text{SO}_4$ , filtered and concentrated in vacuo. The residue was purified by silica gel chromatography (ethyl acetate : petroleum ether = 1 : 1) to afford the product **2a** (12.3 mg, 32% yield) and **2r** (3.1 mg, 7% yield).

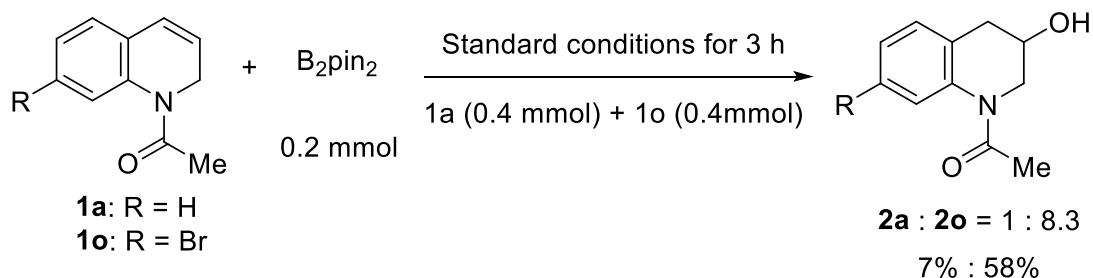

In an oven dried 10-mL Schlenk tube, which contained a stirring bar, was charged with  $\text{FeBr}_2$  (4.3 mg, 0.02 mmol, 10 mol%),  $\text{L}_1$  (4.7 mg, 0.02 mmol, 10 mol%),  $\text{B}_2\text{pin}_2$  (51 mg, 0.2 mmol, 1.0 equiv), and  $\text{LiO}^t\text{Bu}$  (16 mg, 0.2 mmol, 1.0 equiv.). The tube was evacuated and back-filled under a  $\text{N}_2$  flow (this sequence was repeated three times), then anhydrous DMA (1.0 mL) was added under  $\text{N}_2$ . The tube was stirred at 25 °C for 60 min. After above, **1a** (69.2 mg, 0.4 mmol, 2.0 equiv.) and **1o** (100.8 mg, 0.4 mmol, 2.0 equiv.) was added subsequently under  $\text{N}_2$ , the tube was stirred at 80 °C for 3 h. Then, the reaction mixture was diluted with EtOAc (2.0 mL), and it was extracted with EtOAc (2 mL  $\times$  3). The organic layer was combined and dried over  $\text{Na}_2\text{SO}_4$ , filtered and concentrated in vacuo to get the crude product. Then the crude product was dissolved in THF (2.0 mL),  $\text{NaBO}_3 \cdot 4\text{H}_2\text{O}$  (0.6 mmol) and  $\text{H}_2\text{O}$  (2.0 mL) were added, the resulting mixture was allowed to stir at 25 °C for three hours. The reaction mixture diluted with EtOAc (2.0 mL) and  $\text{H}_2\text{O}$  (2.0 mL), then it was extracted with EtOAc (2.0 mL  $\times$  3), the organic layer was combined, washed with brine and dried over  $\text{Na}_2\text{SO}_4$ , filtered and concentrated in vacuo. The residue was purified by

silica gel chromatography (ethyl acetate : petroleum ether = 1 : 1) to afford the product **2a** (2.7 mg, 7% yield) and **2o** (31,3 mg, 58% yield).



## 6. Unsuccessful substrates

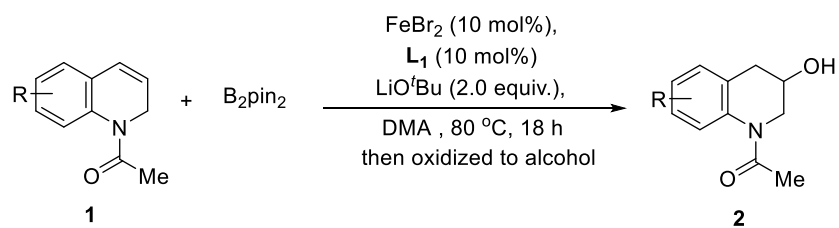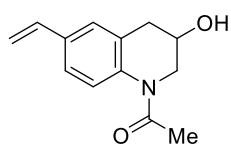

**2s**:Trace

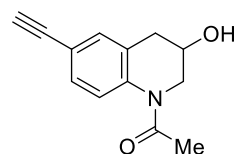

**2t**:NR

<sup>a</sup> Standard conditions: **1** (0.2 mmol), B<sub>2</sub>pin<sub>2</sub> (0.4 mmol), FeBr<sub>2</sub> (0.02 mmol), L<sub>1</sub> (0.02 mmol), LiO<sup>t</sup>Bu (0.4 mmol), DMA (1.0 mL), at 80 °C for 18 h. Then NaBO<sub>3</sub>·4 H<sub>2</sub>O (0.6 mmol), THF (2 mL), H<sub>2</sub>O (2 mL), 25 °C, 3 h. <sup>b</sup> isolated yield.

## 7. Radical trapping experiments.

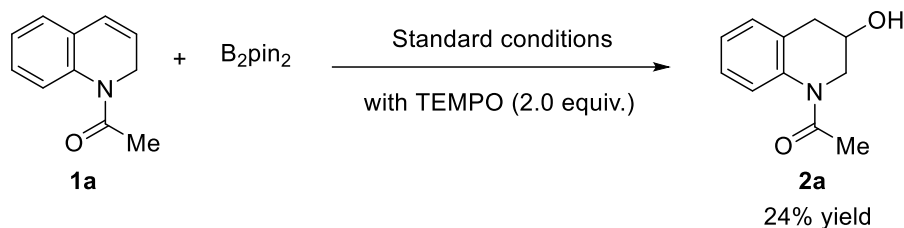

In an oven dried 10-mL Schlenk tube, which contained a stirring bar, was charged with FeBr<sub>2</sub> (4.3 mg, 0.02 mmol, 10 mol%), L<sub>1</sub> (4.7 mg, 0.02 mmol, 10 mol%), B<sub>2</sub>pin<sub>2</sub> (102 mg, 0.4 mmol, 2.0 equiv), and LiO<sup>t</sup>Bu (32 mg, 0.4 mmol, 2.0 equiv.). The tube was evacuated and back-filled under a N<sub>2</sub> flow (this sequence was repeated three times), then anhydrous DMA (1.0 mL) was added under N<sub>2</sub>. The tube was stirred at 25 °C for 60 min. After above, **1a** (34.6 mg, 0.2 mmol, 1.0 equiv.) and 2,2,6,6-Tetramethylpiperidine 1-oxyl (TEMPO) (62.6 mg, 0.4 mmol, 2.0 equiv.) was added subsequently under N<sub>2</sub>, the tube was stirred at 80 °C for 18 h. Then, the reaction mixture was diluted with EtOAc (2.0 mL), and it was extracted with EtOAc (2 mL × 3). The organic layer was combined and dried over Na<sub>2</sub>SO<sub>4</sub>, filtered and concentrated in vacuo to get the crude product. Then the crude product was dissolved in THF (2.0 mL), NaBO<sub>3</sub> · 4H<sub>2</sub>O (0.6 mmol) and H<sub>2</sub>O (2.0 mL) were added, the resulting mixture was allowed to stir at 25 °C for three hours. The reaction mixture diluted with EtOAc (2.0 mL) and H<sub>2</sub>O (2.0 mL), then it was extracted with EtOAc (2.0 mL × 3), the organic layer was combined, washed with brine and dried over Na<sub>2</sub>SO<sub>4</sub>, filtered and concentrated in vacuo. The residue was purified by silica gel chromatography (ethyl acetate : petroleum ether = 1 : 1) to afford the product **2a** (9.2 mg, 24% yield).

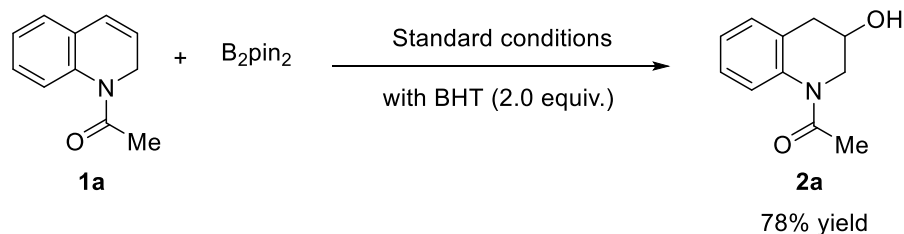

In an oven dried 10-mL Schlenk tube, which contained a stirring bar, was charged with FeBr<sub>2</sub> (4.3 mg, 0.02 mmol, 10 mol%), L<sub>1</sub> (4.7 mg, 0.02 mmol, 10 mol%), B<sub>2</sub>pin<sub>2</sub> (102 mg, 0.4 mmol, 2.0 equiv), and LiO<sup>t</sup>Bu (32 mg, 0.4 mmol, 2.0 equiv.). The tube was evacuated and back-filled under a N<sub>2</sub> flow (this sequence was repeated three times), then anhydrous DMA (1.0 mL) was added under N<sub>2</sub>. The tube was stirred at 25 °C for 60 min. After above, **1a** (34.6 mg, 0.2 mmol, 1.0 equiv.) and 2,6-di-tert-butyl-4-methylphenol (BHT) (88.1 mg, 0.4 mmol, 2.0 equiv.) was added subsequently under N<sub>2</sub>, the tube was stirred at 80 °C for 18 h. Then, the reaction mixture was diluted with EtOAc (2.0 mL), and it was extracted with EtOAc (2 mL × 3). The organic layer was combined and dried over Na<sub>2</sub>SO<sub>4</sub>, filtered and concentrated in vacuo to get the crude product. Then the crude product was dissolved in THF (2.0 mL), NaBO<sub>3</sub> · 4H<sub>2</sub>O (92.3 mg, 0.6 mmol, 3.0 equiv.) and H<sub>2</sub>O (2.0 mL) were added, the resulting mixture was allowed to stir at 25 °C for three hours. The reaction mixture diluted with EtOAc (2.0 mL) and H<sub>2</sub>O (2.0 mL), then it was extracted with EtOAc (2.0 mL × 3), the organic layer was combined, washed with brine and dried over Na<sub>2</sub>SO<sub>4</sub>, filtered and concentrated in vacuo. The residue was purified by silica gel chromatography (ethyl acetate : petroleum ether = 1 : 1) to afford the product **2a** (29.8 mg, 78% yield).

## 8. Analytical data for compounds

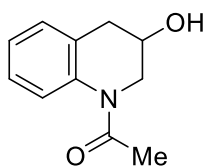

**2a**

**1-(3-hydroxy-3,4-dihydroquinolin-1(2H)-yl)ethan-1-one (2a).** The general procedure C was followed using 1-(quinolin-1(2H)-yl)ethan-1-one (**1a**, 34.6 mg, 0.2 mmol). Purification of this material by chromatography on silica gel (ethyl acetate : petroleum ether = 1 : 1 ) afforded product **2a** as a colorless oil (33.3 mg, 87 % yield):  $R_f = 0.2$  (ethyl acetate : petroleum ether = 1 : 1);  $^1\text{H NMR}$  ( $\text{CDCl}_3$ , 400 MHz)  $\delta$ : 7.34-7.01 (m, 4H), 4.41-4.23 (m, 1H), 4.00-3.72 (m, 2H), 3.42 (s, 1H), 3.07 (dd,  $J = 16.3, 5.0$  Hz, 1H), 2.79 (dd,  $J = 16.5, 5.3$  Hz, 1H), 2.24 (s, 3H);  $^{13}\text{C NMR}$  ( $\text{CDCl}_3$ , 101 MHz)  $\delta$ : 170.9, 138.7, 129.9, 129.5, 126.2, 125.6, 124.2, 65.8, 49.5, 35.7, 22.8 ppm; **HRMS** (ESI-TOF)  $m/z$  calcd for  $\text{C}_{11}\text{H}_{14}\text{NO}_2$  ( $\text{M} + \text{H}$ ) $^+$ : 191.1024, found 191.1028.

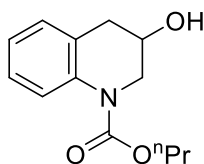

**2b**

**propyl 3-hydroxy-3,4-dihydroquinoline-1(2H)-carboxylate (2b).** The general procedure C was followed using propyl quinoline-1(2H)-carboxylate (**1b**, 43.5 mg, 0.2 mmol). Purification of this material by chromatography on silica gel (ethyl acetate : petroleum ether = 1 : 1 ) afforded product **2b** as a colorless oil (43.3 mg, 92 % yield):  $R_f = 0.5$  (ethyl acetate : petroleum ether = 1 : 1);  $^1\text{H NMR}$  ( $\text{CDCl}_3$ , 400 MHz)  $\delta$ : 7.66 (d,  $J = 8.1$  Hz, 1H), 7.21-7.15 (m, 1H), 7.11 (d,  $J = 6.6$  Hz, 1H), 7.04 (m, 1H), 4.27 (m, 1H), 4.15 (t,  $J = 6.7$  Hz, 2H), 3.86-3.74 (m, 2H), 3.09 (dd,  $J = 16.5, 5.2$  Hz, 1H), 2.81 (dd,  $J = 16.5, 5.5$  Hz, 1H), 2.26 (d,  $J = 4.6$  Hz, 1H), 1.70 (m, 2H), 0.97 (t,  $J = 7.4$  Hz, 3H);  $^{13}\text{C NMR}$  ( $\text{CDCl}_3$ , 101 MHz)  $\delta$ : 155.4, 137.6, 129.4, 126.6, 126.2, 124.1, 123.8, 67.8, 64.9, 50.4, 36.0, 22.2, 10.5 ppm; **HRMS** (ESI-TOF)  $m/z$  calcd for  $\text{C}_{13}\text{H}_{18}\text{NO}_3$  ( $\text{M} + \text{H}$ ) $^+$ : 236.1287, found 236.1295.

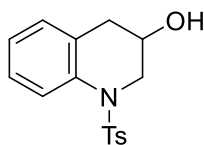

**2c**

**1-tosyl-1,2,3,4-tetrahydroquinolin-3-ol (2c).** The general procedure C was followed using 1-tosyl-1,2-dihydroquinoline (**1c**, 57.1 mg, 0.2 mmol). Purification of this material by chromatography on silica gel (ethyl acetate : petroleum ether = 1 : 1) afforded product **2c** as a colorless oil (46.1 mg, 72 % yield):  $R_f = 0.5$  (ethyl acetate : petroleum ether = 1 : 2);  $^1\text{H NMR}$  ( $\text{CDCl}_3$ , 600 MHz)  $\delta$ : 7.70 (d,  $J = 8.2$  Hz, 1H), 7.58 (d,  $J = 8.3$  Hz, 2H), 7.21 (dd,  $J = 22.9, 8.1$  Hz, 3H), 7.11-7.03 (m, 2H), 4.06-4.01 (m, 2H), 3.62 (dd,  $J = 14.3, 8.1$  Hz, 1H), 2.77 (dd,  $J = 16.2, 5.2$  Hz, 1H), 2.53 (dd,  $J = 16.2, 6.5$  Hz, 1H), 2.39 (s, 3H), 1.90 (s, 1H);  $^{13}\text{C NMR}$  ( $\text{CDCl}_3$ , 151 MHz)  $\delta$ : 143.8, 136.6, 136.1, 129.8, 129.7, 127.5, 127.0, 127.0, 125.1, 123.6, 64.1, 52.1, 35.8, 21.6 ppm;

**HRMS** (ESI-TOF)  $m/z$  calcd for  $C_{16}H_{18}NO_3S$  ( $M + H$ )<sup>+</sup>: 304.1007, found 304.1010.

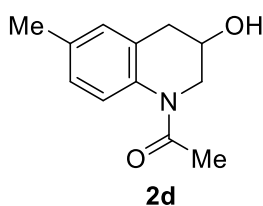

**1-(3-hydroxy-6-methyl-3,4-dihydroquinolin-1(2H)-yl)ethan-1-one (2d).** The general procedure C was followed using 1-(6-methylquinolin-1(2H)-yl)ethan-1-one (**1d**, 37.5 mg, 0.2 mmol). Purification of this material by chromatography on silica gel (ethyl acetate : petroleum ether = 1 : 1) afforded product **2d** as a colorless oil (35.7 mg, 87 % yield):  $R_f$  = 0.2 (ethyl acetate : petroleum ether = 1 : 1); <sup>1</sup>H NMR (CDCl<sub>3</sub>, 400 MHz)  $\delta$ : 6.98 (d,  $J$  = 5.9 Hz, 3H), 4.27-4.19 (m, 1H), 4.18-3.76 (m, 2H), 3.71 (dd,  $J$  = 12.9, 5.7 Hz, 1H), 2.99 (dt,  $J$  = 17.5, 5.7 Hz, 1H), 2.73 (dd,  $J$  = 16.4, 5.6 Hz, 1H), 2.30 (s, 3H), 2.21 (s, 3H); <sup>13</sup>C NMR (CDCl<sub>3</sub>, 101 MHz)  $\delta$ : 170.6, 136.0, 135.1, 129.6, 126.5, 123.6, 65.5, 49.3, 35.5, 22.4, 20.6 ppm; **HRMS** (ESI-TOF)  $m/z$  calcd for  $C_{12}H_{16}NO_2$  ( $M + H$ )<sup>+</sup>: 206.1181, found 206.1190.

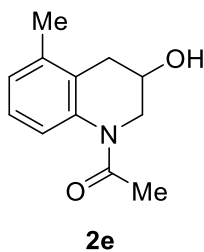

**1-(3-hydroxy-5-methyl-3,4-dihydroquinolin-1(2H)-yl)ethan-1-one (2e).** The general procedure C was followed using 1-(5-methylquinolin-1(2H)-yl)ethan-1-one (**1e**, 37.5 mg, 0.2 mmol). Purification of this material by chromatography on silica gel (ethyl acetate : petroleum ether = 1 : 1) afforded product **2e** as a colorless oil (27.1 mg, 66 % yield):  $R_f$  = 0.2 (ethyl acetate : petroleum ether = 1 : 1); <sup>1</sup>H NMR (CDCl<sub>3</sub>, 400 MHz)  $\delta$ : 7.27-6.87 (m, 3H), 4.33 (h,  $J$  = 4.9 Hz, 1H), 4.01-3.70 (m, 2H), 2.98 (dd,  $J$  = 17.3, 6.0 Hz, 1H), 2.79 (s, 1H), 2.67 (dd,  $J$  = 17.3, 5.0 Hz, 1H), 2.25 (d,  $J$  = 5.8 Hz, 6H); <sup>13</sup>C NMR (CDCl<sub>3</sub>, 101 MHz)  $\delta$ : 171.2, 138.8, 137.5, 127.0, 125.6, 122.2, 65.6, 48.8, 33.6, 22.8, 19.4 ppm; **HRMS** (ESI-TOF)  $m/z$  calcd for  $C_{12}H_{16}NO_2$  ( $M + H$ )<sup>+</sup>: 206.1181 found 206.1185.

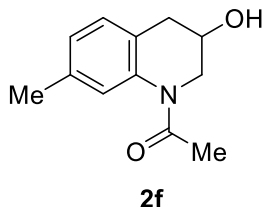

**1-(3-hydroxy-7-methyl-3,4-dihydroquinolin-1(2H)-yl)ethan-1-one (2f).** The general procedure C was followed using 1-(7-methylquinolin-1(2H)-yl)ethan-1-one (**1f**, 37.5 mg, 0.2 mmol). Purification of this material by chromatography on silica gel (ethyl acetate : petroleum ether = 1 : 1) afforded product **2f** as a colorless oil (30.0 mg, 73 % yield):  $R_f$  = 0.2 (ethyl acetate : petroleum ether = 1 : 1); <sup>1</sup>H NMR (CDCl<sub>3</sub>, 400 MHz)  $\delta$ : 7.01 (dd,  $J$  = 41.4, 7.6 Hz, 3H), 4.29 (p,  $J$  = 5.0 Hz, 1H), 3.83 (q,  $J$  = 13.1, 7.4 Hz, 2H), 3.15-2.84 (m, 2H), 2.75 (dd,  $J$  = 16.3, 5.2 Hz, 1H), 2.33 (s,

3H), 2.25 (s, 3H);  $^{13}\text{C}$  NMR ( $\text{CDCl}_3$ , 101 MHz)  $\delta$ : 170.9, 138.6, 138.5, 136.0, 129.2, 126.4, 124.8, 66.0, 49.7, 35.4, 22.8, 21.2 ppm; HRMS (ESI-TOF)  $m/z$  calcd for  $\text{C}_{12}\text{H}_{16}\text{NO}_2$  ( $\text{M} + \text{H}$ ) $^+$ : 206.1181, found 206.1180.

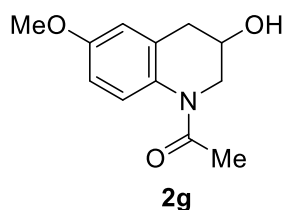

**1-(3-hydroxy-6-methoxy-3,4-dihydroquinolin-1(2H)-yl)ethan-1-one (2g).** The general procedure C was followed using 1-(6-methoxyquinolin-1(2H)-yl)ethan-1-one (**1g**, 40.6 mg, 0.2 mmol). Purification of this material by chromatography on silica gel (ethyl acetate : petroleum ether = 1 : 1) afforded product **2g** as a colorless oil (33.8 mg, 80 % yield):  $R_f$  = 0.2 (ethyl acetate : petroleum ether = 1 : 1);  $^1\text{H}$  NMR ( $\text{CDCl}_3$ , 400 MHz)  $\delta$ : 7.03 (s, 1H), 6.82-6.61 (m, 2H), 4.37-4.27 (m, 1H), 3.79 (m, 5H), 3.02 (d,  $J$  = 13.8 Hz, 1H), 2.86-2.55 (m, 2H), 2.21 (s, 3H);  $^{13}\text{C}$  NMR ( $\text{CDCl}_3$ , 101 MHz)  $\delta$ : 170.9, 157.4, 132.1, 131.6, 125.1, 114.1, 112.0, 66.2, 55.4, 49.6, 36.0, 22.5 ppm; HRMS (ESI-TOF)  $m/z$  calcd for  $\text{C}_{12}\text{H}_{16}\text{NO}_3$  ( $\text{M} + \text{H}$ ) $^+$ : 222.1130, found 222.1124.

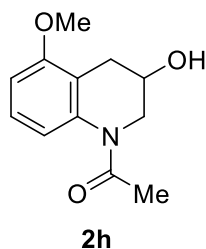

**1-(3-hydroxy-5-methoxy-3,4-dihydroquinolin-1(2H)-yl)ethan-1-one (2h).** The general procedure C was followed using 1-(5-methoxyquinolin-1(2H)-yl)ethan-1-one (**1h**, 40.6 mg, 0.2 mmol). Purification of this material by chromatography on silica gel (ethyl acetate : petroleum ether = 1 : 1) afforded product **2h** as a colorless oil (19.9 mg, 45 % yield):  $R_f$  = 0.2 (ethyl acetate : petroleum ether = 1 : 1);  $^1\text{H}$  NMR ( $\text{CDCl}_3$ , 400 MHz)  $\delta$ : 7.16 (t,  $J$  = 8.2 Hz, 1H), 6.68 (d,  $J$  = 8.3 Hz, 2H), 4.28 (t,  $J$  = 6.8 Hz, 1H), 3.83 (s, 5H), 3.00 (dd,  $J$  = 18.0, 6.1 Hz, 1H), 2.79 (s, 1H), 2.70 (dd,  $J$  = 18.0, 4.6 Hz, 1H), 2.26 (s, 3H);  $^{13}\text{C}$  NMR ( $\text{CDCl}_3$ , 101 MHz)  $\delta$ : 171.3, 157.6, 139.6, 126.1, 118.0, 116.8, 106.6, 65.0, 55.5, 48.9, 30.4, 23.0 ppm; HRMS (ESI-TOF)  $m/z$  calcd for  $\text{C}_{12}\text{H}_{16}\text{NO}_3$  ( $\text{M} + \text{H}$ ) $^+$ : 222.1130, found 222.1128.

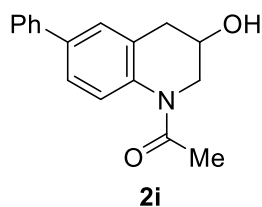

**1-(3-hydroxy-6-phenyl-3,4-dihydroquinolin-1(2H)-yl)ethan-1-one (2i).** The general procedure C was followed using 1-(6-phenylquinolin-1(2H)-yl)ethan-1-one (**1i**, 49.9 mg, 0.2 mmol). Purification of this material by chromatography on silica gel (ethyl acetate : petroleum ether = 1 : 1) afforded product **2i** as a colorless oil (37.2 mg, 70 % yield):  $R_f$  = 0.2 (ethyl acetate : petroleum ether = 1 : 1);  $^1\text{H}$  NMR ( $\text{CDCl}_3$ , 400 MHz)  $\delta$ : 7.55 (d,  $J$  = 7.3 Hz, 2H), 7.50-7.25 (m, 6H), 4.33 (q,

$J = 4.6$  Hz, 1H), 3.87 (s, 2H), 3.34-3.06 (m, 2H), 2.86 (dd,  $J = 16.5, 5.1$  Hz, 1H), 2.28 (s, 3H);  $^{13}\text{C}$  NMR (CDCl<sub>3</sub>, 101 MHz)  $\delta$ : 171.2, 140.3, 138.7, 138.0, 129.0, 128.2, 127.5, 127.0, 125.1, 124.7, 65.9, 49.9, 36.1, 23.1 ppm; HRMS (ESI-TOF)  $m/z$  calcd for C<sub>17</sub>H<sub>18</sub>NO<sub>2</sub> (M + H)<sup>+</sup>: 268.1338 found 268.1333.

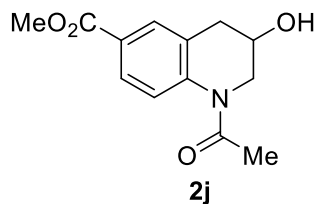

**methyl 1-acetyl-3-hydroxy-1,2,3,4-tetrahydroquinoline-6-carboxylate (2j).** The general procedure C was followed using methyl 1-acetyl-1, 2-dihydroquinoline-6-carboxylate (**1j**, 46.3 mg, 0.2 mmol). Purification of this material by chromatography on silica gel (ethyl acetate : petroleum ether = 1 : 1) afforded product **2j** as a colorless oil (20.9 mg, 42 % yield):  $R_f = 0.2$  (ethyl acetate : petroleum ether = 1 : 1);  $^1\text{H}$  NMR (CDCl<sub>3</sub>, 400 MHz)  $\delta$ : 7.83 (d,  $J = 8.9$  Hz, 2H), 7.37 (d,  $J = 9.4$  Hz, 1H), 4.26 (m, 1H), 3.89 (s, 4H), 3.78 (d,  $J = 4.9$  Hz, 2H), 3.07 (dd,  $J = 16.7, 5.4$  Hz, 1H), 2.82 (dd,  $J = 16.7, 5.2$  Hz, 1H), 2.25 (s, 3H);  $^{13}\text{C}$  NMR (CDCl<sub>3</sub>, 101 MHz)  $\delta$ : 170.9, 166.4, 142.3, 130.9, 128.8, 127.3, 126.4, 125.9, 64.7, 52.0, 50.2, 35.6, 23.1 ppm; HRMS (ESI-TOF)  $m/z$  calcd for C<sub>13</sub>H<sub>16</sub>NO<sub>4</sub> (M + H)<sup>+</sup>: 250.1079, found 250.1077.

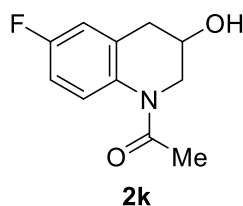

**1-(6-fluoro-3-hydroxy-3,4-dihydroquinolin-1(2H)-yl)ethan-1-one (2k).** The general procedure C was followed using 1-(6-fluoroquinolin-1(2H)-yl)ethan-1-one (**1k**, 38.2 mg, 0.2 mmol). Purification of this material by chromatography on silica gel (ethyl acetate : petroleum ether = 1 : 1) afforded product **2k** as a colorless oil (36.8 mg, 88 % yield):  $R_f = 0.2$  (ethyl acetate : petroleum ether = 1 : 1);  $^1\text{H}$  NMR (CDCl<sub>3</sub>, 400 MHz)  $\delta$ : 7.21-6.66 (m, 3H), 4.31 (q,  $J = 4.4$  Hz, 1H), 3.85 (s, 2H), 3.05 (d,  $J = 11.5$  Hz, 2H), 2.79 (dd,  $J = 16.8, 4.4$  Hz, 1H), 2.22 (s, 3H);  $^{13}\text{C}$  NMR (CDCl<sub>3</sub>, 101 MHz)  $\delta$ : 170.9, 161.3, 158.2, 134.6, 132.3, 125.7, 116.0, 113.0, 65.4, 49.5, 35.8, 22.6 ppm;  $^{19}\text{F}$  NMR (CDCl<sub>3</sub>, 376 MHz)  $\delta$ : -116.31, -117.43; HRMS (ESI-TOF)  $m/z$  calcd for C<sub>11</sub>H<sub>13</sub>FNO<sub>2</sub> (M + H)<sup>+</sup>: 210.0930, found 210.0920.

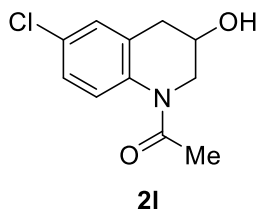

**1-(6-chloro-3-hydroxy-3,4-dihydroquinolin-1(2H)-yl)ethan-1-one (2l).** The general procedure C was followed using 1-(6-chloroquinolin-1(2H)-yl)ethan-1-one (**1l**, 41.5 mg, 0.2 mmol). Purification of this material by chromatography on silica gel (ethyl acetate : petroleum ether = 1 : 1) afforded product **2l** as a colorless oil (38.8 mg, 86 % yield):  $R_f = 0.2$  (ethyl acetate : petroleum

ether = 1 : 1);  $^1\text{H NMR}$  ( $\text{CDCl}_3$ , 400 MHz)  $\delta$ : 7.33-6.92 (m, 3H), 4.26 (p,  $J = 4.6$  Hz, 1H), 3.81 (dd,  $J = 12.0, 4.9$  Hz, 2H), 3.56 (s, 1H), 3.02 (dd,  $J = 16.7, 5.0$  Hz, 1H), 2.76 (dd,  $J = 16.8, 4.8$  Hz, 1H), 2.22 (s, 3H);  $^{13}\text{C NMR}$  ( $\text{CDCl}_3$ , 101 MHz)  $\delta$ : 170.9, 137.0, 131.7, 130.7, 129.1, 126.1, 125.4, 65.0, 49.3, 35.5, 22.8 ppm; **HRMS** (ESI-TOF)  $m/z$  calcd for  $\text{C}_{11}\text{H}_{13}\text{ClNO}_2$  ( $\text{M} + \text{H}$ ) $^+$ : 226.0625, found 226.0637.

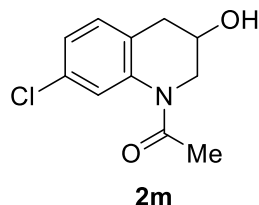

**1-(7-chloro-3-hydroxy-3,4-dihydroquinolin-1(2H)-yl)ethan-1-one (2m).** The general procedure C was followed using 1-(7-chloroquinolin-1(2H)-yl)ethan-1-one (**1m**, 41.5 mg, 0.2 mmol). Purification of this material by chromatography on silica gel (ethyl acetate : petroleum ether = 1 : 1) afforded product **2m** as a colorless oil (31.6 mg, 70 % yield):  $R_f = 0.2$  (ethyl acetate : petroleum ether = 1 : 1);  $^1\text{H NMR}$  ( $\text{CDCl}_3$ , 400 MHz)  $\delta$ : 7.18 (d,  $J = 81.3$  Hz, 3H), 4.26 (m, 1H), 3.78 (dt,  $J = 23.3, 11.7$  Hz, 3H), 3.02 (dd,  $J = 16.7, 5.4$  Hz, 1H), 2.75 (dd,  $J = 16.8, 4.9$  Hz, 1H), 2.24 (s, 3H);  $^{13}\text{C NMR}$  ( $\text{CDCl}_3$ , 101 MHz)  $\delta$ : 170.9, 139.2, 131.3, 130.4, 125.4, 124.2, 65.0, 49.6, 35.2, 22.9 ppm; **HRMS** (ESI-TOF)  $m/z$  calcd for  $\text{C}_{11}\text{H}_{13}\text{ClNO}_2$  ( $\text{M} + \text{H}$ ) $^+$ : 226.0635, found 226.0631.

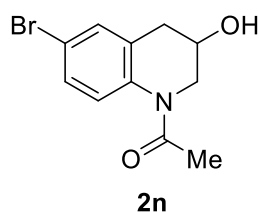

**1-(6-bromo-3-hydroxy-3,4-dihydroquinolin-1(2H)-yl)ethan-1-one (2n).** The general procedure C was followed using 1-(6-bromoquinolin-1(2H)-yl)ethan-1-one (**1n**, 50.4 mg, 0.2 mmol). Purification of this material by chromatography on silica gel (ethyl acetate : petroleum ether = 1 : 1) afforded product **2n** as a colorless oil (44.3 mg, 82 % yield):  $R_f = 0.2$  (ethyl acetate : petroleum ether = 1 : 1);  $^1\text{H NMR}$  ( $\text{CDCl}_3$ , 400 MHz)  $\delta$ : 7.42-6.92 (m, 3H), 4.32-4.22 (m, 1H), 3.91-3.62 (m, 2H), 3.38 (s, 1H), 3.03 (dd,  $J = 16.8, 5.1$  Hz, 1H), 2.77 (dd,  $J = 16.8, 4.7$  Hz, 1H), 2.22 (s, 3H);  $^{13}\text{C NMR}$  ( $\text{CDCl}_3$ , 101 MHz)  $\delta$ : 170.9, 137.6, 132.1, 129.1, 125.8, 118.5, 65.1, 49.5, 35.4, 22.8 ppm; **HRMS** (ESI-TOF)  $m/z$  calcd for  $\text{C}_{11}\text{H}_{13}\text{BrNO}_2$  ( $\text{M} + \text{H}$ ) $^+$ : 270.0130, found 270.0135.

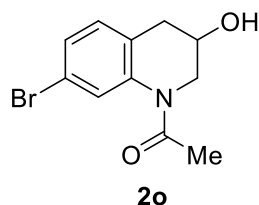

**1-(7-bromo-3-hydroxy-3,4-dihydroquinolin-1(2H)-yl)ethan-1-one (2o).** The general procedure C was followed using 1-(7-bromoquinolin-1(2H)-yl)ethan-1-one (**1o**, 50.4 mg, 0.2 mmol). Purification of this material by chromatography on silica gel (ethyl acetate : petroleum ether = 1 : 1) afforded product **2o** as a colorless oil (35.7 mg, 66 % yield):  $R_f = 0.2$  (ethyl acetate : petroleum

ether = 1 : 1);  $^1\text{H NMR}$  ( $\text{CDCl}_3$ , 400 MHz)  $\delta$ : 7.74-7.11 (m, 2H), 7.02 (d,  $J = 8.0$  Hz, 1H), 4.27 (h,  $J = 4.9$  Hz, 1H), 3.84-3.65 (m, 2H), 3.54 (s, 1H), 3.00 (dd,  $J = 16.8, 5.4$  Hz, 1H), 2.74 (dd,  $J = 16.8, 4.9$  Hz, 1H), 2.25 (s, 3H);  $^{13}\text{C NMR}$  ( $\text{CDCl}_3$ , 101 MHz)  $\delta$ : 170.9, 139.7, 130.8, 128.3, 127.1, 119.0, 65.0, 49.8, 35.3, 22.9 ppm; **HRMS** (ESI-TOF)  $m/z$  calcd for  $\text{C}_{11}\text{H}_{13}\text{BrNO}_2$  ( $\text{M} + \text{H}$ ) $^+$ : 270.0130, found 270.0134.

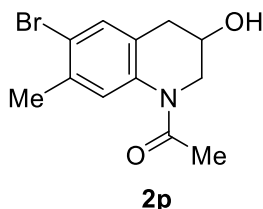

**1-(6-bromo-3-hydroxy-7-methyl-3,4-dihydroquinolin-1(2H)-yl)ethan-1-one (2p).** The general procedure C was followed using 1-(6-bromo-7-methylquinolin-1(2H)-yl)ethan-1-one (**1p**, 53.2 mg, 0.2 mmol). Purification of this material by chromatography on silica gel (ethyl acetate : petroleum ether = 1 : 1) afforded product **2p** as a colorless oil (36.4 mg, 64 % yield):  $R_f = 0.2$  (ethyl acetate : petroleum ether = 1 : 1);  $^1\text{H NMR}$  ( $\text{CDCl}_3$ , 400 MHz)  $\delta$ : 7.30 (d,  $J = 10.2$  Hz, 2H), 4.26-4.19 (m, 1H), 3.75 (s, 3H), 2.98 (dd,  $J = 16.6, 5.1$  Hz, 1H), 2.72 (dd,  $J = 16.6, 5.0$  Hz, 1H), 2.35 (s, 3H), 2.22 (s, 3H);  $^{13}\text{C NMR}$  ( $\text{CDCl}_3$ , 101 MHz)  $\delta$ : 170.8, 137.5, 135.5, 132.6, 129.0, 126.2, 121.0, 65.1, 49.8, 35.0, 22.9, 22.6 ppm; **HRMS** (ESI-TOF)  $m/z$  calcd for  $\text{C}_{12}\text{H}_{15}\text{BrNO}_2$  ( $\text{M} + \text{H}$ ) $^+$ : 284.0286, found 284.0283.

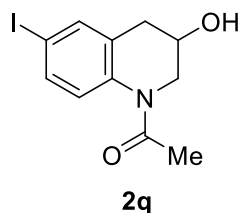

**1-(3-hydroxy-6-iodo-3,4-dihydroquinolin-1(2H)-yl)ethan-1-one (2q).** The general procedure C was followed using 1-(6-iodoquinolin-1(2H)-yl)ethan-1-one (**1q**, 59.8 mg, 0.2 mmol). Purification of this material by chromatography on silica gel (ethyl acetate : petroleum ether = 1 : 1) afforded product **2q** as a colorless oil (45.0 mg, 71 % yield):  $R_f = 0.2$  (ethyl acetate : petroleum ether = 1 : 1);  $^1\text{H NMR}$  ( $\text{CDCl}_3$ , 400 MHz)  $\delta$ : 7.49 (d,  $J = 6.4$  Hz, 2H), 6.95 (s, 1H), 4.25 (h,  $J = 4.8$  Hz, 1H), 3.79 (dt,  $J = 17.3, 8.8$  Hz, 2H), 3.48 (s, 1H), 3.00 (dd,  $J = 15.8, 6.2$  Hz, 1H), 2.74 (dd,  $J = 16.8, 4.9$  Hz, 1H), 2.22 (s, 3H);  $^{13}\text{C NMR}$  ( $\text{CDCl}_3$ , 101 MHz)  $\delta$ : 170.8, 138.1, 135.0, 132.2, 126.0, 89.5, 64.9, 49.5, 35.2, 22.9 ppm; **HRMS** (ESI-TOF)  $m/z$  calcd for  $\text{C}_{11}\text{H}_{13}\text{INO}_2$  ( $\text{M} + \text{H}$ ) $^+$ : 317.9991, found 317.9999.

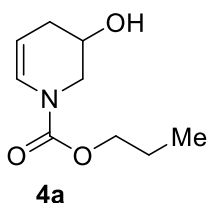

**propyl 3-hydroxy-3,4-dihydropyridine-1(2H)-carboxylate (4a).** The general procedure C was followed using propyl pyridine-1(2H)-carboxylate (**3a**, 33.5 mg, 0.2 mmol). Purification of this material by chromatography on silica gel (ethyl acetate : petroleum ether = 1 : 3) afforded product



**4a** as a colorless oil (30.0 mg, 81 % yield):  $R_f = 0.4$  (ethyl acetate : petroleum ether = 1 : 3);  $^1\text{H NMR}$  ( $\text{CDCl}_3$ , 400 MHz)  $\delta$ : 6.90 (d,  $J = 8.2$  Hz, 0.5H), 6.79 (d,  $J = 8.2$  Hz, 0.5H), 4.92-4.82 (m, 0.5H), 4.83-4.71 (m, 0.5H), 4.10 (t,  $J = 6.2$  Hz, 3H), 3.71-3.49 (m, 2H), 3.03-2.91 (m, 0.5H), 2.85-2.71 (m, 0.5H), 2.37 (d,  $J = 17.3$  Hz, 1H), 2.09 (d,  $J = 17.5$  Hz, 1H), 1.69 (m, 2H), 0.96 (t,  $J = 7.4$  Hz, 3H);  $^{13}\text{C NMR}$  ( $\text{CDCl}_3$ , 101 MHz)  $\delta$ : 154.1, 153.7, 125.2, 124.6, 102.8, 102.5, 67.6, 67.5, 63.1, 47.8, 47.5, 30.1, 22.1, 10.3 ppm; **HRMS** (ESI-TOF)  $m/z$  calcd for  $\text{C}_9\text{H}_{16}\text{NO}_3$  ( $\text{M} + \text{H}$ ) $^+$ : 186.1130, found 186.1138.

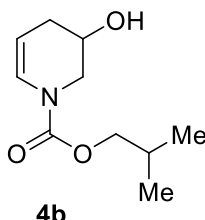

**isobutyl 3-hydroxy-3,4-dihydropyridine-1(2H)-carboxylate (4b).** The general procedure C was followed using isobutyl pyridine-1(2H)-carboxylate (**3b**, 36.2 mg, 0.2 mmol). Purification of this material by chromatography on silica gel (ethyl acetate : petroleum ether = 1 : 3) afforded product **4b** as a colorless oil (29.9 mg, 75 % yield):  $R_f = 0.4$  (ethyl acetate : petroleum ether = 1 : 3);  $^1\text{H NMR}$  ( $\text{CDCl}_3$ , 400 MHz)  $\delta$ : 6.89 (d,  $J = 8.1$  Hz, 0.5H), 6.79 (d,  $J = 8.2$  Hz, 0.5H), 4.90-4.84 (m, 0.5H), 4.81 (dd,  $J = 7.8, 3.7$  Hz, 0.5H), 4.12 (s, 1H), 3.92 (d,  $J = 6.7$  Hz, 2H), 3.66 (t,  $J = 9.7$  Hz, 1H), 3.55 (d,  $J = 6.8$  Hz, 1H), 3.20 (s, 0.5H), 3.01 (s, 0.5H), 2.34 (s, 1H), 2.08 (d,  $J = 17.4$  Hz, 1H), 1.96 (dt,  $J = 13.4, 6.7$  Hz, 1H), 0.95 (d,  $J = 6.8$  Hz, 6H);  $^{13}\text{C NMR}$  ( $\text{CDCl}_3$ , 101 MHz)  $\delta$ : 154.0, 153.7, 125.1, 124.5, 102.9, 102.5, 72.1, 71.9, 47.7, 47.5, 30.1, 27.7, 18.9 ppm; **HRMS** (ESI-TOF)  $m/z$  calcd for  $\text{C}_{10}\text{H}_{18}\text{NO}_3$  ( $\text{M} + \text{H}$ ) $^+$ : 200.1287, found 200.1296.

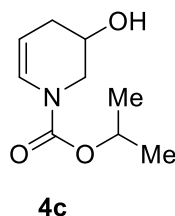

**isopropyl 3-hydroxy-3,4-dihydropyridine-1(2H)-carboxylate (4c).** The general procedure C was followed using isopropyl pyridine-1(2H)-carboxylate (**3c**, 33.4 mg, 0.2 mmol). Purification of this material by chromatography on silica gel (ethyl acetate : petroleum ether = 1 : 3) afforded product **4c** as a colorless oil (28.5 mg, 77 % yield):  $R_f = 0.4$  (ethyl acetate : petroleum ether = 1 : 3);  $^1\text{H NMR}$  ( $\text{CDCl}_3$ , 400 MHz)  $\delta$ : 6.92 (d,  $J = 7.9$  Hz, 0.5H), 6.84-6.76 (m, 0.5H), 4.98 (dq,  $J = 12.5, 6.2$  Hz, 1H), 4.90-4.81 (m, 0.5H), 4.80-4.69 (m, 0.5H), 4.14 (s, 1H), 3.67-3.55 (m, 2H), 2.55 (s, 0.5H), 2.37 (d,  $J = 17.4$  Hz, 1.5H), 2.15-2.01 (m, 1H), 1.28 (d,  $J = 6.3$  Hz, 6H);  $^{13}\text{C NMR}$  ( $\text{CDCl}_3$ , 101 MHz)  $\delta$ : 153.6, 153.3, 125.3, 124.9, 102.3, 102.2, 69.7, 63.2, 47.8, 47.5, 30.2, 22.0 ppm; **HRMS** (ESI-TOF)  $m/z$  calcd for  $\text{C}_9\text{H}_{16}\text{NO}_3$  ( $\text{M} + \text{H}$ ) $^+$ : 186.1130, found 186.1133.

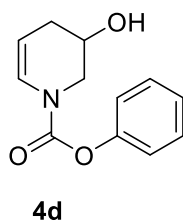

**phenyl 3-hydroxy-3,4-dihydropyridine-1(2H)-carboxylate (4d).** The general procedure C was followed using phenyl pyridine-1(2H)-carboxylate (**3d**, 40.2 mg, 0.2 mmol). Purification of this material by chromatography on silica gel (ethyl acetate : petroleum ether = 1 : 3) afforded product **4d** as a colorless oil (30.7 mg, 70 % yield):  $R_f = 0.4$  (ethyl acetate : petroleum ether = 1 : 3);  $^1\text{H NMR}$  ( $\text{CDCl}_3$ , 600 MHz)  $\delta$ : 7.37 (t,  $J = 7.9$  Hz, 2H), 7.22 (t,  $J = 7.4$  Hz, 1H), 7.15-7.12 (m, 2H), 6.99 (dt,  $J = 8.3, 1.9$  Hz, 0.5H), 6.95-6.92 (m, 0.5H), 5.00-4.93 (m, 0.5H), 4.92 (dd,  $J = 8.2, 4.0$  Hz, 0.5H), 4.19-4.15 (m, 1H), 3.86-3.70 (m, 1H), 3.68 (d,  $J = 4.6$  Hz, 1H), 2.43-2.33 (m, 2H), 2.12 (dt,  $J = 16.9, 4.3$  Hz, 1H);  $^{13}\text{C NMR}$  ( $\text{CDCl}_3$ , 151 MHz)  $\delta$ : 152.5, 152.1, 150.9, 150.8, 129.3, 125.7, 125.0, 124.6, 121.5, 104.1, 104.0, 63.0, 48.4, 47.8, 30.1 ppm; **HRMS** (ESI-TOF)  $m/z$  calcd for  $\text{C}_{12}\text{H}_{14}\text{NO}_3$  ( $\text{M} + \text{H}$ ) $^+$ : 220.0974, found 220.0971.

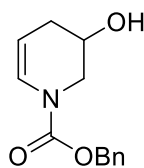

**4e**

**benzyl 3-hydroxy-3,4-dihydropyridine-1(2H)-carboxylate (4e).** The general procedure C was followed using benzyl pyridine-1(2H)-carboxylate (**3e**, 43.1 mg, 0.2 mmol). Purification of this material by chromatography on silica gel (ethyl acetate : petroleum ether = 1 : 3) afforded product **4e** as a colorless oil (30.8 mg, 66 % yield):  $R_f = 0.4$  (ethyl acetate : petroleum ether = 1 : 3);  $^1\text{H NMR}$  ( $\text{CDCl}_3$ , 400 MHz)  $\delta$ : 7.38-7.31 (m, 5H), 6.93 (d,  $J = 7.8$  Hz, 0.5H), 6.82 (d,  $J = 8.0$  Hz, 0.5H), 5.18 (d,  $J = 4.0$  Hz, 2H), 4.81-4.76 (m, 1H), 4.13 (d,  $J = 13.7$  Hz, 1H), 3.63 (p,  $J = 11.2, 9.1$  Hz, 2H), 2.38-2.05 (m, 3H);  $^{13}\text{C NMR}$  ( $\text{CDCl}_3$ , 101 MHz)  $\delta$ : 153.9, 153.5, 136.0, 128.5, 128.2, 128.1, 125.3, 124.8, 102.9, 102.8, 67.8, 67.6, 63.2, 63.1, 47.9, 47.7, 30.2 ppm; **HRMS** (ESI-TOF)  $m/z$  calcd for  $\text{C}_{13}\text{H}_{16}\text{NO}_3$  ( $\text{M} + \text{H}$ ) $^+$ : 234.1130, found 234.1140.

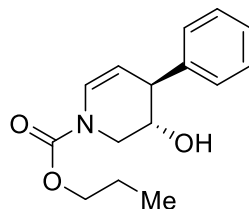

**4f**

**propyl 3-hydroxy-4-phenyl-3,4-dihydropyridine-1(2H)-carboxylate (4f).** The general procedure C was followed using propyl 4-phenylpyridine-1(2H)-carboxylate (**3f**, 48.7 mg, 0.2 mmol). Purification of this material by chromatography on silica gel (ethyl acetate : petroleum ether = 1 : 3) afforded product **4f** as a colorless oil (38.2 mg, 73 % yield):  $R_f = 0.5$  (ethyl acetate : petroleum ether = 1 : 3);  $^1\text{H NMR}$  ( $\text{CDCl}_3$ , 400 MHz)  $\delta$ : 7.35-7.23 (m, 5H), 7.13 (d,  $J = 8.0$  Hz, 0.5H), 7.02 (d,  $J = 8.1$  Hz, 0.5H), 4.89 (dd,  $J = 28.1, 6.5$  Hz, 1H), 4.11 (d,  $J = 5.6$  Hz, 2H), 3.87 (s, 1H), 3.65 (t,  $J = 10.3$  Hz, 1H), 3.58-3.48 (m, 1H), 3.41 (s, 1H), 2.57 (dd,  $J = 36.6, 4.4$  Hz, 1H), 1.69 (dq,  $J = 12.9, 6.8$  Hz, 2H), 0.97 (dt,  $J = 13.7, 7.3$  Hz, 3H);  $^{13}\text{C NMR}$  ( $\text{CDCl}_3$ , 101 MHz)  $\delta$ : 153.9, 153.5, 141.9, 128.5, 128.3, 127.0, 125.9, 125.4, 105.6, 105.4, 69.6, 67.8, 67.7, 46.9, 45.2, 45.0, 22.1, 10.3 ppm; **HRMS** (ESI-TOF)  $m/z$  calcd for  $\text{C}_{15}\text{H}_{20}\text{NO}_3$  ( $\text{M} + \text{H}$ ) $^+$ : 262.1443, found 262.1452.

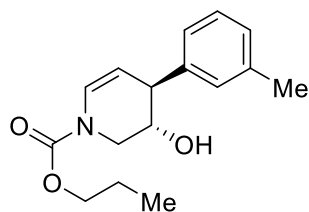

**4g**

**propyl 3-hydroxy-4-(m-tolyl)-3,4-dihydropyridine-1(2H)-carboxylate (4g).** The general procedure C was followed using propyl propyl 4-(m-tolyl)pyridine-1(2H)-carboxylate (**3g**, 51.5 mg, 0.2 mmol). Purification of this material by chromatography on silica gel (ethyl acetate : petroleum ether = 1 : 3) afforded product **4g** as a colorless oil (38.0 mg, 69 % yield):  $R_f = 0.5$  (ethyl acetate : petroleum ether = 1 : 3);  $^1\text{H NMR}$  ( $\text{CDCl}_3$ , 400 MHz)  $\delta$ : 7.20 (t,  $J = 7.7$  Hz, 1H), 7.03 (q,  $J = 11.8, 9.2$  Hz, 4H), 4.94-4.80 (m, 1H), 4.14-4.07 (m, 2H), 3.85 (s, 1H), 3.66 (d,  $J = 12.6$  Hz, 1H), 3.51 (dd,  $J = 12.0, 7.2$  Hz, 1H), 3.36 (s, 1H), 2.79 (d,  $J = 4.9$  Hz, 0.5H), 2.68 (d,  $J = 6.0$  Hz, 0.5H), 2.33 (s, 3H), 1.69 (dq,  $J = 13.5, 6.9$  Hz, 2H), 0.97 (dt,  $J = 13.6, 7.3$  Hz, 3H);  $^{13}\text{C NMR}$  ( $\text{CDCl}_3$ , 101 MHz)  $\delta$ : 153.9, 153.5, 141.8, 138.1, 128.9, 128.3, 127.6, 125.7, 125.3, 125.2, 105.8, 105.7, 69.5, 67.7, 67.6, 46.8, 45.2, 45.0, 22.1, 21.3, 10.3 ppm; **HRMS** (ESI-TOF)  $m/z$  calcd for  $\text{C}_{16}\text{H}_{22}\text{NO}_3$  ( $\text{M} + \text{H}$ ) $^+$ : 276.1600, found 276.1606.

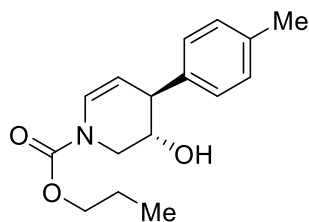

**4h**

**propyl 3-hydroxy-4-(p-tolyl)-3,4-dihydropyridine-1(2H)-carboxylate (4h).** The general procedure C was followed using propyl propyl 4-(p-tolyl)pyridine-1(2H)-carboxylate (**3h**, 51.5 mg, 0.2 mmol). Purification of this material by chromatography on silica gel (ethyl acetate : petroleum ether = 1 : 3) afforded product **4h** as a colorless oil (40.2 mg, 73 % yield):  $R_f = 0.5$  (ethyl acetate : petroleum ether = 1 : 3);  $^1\text{H NMR}$  ( $\text{CDCl}_3$ , 400 MHz)  $\delta$ : 7.14 (s, 4.5H), 7.02 (d,  $J = 8.0$  Hz, 0.5H), 4.88 (dd,  $J = 34.2, 6.4$  Hz, 1H), 4.13 (q,  $J = 5.9, 5.5$  Hz, 2H), 3.87 (s, 1H), 3.67 (t,  $J = 13.4$  Hz, 1H), 3.59-3.50 (m, 1H), 3.39 (s, 1H), 2.33 (s, 3H), 2.22-2.14 (m, 1H), 1.70 (dd,  $J = 13.1, 6.7$  Hz, 2H), 0.97 (dt,  $J = 14.3, 7.3$  Hz, 3H);  $^{13}\text{C NMR}$  ( $\text{CDCl}_3$ , 101 MHz)  $\delta$ : 154.0, 153.5, 138.8, 136.8, 129.3, 128.2, 125.9, 125.4, 105.6, 105.5, 69.8, 67.8, 67.7, 46.6, 45.2, 45.0, 22.2, 21.0, 10.4 ppm; **HRMS** (ESI-TOF)  $m/z$  calcd for  $\text{C}_{16}\text{H}_{22}\text{NO}_3$  ( $\text{M} + \text{H}$ ) $^+$ : 276.1600, found 276.1604.

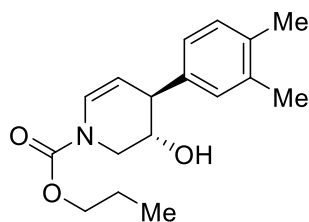

**4i**

**propyl 4-(3,4-dimethylphenyl)-3-hydroxy-3,4-dihydropyridine-1(2H)-carboxylate (4i).** The general procedure C was followed using propyl

4-(3,4-dimethylphenyl)pyridine-1(2*H*)-carboxylate (**3i**, 54.3 mg, 0.2 mmol). Purification of this material by chromatography on silica gel (ethyl acetate : petroleum ether = 1 : 3) afforded product **4i** as a colorless oil (29.5 mg, 51 % yield):  $R_f = 0.5$  (ethyl acetate : petroleum ether = 1 : 3);  $^1\text{H NMR}$  ( $\text{CDCl}_3$ , 400 MHz)  $\delta$ : 7.17-6.97 (m, 4H), 4.94 (d,  $J = 5.7$  Hz, 0.5H), 4.86 (d,  $J = 5.9$  Hz, 0.5H), 4.13 (s, 3H), 3.83-3.58 (m, 3H), 2.26 (d,  $J = 5.0$  Hz, 6H), 1.75-1.67 (m, 2H), 1.45 (d,  $J = 5.9$  Hz, 1H), 1.02-0.94 (m, 3H);  $^{13}\text{C NMR}$  ( $\text{CDCl}_3$ , 101 MHz)  $\delta$ : 154.1, 153.6, 136.9, 136.5, 136.4, 135.8, 130.3, 130.0, 126.4, 126.3, 125.8, 105.2, 105.1, 67.8, 67.7, 66.0, 45.8, 43.5, 43.4, 22.2, 19.8, 19.3, 10.4 ppm; **HRMS** (ESI-TOF)  $m/z$  calcd for  $\text{C}_{17}\text{H}_{24}\text{NO}_3$  ( $\text{M} + \text{H}$ ) $^+$ : 290.1756, found 290.1758.

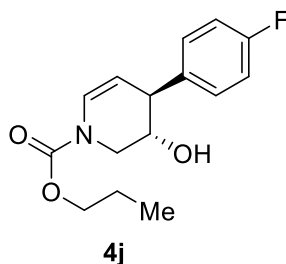

**propyl 4-(4-fluorophenyl)-3-hydroxy-3,4-dihydropyridine-1(2*H*)-carboxylate (4j).** The general procedure C was followed using propyl 4-(4-fluorophenyl)pyridine-1(2*H*)-carboxylate (**3j**, 52.3 mg, 0.2 mmol). Purification of this material by chromatography on silica gel (ethyl acetate : petroleum ether = 1 : 3) afforded product **4j** as a colorless oil (35.2 mg, 63 % yield):  $R_f = 0.5$  (ethyl acetate : petroleum ether = 1:3);  $^1\text{H NMR}$  ( $\text{CDCl}_3$ , 600 MHz)  $\delta$ : 7.21 (dd,  $J = 8.4, 5.5$  Hz, 2H), 7.12 (d,  $J = 8.0$  Hz, 0.5H), 7.01 (t,  $J = 8.5$  Hz, 2.5H), 4.94-4.77 (m, 1H), 4.11 (d,  $J = 6.4$  Hz, 2H), 3.84 (s, 1H), 3.64 (dd,  $J = 19.9, 14.2$  Hz, 1H), 3.53 (dd,  $J = 12.8, 7.1$  Hz, 1H), 3.40 (s, 1H), 2.80 (d,  $J = 5.0$  Hz, 0.5H), 2.69-2.50 (m, 0.5H), 1.70 (dq,  $J = 16.9, 7.0$  Hz, 2H), 1.01-0.94 (m, 3H);  $^{13}\text{C NMR}$  ( $\text{CDCl}_3$ , 101 MHz)  $\delta$ : 163.0, 160.6, 153.9, 153.5, 137.6, 129.8, 126.1, 125.6, 115.4, 115.2, 105.5, 105.2, 69.6, 67.9, 67.8, 46.1, 45.2, 45.0, 22.1, 10.3 ppm;  $^{19}\text{F NMR}$  ( $\text{CDCl}_3$ , 376 MHz)  $\delta$ : -115.70 ppm; **HRMS** (ESI-TOF)  $m/z$  calcd for  $\text{C}_{15}\text{H}_{19}\text{FNO}_3$  ( $\text{M} + \text{H}$ ) $^+$ : 280.1349, found 280.1350

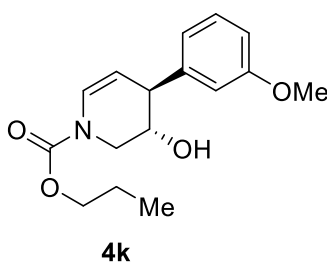

**propyl 3-hydroxy-4-(3-methoxyphenyl)-3,4-dihydropyridine-1(2*H*)-carboxylate (4k).** The general procedure C was followed using propyl 4-(3-methoxyphenyl)pyridine-1(2*H*)-carboxylate (**3k**, 54.7 mg, 0.2 mmol). Purification of this material by chromatography on silica gel (ethyl acetate : petroleum ether = 1 : 3) afforded product **4k** as a colorless oil (25.1 mg, 43 % yield):  $R_f = 0.4$  (ethyl acetate : petroleum ether = 1 : 3);  $^1\text{H NMR}$  ( $\text{CDCl}_3$ , 400 MHz)  $\delta$ : 7.23 (d,  $J = 7.6$  Hz, 1H), 7.13 (d,  $J = 7.7$  Hz, 0.5H), 7.01 (d,  $J = 8.2$  Hz, 0.5H), 6.87-6.75 (m, 3H), 4.92 (d,  $J = 6.0$  Hz, 0.5H), 4.88-4.80 (m, 0.5H), 4.16-4.07 (m, 2H), 3.89 (s, 1H), 3.79 (s, 3H), 3.72-3.62 (m, 1H), 3.54 (dd,  $J = 11.7, 5.7$  Hz, 1H), 3.39 (s, 1H), 2.45 (d,  $J = 22.0$  Hz, 1H), 1.77-1.62 (m, 2H), 0.97 (dt,  $J = 12.9, 7.3$  Hz, 3H);  $^{13}\text{C NMR}$  ( $\text{CDCl}_3$ , 101 MHz)  $\delta$ : 159.7, 153.9, 153.5, 143.5, 129.6, 126.0, 125.5,

120.6, 114.1, 114.0, 112.3, 112.1, 105.4, 105.3, 69.5, 67.8, 67.7, 55.1, 47.0, 45.3, 45.0, 22.1, 10.3 ppm; **HRMS** (ESI-TOF)  $m/z$  calcd for  $C_{16}H_{22}NO_4$  ( $M + H$ )<sup>+</sup>: 292.1549, found 292.1563.

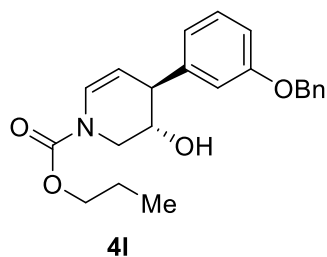

**propyl 4-(3-(benzyloxy)phenyl)-3-hydroxy-3,4-dihydropyridine-1(2H)-carboxylate (4I).** The general procedure C was followed using propyl 4-(3-(benzyloxy)phenyl)pyridine-1(2H)-carboxylate (**3I**, 69.9 mg, 0.2 mmol). Purification of this material by chromatography on silica gel (ethyl acetate : petroleum ether = 1 : 3) afforded product **4I** as a colorless oil (29.4 mg, 40 % yield):  $R_f$  = 0.6 (ethyl acetate : petroleum ether = 1 : 3); **<sup>1</sup>H NMR** ( $CDCl_3$ , 400 MHz)  $\delta$ : 7.45-7.36 (m, 4H), 7.34-7.25 (m, 2H), 7.14 (d,  $J$  = 8.4 Hz, 0.5H), 7.02 (d,  $J$  = 8.0 Hz, 0.5H), 6.94-6.83 (m, 3H), 5.06 (s, 2H), 4.89 (dd,  $J$  = 34.5, 6.9 Hz, 1H), 4.14 (s, 3H), 3.81-3.57 (m, 3H), 1.76-1.64 (m, 2H), 1.45 (d,  $J$  = 6.8 Hz, 1H), 0.98 (d,  $J$  = 7.4 Hz, 3H); **<sup>13</sup>C NMR** ( $CDCl_3$ , 101 MHz)  $\delta$ : 159.1, 154.0, 153.6, 140.8, 136.8, 129.7, 128.6, 128.0, 127.5, 126.5, 126.1, 121.6, 115.9, 113.7, 113.6, 104.7, 70.0, 67.8, 65.9, 45.9, 43.8, 29.7, 22.2, 10.4. ppm; **HRMS** (ESI-TOF)  $m/z$  calcd for  $C_{22}H_{26}NO_4$  ( $M + H$ )<sup>+</sup>: 368.1862, found 368.1851.

## 9. Further transformations for the product

### 9-1 Gram scale reaction

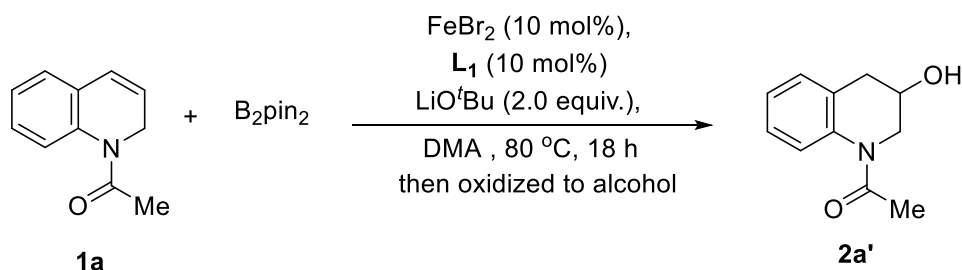

In an oven dried 100-mL Schlenk tube, which contained a stirring bar, was charged with  $FeBr_2$  (129 mg, 0.6 mmol, 10 mol%),  $L_1$  (141 mg, 0.6 mmol, 10 mol%),  $B_2pin_2$  (3.06 g, 12 mmol, 2.0 equiv.), and  $LiO^tBu$  (0.96 g, 12 mmol, 2.0 equiv.). The tube was evacuated and back-filled under a  $N_2$  flow (this sequence was repeated three times), then anhydrous DMA (30.0 mL) was added under  $N_2$ . The tube was stirred at 25 °C for 60 min. After above, **1a** (1.04 g, 6 mmol, 1.0 equiv.) was added subsequently under  $N_2$ , the tube was stirred at 80 °C for 18 h. Then, the reaction mixture was diluted with EtOAc (20.0 mL), and it was extracted with EtOAc (20.0 mL  $\times$  3). The organic layer was combined and dried over  $Na_2SO_4$ , filtered and concentrated in vacuo to get the crude product. Then the crude product was dissolved in THF (20.0 mL),  $NaBO_3 \cdot 4H_2O$  (2.77 g, 18 mmol, 3.0 equiv.) and  $H_2O$  (20.0 mL) were added, the resulting mixture was allowed to stir at 25 °C for three hours. The reaction mixture diluted with EtOAc (2.0 mL) and  $H_2O$  (2.0 mL), then it was extracted with EtOAc (2.0 mL  $\times$  3), the organic layer was combined, washed with brine and dried over  $Na_2SO_4$ , filtered and concentrated in vacuo. Purification of this material by chromatography on silica gel (ethyl acetate : petroleum ether = 1 : 3) afforded product **2a'** as a colorless oil (1.12 g , 62 % yield):  $R_f$  = 0.3 (ethyl acetate : petroleum ether = 1 : 3).

### 9-2 Procedure for synthesis of **5** <sup>[4]</sup>

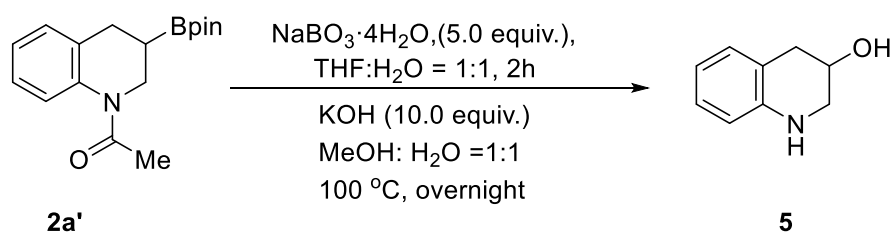

In an oven dried 10-mL Schlenk tube, which contained a stirring bar, was charged with the solution of **2a'** (60.2 mg, 0.2 mmol, 1.0 equiv.) in THF (2.0 mL),  $NaBO_3 \cdot 4H_2O$  (154 mg, 1.0 mmol, 5.0 equiv.) and  $H_2O$  (2.0 mL) were added. The resulting mixture was allowed to stir at 25 °C for three hours. The reaction mixture diluted with EtOAc (5.0 mL) and  $H_2O$  (5.0 mL). Then it was extracted with EtOAc (5.0 mL  $\times$  3). The organic layer was combined and dried over  $Na_2SO_4$ , filtered and concentrated by rotary evaporation. The resulting crude material was used in the next reaction without further purification. To a solution of this intermediate in a mixture of MeOH and  $H_2O$  (1 : 1, 5.5 mL) was added  $KOH$  (112 mg, 2.0 mmol, 10.0 equiv.) at 25 °C. The resulting mixture was heated to 100 °C. After the reaction was completed, the reaction mixture was extracted with DCM, dried over  $Na_2SO_4$ , and evaporated under reduced pressure. The residue was purified by silica gel chromatography using petroleum ether / ethyl acetate as an eluent (ethyl acetate : petroleum ether = 1 : 2) to afford product **5** as a colorless oil (26.0 mg , 87 %

yield):  $R_f = 0.3$  (ethyl acetate : petroleum ether = 1 : 2);  $^1\text{H NMR}$  ( $\text{CDCl}_3$ , 400 MHz)  $\delta$ : 7.06-6.94 (m, 2H), 6.69 (td,  $J = 7.4, 1.1$  Hz, 1H), 6.54 (d,  $J = 7.9$  Hz, 1H), 4.25 (tq,  $J = 4.5, 2.4$  Hz, 1H), 3.85 (d,  $J = 49.2$  Hz, 1H), 3.34 (d,  $J = 11.2$  Hz, 1H), 3.25 (m, 1H), 3.05 (dd,  $J = 16.5, 4.0$  Hz, 1H), 2.79 (dd,  $J = 16.9, 3.6$  Hz, 1H);  $^{13}\text{C NMR}$  ( $\text{CDCl}_3$ , 101 MHz)  $\delta$ : 143.6, 130.6, 127.0, 118.6, 118.1, 114.2, 63.4, 47.6, 35.4 ppm; **HRMS** (ESI-TOF)  $m/z$  calcd for  $\text{C}_9\text{H}_{12}\text{NO}$  ( $\text{M} + \text{H}$ ) $^+$ : 150.0919, found 150.0923.

### 9-3 Procedure for synthesis of **6** <sup>[5]</sup>

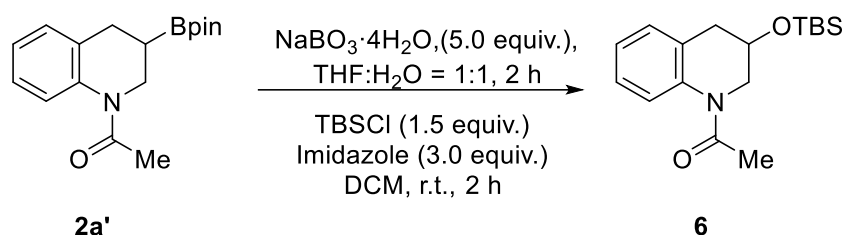

**2a'** (60.2 mg, 0.2 mmol, 1.0 equiv.) was dissolved in THF (2.0 mL),  $\text{NaBO}_3 \cdot 4\text{H}_2\text{O}$  (154 mg, 1.0 mmol, 5.0 equiv.) and  $\text{H}_2\text{O}$  (2.0 mL) were added, then the reaction was allowed to stir at 25 °C for three hours. The reaction mixture diluted with EtOAc (5.0 mL) and  $\text{H}_2\text{O}$  (5.0 mL), then it was extracted with EtOAc (5.0 mL  $\times$  3), the organic layer was combined, washed with brine and dried over  $\text{Na}_2\text{SO}_4$ , filtered and concentrated in vacuo. The resulting crude material was used in the next reaction without further purification. Then the crude product was dissolved in DCM 2 mL), then imidazole (42.0 mg, 0.6 mmol, 3.0 equiv.) and TBSCl (45.2 mg, 0.3 mmol, 1.5 equiv.) were added. After stirring at room temperature for 12 h, the reaction was quenched by addition of saturated  $\text{NaHCO}_3$  (5 mL) solution, and the resulting mixture was extracted with EtOAc (5.0 mL  $\times$  3). The organic layer was combined and dried over  $\text{Na}_2\text{SO}_4$ . Then filtered and concentrated by rotary evaporation. The residue was purified by silica gel chromatography using petroleum ether/ ethyl acetate as an eluent (ethyl acetate : petroleum ether = 1 : 10) to afford product **6** as a colorless oil (57.4 mg, 94 % yield):  $R_f = 0.5$  (ethyl acetate : petroleum ether = 1 : 10);  $^1\text{H NMR}$  ( $\text{CDCl}_3$ , 400 MHz)  $\delta$ : 7.20-6.99 (m, 4H), 4.19 (m, 1H), 3.96 (s, 1H), 3.62 (dd,  $J = 12.5, 6.5$  Hz, 1H), 3.00 (dd,  $J = 16.0, 5.1$  Hz, 1H), 2.73 (dd,  $J = 16.0, 6.4$  Hz, 1H), 2.24 (s, 3H), 0.87 (s, 9H), 0.10 (s, 6H);  $^{13}\text{C NMR}$  ( $\text{CDCl}_3$ , 101 MHz)  $\delta$ : 170.2, 138.8, 129.9, 129.2, 126.0, 125.2, 124.2, 66.6, 49.7, 37.1, 25.7, 22.9, 17.9, -4.9 ppm; **HRMS** (ESI-TOF)  $m/z$  calcd for  $\text{C}_{17}\text{H}_{28}\text{NO}_2\text{Si}$  ( $\text{M} + \text{H}$ ) $^+$ : 306.1894, found 306.1889.

### 9-4 Procedure for synthesis of **7** <sup>[6]</sup>

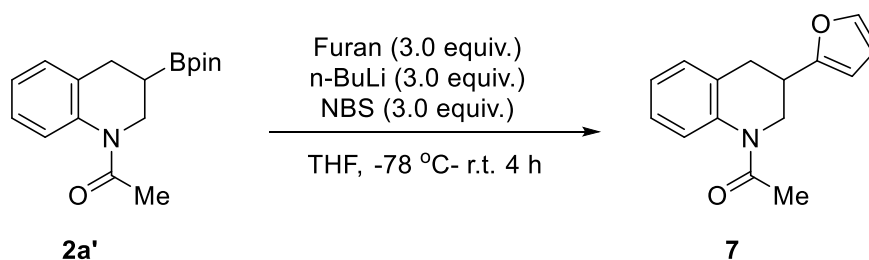

In an oven dried 25-mL Schlenk tube, which containing a stirring bar was charged with furan (40.8 mg, 0.6 mmol, 3.0 equiv.) and 1.0 mL of dry THF. Then  $n\text{BuLi}$  (2.5 M in hexane, 0.6 mL, 0.6 mmol, 3.0 equiv.) was added dropwise under -78 °C. The mixture was warmed to room

temperature and stirred for 2 h. Subsequently, the reaction mixture was cooled back to 0 °C and a solution of compound **2a'** (60.2 mg, 0.2 mmol, 1.0 equiv.) in THF (1.0 mL) was added dropwise. The resulting mixture was stirred at the same temperature for 1 h. Then a solution of NBS (107.0 mg, 0.6 mmol, 3.0 equiv.) in THF (1 mL) was added dropwise and stirred 1 h at -78 °C. After completion of the reaction, the reaction mixture was quenched with saturated solution of Na<sub>2</sub>S<sub>2</sub>O<sub>3</sub> (3 mL) at 25 °C. Then it was extracted with EtOAc (5.0 mL × 3). The organic layer was combined and dried over Na<sub>2</sub>SO<sub>4</sub>. Then filtered and concentrated by rotary evaporation. The residue was purified by silica gel chromatography using petroleum ether / ethyl acetate as an eluent (ethyl acetate : petroleum ether = 1 : 3) to afford product **7** as a colorless oil (25.1 mg, 52 % yield): *R<sub>f</sub>* = 0.3 (ethyl acetate : petroleum ether = 1 : 3); <sup>1</sup>H NMR (CDCl<sub>3</sub>, 400 MHz) δ: 7.37-7.32 (m, 1H), 7.28-7.01 (m, 4H), 6.34-6.25 (m, 1H), 6.08 (d, *J* = 3.2 Hz, 1H), 4.22 (s, 1H), 3.77 (dd, *J* = 12.6, 9.2 Hz, 1H), 3.34 (m, 1H), 3.15 (dd, *J* = 16.1, 6.0 Hz, 1H), 2.98 (dd, *J* = 15.9, 9.1 Hz, 1H), 2.21 (s, 3H); <sup>13</sup>C NMR (CDCl<sub>3</sub>, 101 MHz) δ: 170.1, 155.5, 141.6, 128.8, 126.2, 125.2, 124.5, 110.2, 105.2, 34.9, 31.9, 29.7, 23.0 ppm; HRMS (ESI-TOF) *m/z* calcd for C<sub>15</sub>H<sub>16</sub>NO<sub>2</sub> (M + H)<sup>+</sup>: 242.1181, found 242.1177.

#### 9-5 Procedure for synthesis of **8** [6]

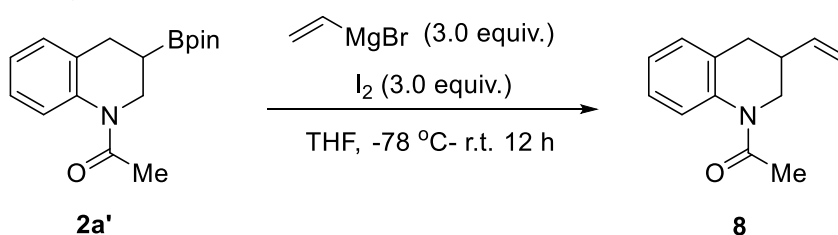

In an oven dried 10-mL Schlenk tube, which contained a stirring bar, was charged with **2a'** (60.2 mg, 0.2 mmol, 1.0 equiv.), the tube was then evacuated and back-filled under a N<sub>2</sub> flow (this sequence was repeated three times). Then THF (2.0 mL) and vinylMgBr (0.80 mL, 1 M in THF, 0.80 mmol) was added at 25 °C. The resulting mixture was allowed to stir at same temperature for 0.5 h. A solution of I<sub>2</sub> (203 mg, 0.8 mmol, 2 mL MeOH) was then slowly added to the reaction mixture at -78 °C and stirred for 0.5 h. Then a solution of NaOMe (130 mg, 2.4 mmol, 2.4 mL MeOH) was added slowly at -78 °C. The resulting mixture was then warmed to 25 °C and stirred for 1 h. The reaction mixture was quenched by saturated aqueous Na<sub>2</sub>S<sub>2</sub>O<sub>3</sub> (5 mL), then it was extracted with EtOAc (10 mL × 3). The organic layer was combined and dried over Na<sub>2</sub>SO<sub>4</sub>, filtered and concentrated by rotary evaporation. The residue was purified by silica gel chromatography (ethyl acetate : petroleum ether = 1 : 3) to afford the product **8** as a yellow oil (34.6 mg, 86% yield): *R<sub>f</sub>* = 0.4(ethyl acetate : petroleum ether = 1 : 3); <sup>1</sup>H NMR (CDCl<sub>3</sub>, 400 MHz) : 7.32-7.02 (m, 4H), 5.80 (ddd, *J* = 17.1, 10.3, 6.7 Hz, 1H), 5.17-5.06 (m, 2H), 4.03 (d, *J* = 10.4 Hz, 1H), 3.47 (dd, *J* = 12.6, 9.0 Hz, 1H), 2.90 (m, 1H), 2.63 (d, *J* = 10.5 Hz, 2H), 2.24 (s, 3H); <sup>13</sup>C NMR (CDCl<sub>3</sub>, 101 MHz) : 170.0, 139.0, 128.6, 126.0, 125.0, 124.3, 115.4, 47.5, 39.4, 33.0, 23.1 ppm; HRMS (ESI-TOF) *m/z* calcd for C<sub>13</sub>H<sub>16</sub>NO (M + H)<sup>+</sup>: 202.1232, found 202.1236.



9-6 Procedure for synthesis of **9** <sup>[7]</sup>

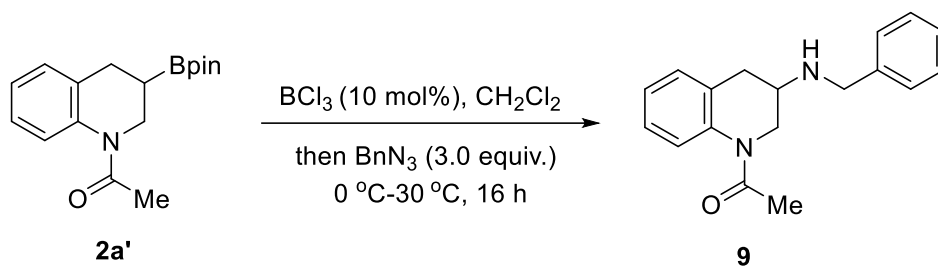

In an oven-dried reaction vial,  $\text{CH}_2\text{Cl}_2$  solution of  $\text{BCl}_3$  (1.0 M, 0.5 mL, 0.5 mmol) was added under nitrogen atmosphere. The  $\text{CH}_2\text{Cl}_2$  solution (1.0 mL) of the crude product of compound **2a'** (60.2 mg, 0.2 mmol, 1.0 equiv.) was added to the reaction vial with stirring at room temperature. After 4 h, the volatile materials were removed under reduced pressure, and dry  $\text{CH}_2\text{Cl}_2$  (1.0 mL) was added to the resultant product. The reaction vial was cooled to 0 °C, and benzylazide (80.0 mg, 0.6 mmol, 3.0 equiv.) was added to the mixture. After stirred for 16 h at 0 °C, the reaction mixture was quenched by adding NaOH aq. (2.0 M), extracted three times with EtOAc, dried over  $\text{Na}_2\text{SO}_4$ . Then filtered and concentrated by rotary evaporation. The residue was purified by silica gel chromatography using petroleum ether/ ethyl acetate as an eluent (ethyl acetate : petroleum ether = 1 : 3) to afford product **9** as a colorless oil (27.5 mg, 49 % yield):  $R_f = 0.3$  (ethyl acetate : petroleum ether = 1 : 3);  $^1\text{H NMR}$  ( $\text{CDCl}_3$ , 400 MHz)  $\delta$ : 7.33-7.08 (m, 9H), 4.06 (s, 1H), 3.87 (d,  $J = 6.3$  Hz, 2H), 3.60 (s, 1H), 3.18 (p,  $J = 5.8$  Hz, 1H), 3.03 (dd,  $J = 15.9, 5.8$  Hz, 1H), 2.63 (dd,  $J = 15.9, 7.3$  Hz, 1H), 2.23 (s, 3H), 1.62 (s, 1H);  $^{13}\text{C NMR}$  ( $\text{CDCl}_3$ , 101 MHz)  $\delta$ : 170.1, 140.0, 129.1, 128.4, 128.0, 127.0, 126.1, 125.2, 124.1, 52.8, 51.1, 34.4, 22.9 ppm; **HRMS** (ESI-TOF)  $m/z$  calcd for  $\text{C}_{18}\text{H}_{21}\text{N}_2\text{O}$  ( $\text{M} + \text{H}$ ) $^+$ : 283.1572, found 283.1567.

## 10. References.

1. M. Jiao, J. Gao and X. Fang, Enantioselective Synthesis of 4-Cyanotetrahydroquinolines via Ni-Catalyzed Hydrocyanation of 1,2-Dihydroquinolines, *Org. Lett.*, 2020, **22**, 8566.
2. K. Kubota, Y. Watanabe and H. Ito, Synthesis of Enantiomerically Enriched Chiral Tetrahydroquinolines via Sequential Dearomatization/Enantioselective Borylation Reactions, *Adv. Synth. Catal.*, 2016, **358**, 2379.
3. K. Kubota, Y. Watanabe, K. Hayama and H. Ito, Enantioselective Synthesis of Chiral Piperidines via the Stepwise Dearomatization/Borylation of Pyridines, *J. Am. Chem. Soc.*, 2016, **138**, 4338.
4. D. Kong, S. Han, G. Zi, G. Hou and J. Zhang, Enantioselective Synthesis of Boryl Tetrahydroquinolines via Cu-Catalyzed Hydroboration, *J. Org. Chem.* 2018, **83**, 1924.
5. L.-S. Zhang, G. Chen, X. Wang, Q.-Y. Guo, X.-S. Zhang, F. Pan, K. Chen and Z.-J. Shi, Direct Borylation of Primary C–H Bonds in Functionalized Molecules by Palladium Catalysis, *Angew. Chem., Int. Ed.*, 2014, **53**, 3899.
6. M. Zhang, Y. Ji, Z. Zhang and C. Zhang, Copper-Catalyzed Highly Selective Hydrosilylation of Silyl or Boryl Alkene: A Method for Preparing Chiral Geminated Disilyl and Borylsilyl Reagents, *Org. Lett.*, 2022, **24**, 2756.
7. E. Hupe, I. Marek, P. Knochel, Diastereoselective Reduction of Alkenylboronic Esters as a New Method for Controlling the Stereochemistry of up to Three Adjacent Centers in Cyclic and Acyclic Molecules, *Org. Lett.*, 2002, **4**, 2861.

## 11. NMR spectra of products.

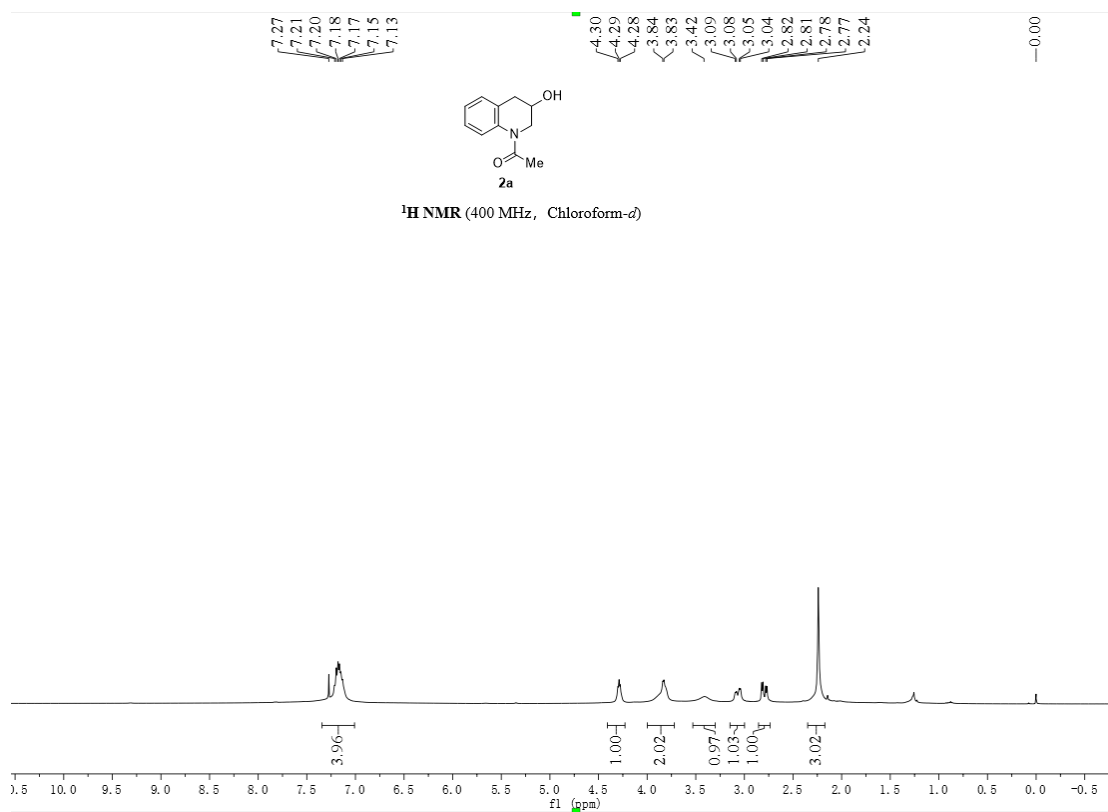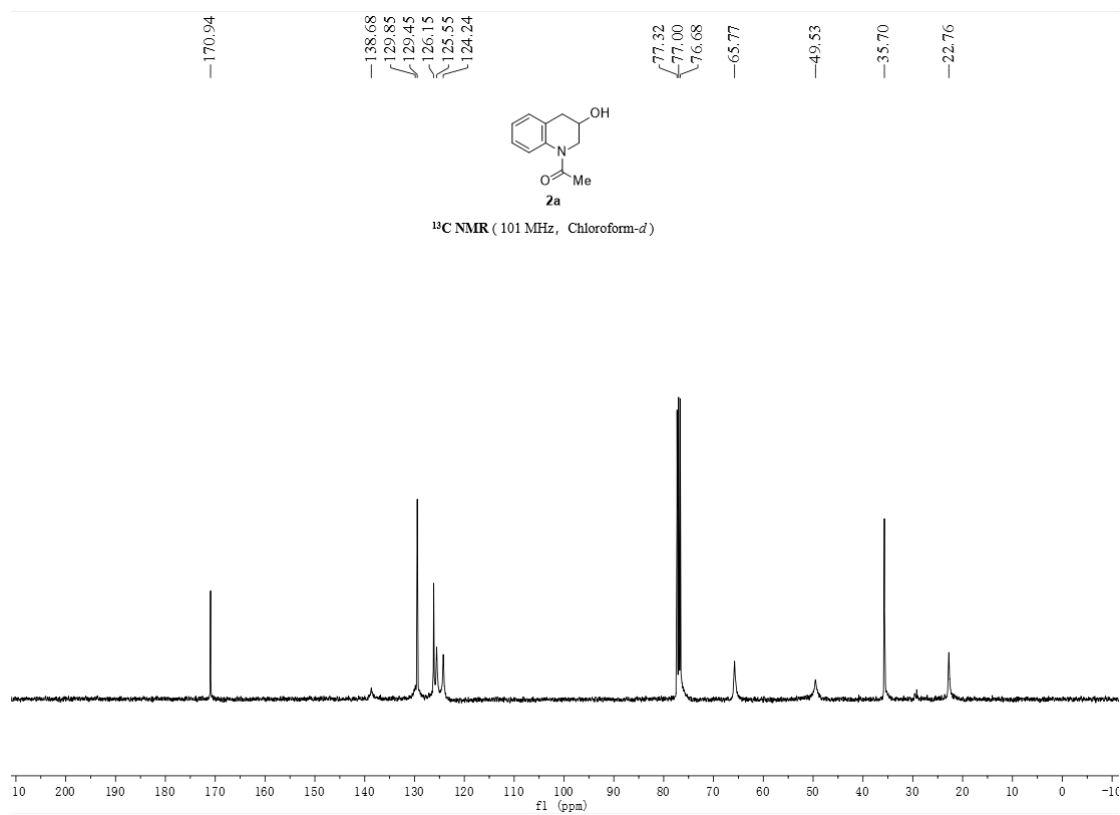

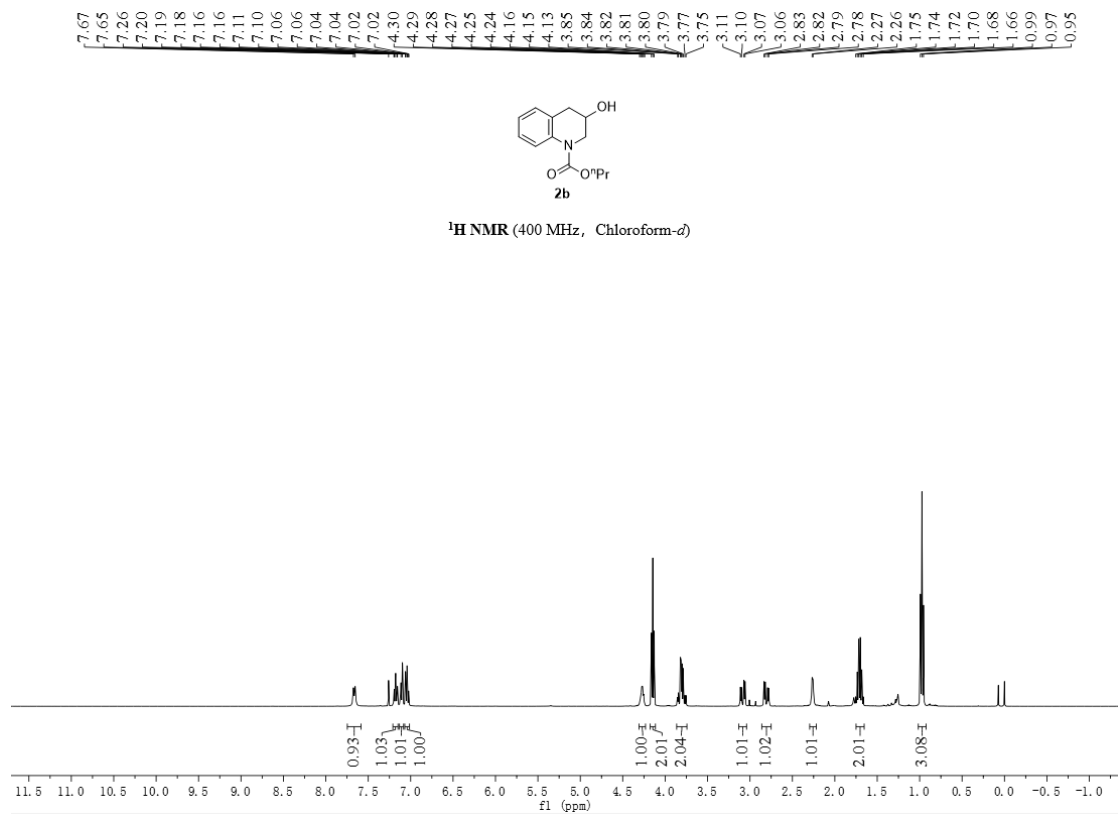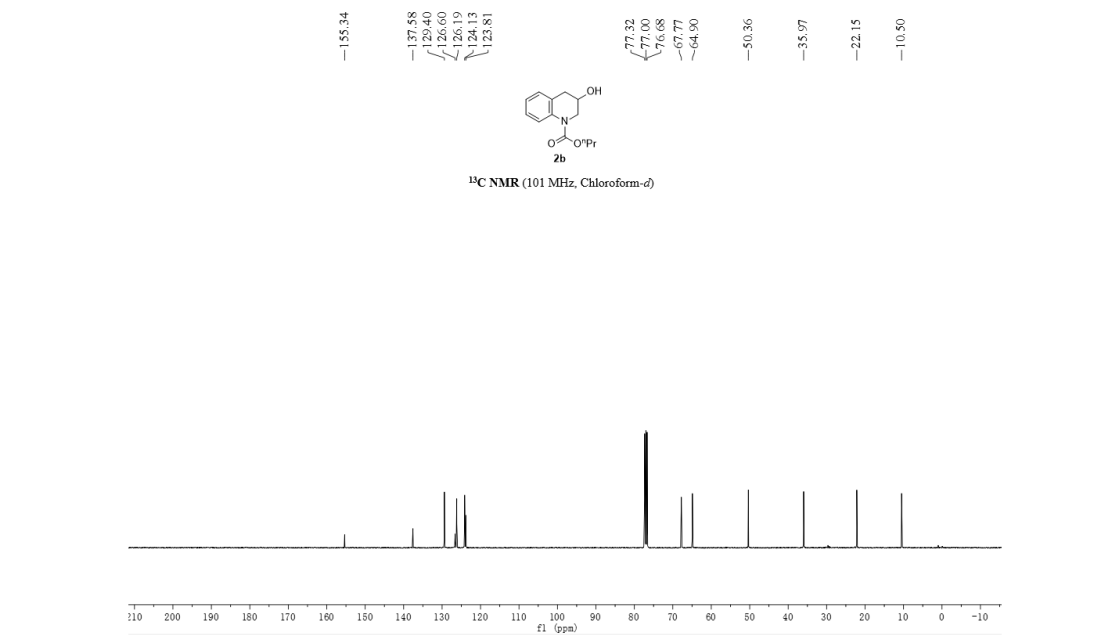

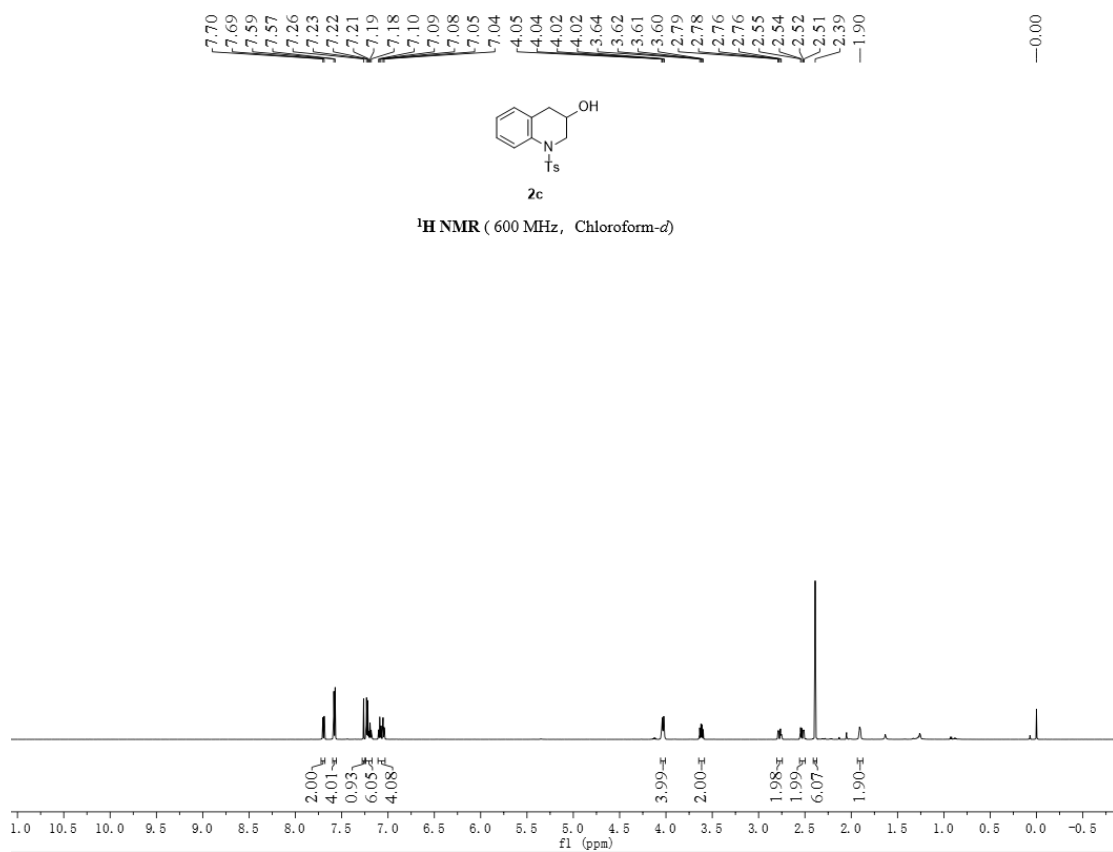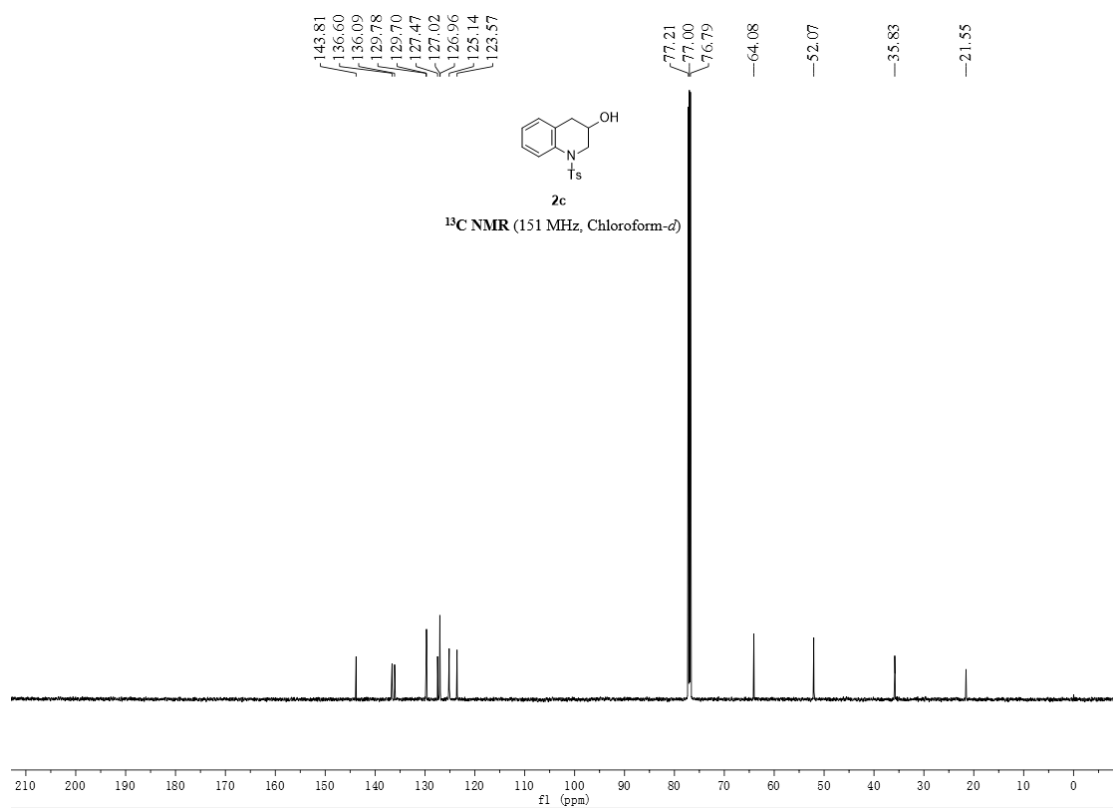

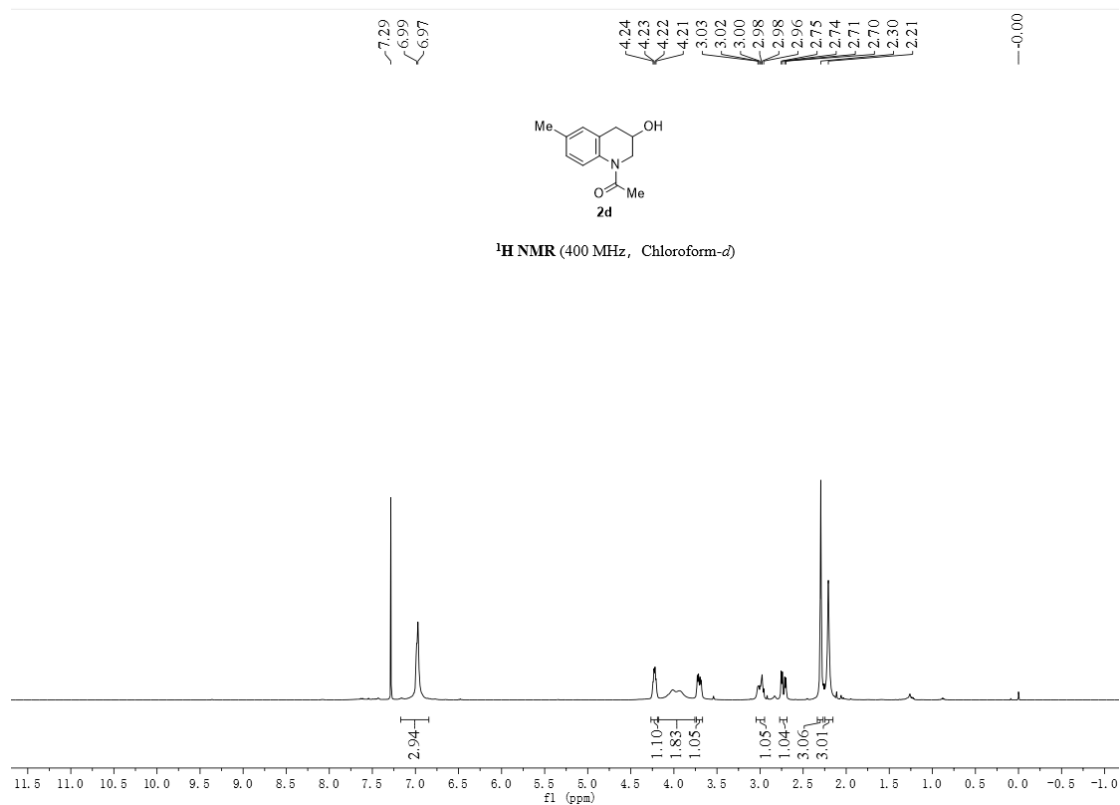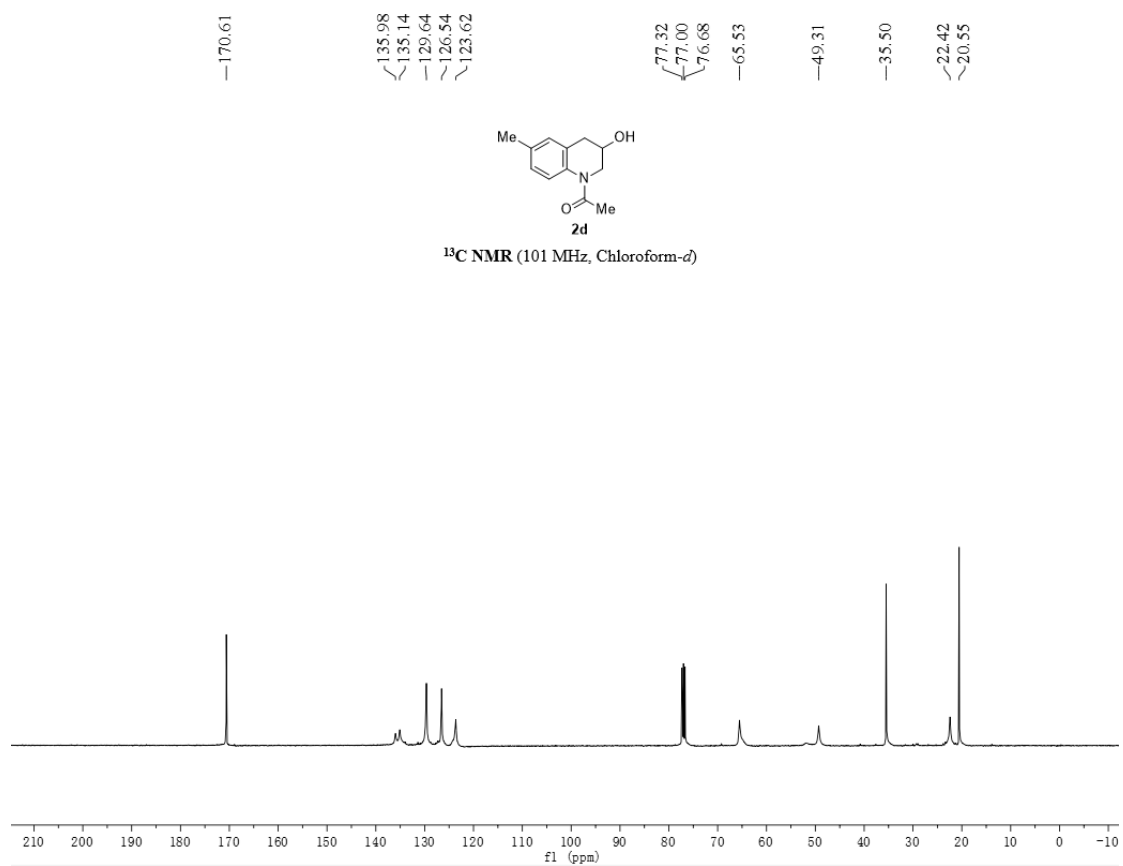

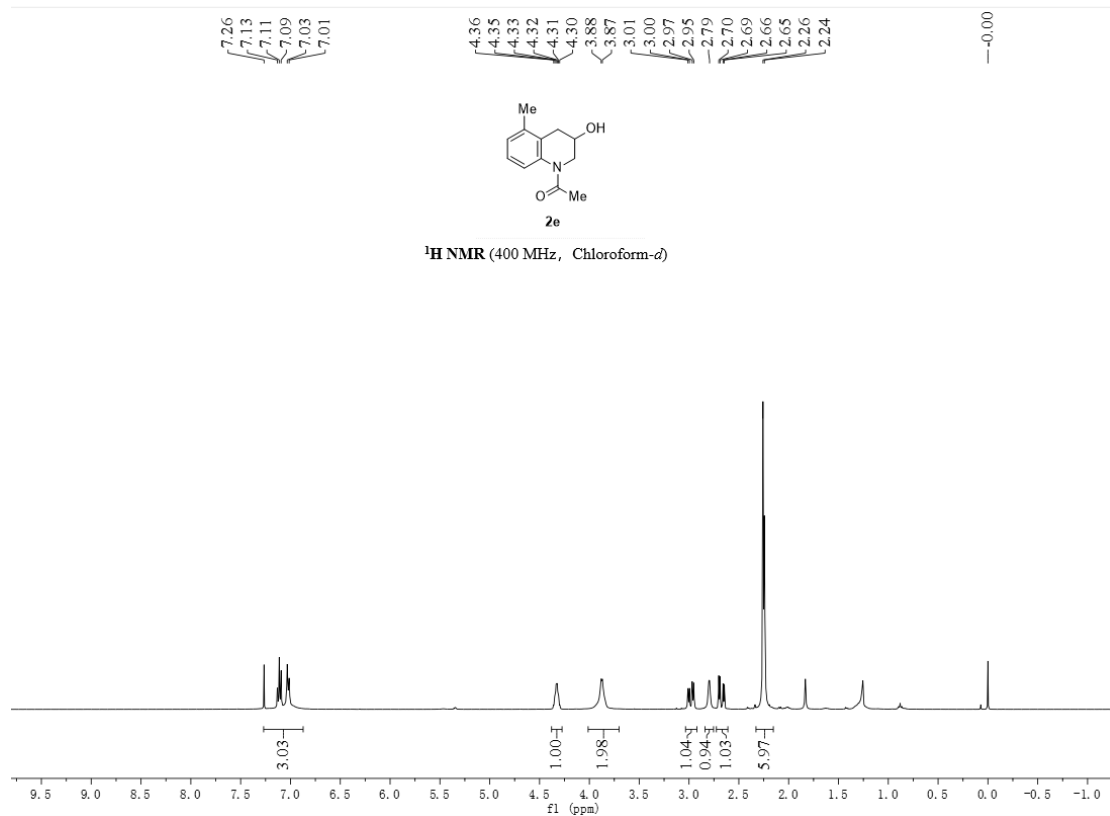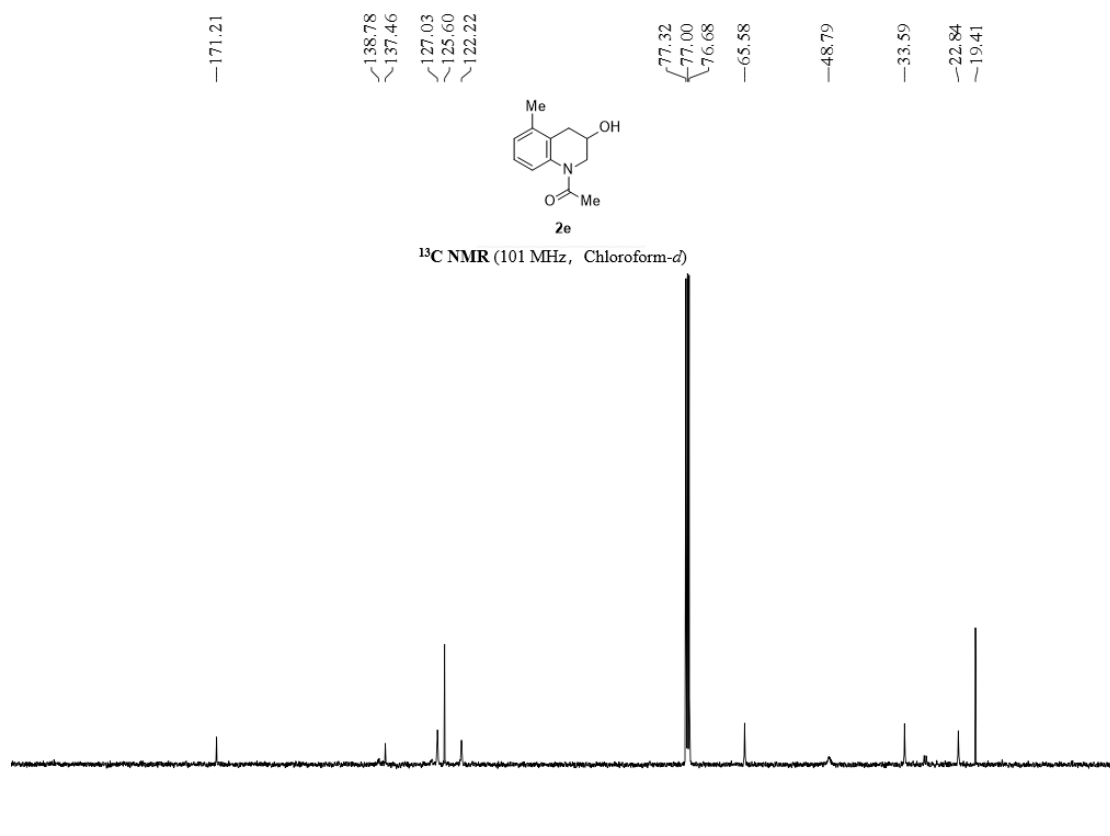

7.27  
7.07  
7.05  
6.96  
6.95

4.32  
4.31  
4.29  
4.28  
4.27  
3.01  
3.00  
2.95  
2.78  
2.77  
2.74  
2.72  
2.33  
2.25

-0.00

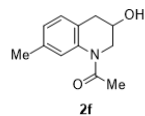

<sup>1</sup>H NMR (400 MHz, Chloroform-d)

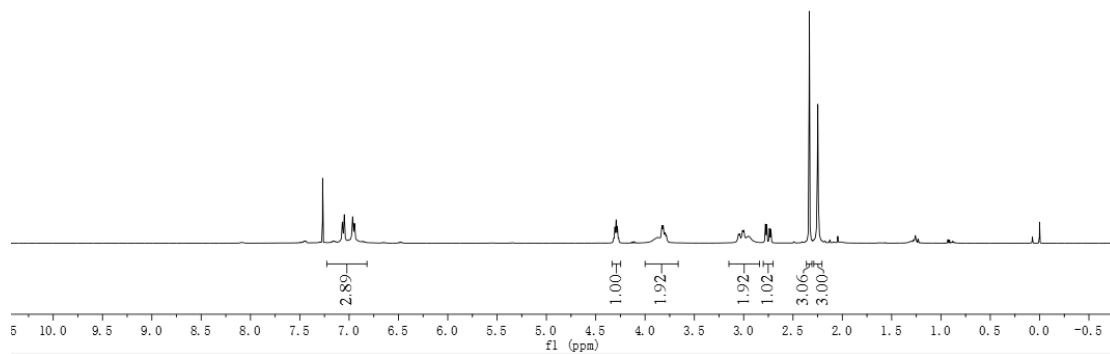

-170.87

138.58  
138.54  
136.02  
129.24  
126.42  
124.79

77.32  
77.00  
76.68  
66.04

-49.70

-35.39

22.83

21.15

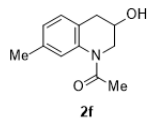

<sup>13</sup>C NMR (101 MHz, Chloroform-d)

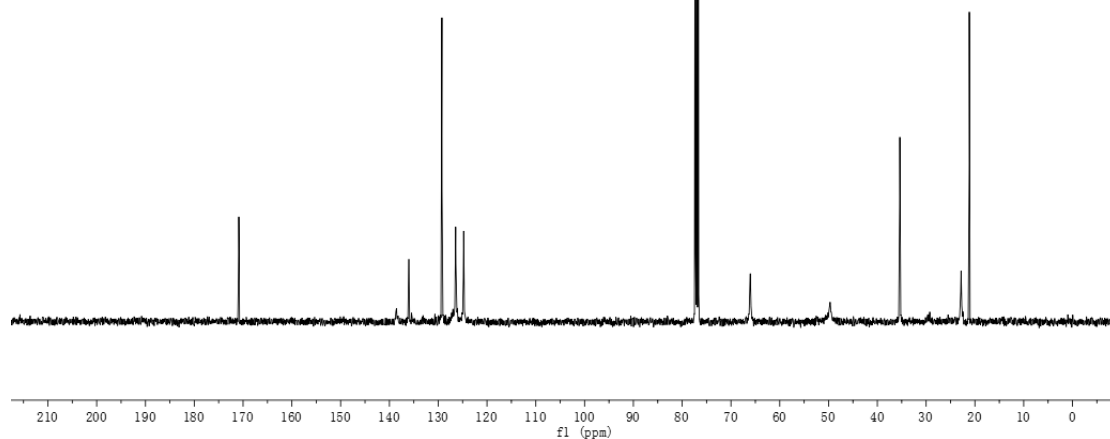



7.27  
7.03  
6.77  
6.76  
6.75  
6.74  
6.71

4.33  
4.32  
4.31  
3.91  
3.84  
3.79  
3.04  
3.01  
2.80  
2.79  
2.76  
2.75  
2.64  
2.21

-0.00

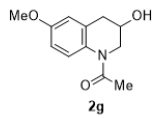

<sup>1</sup>H NMR (400 MHz, Chloroform-*d*)

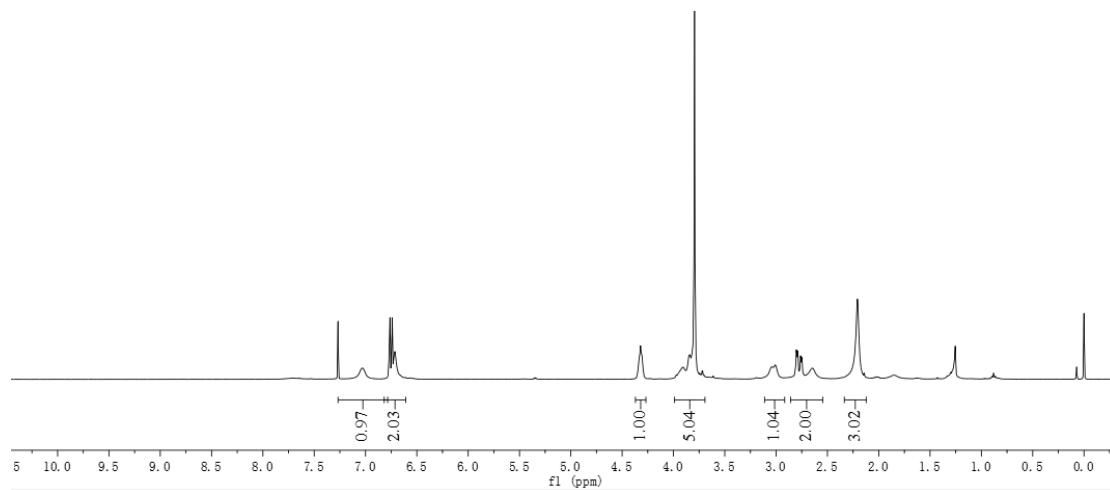

170.90  
157.35  
132.08  
131.55  
125.12  
114.13  
111.95  
77.32  
77.00  
76.68  
66.17  
55.41  
49.57  
36.01  
22.51

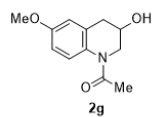

<sup>13</sup>C NMR (101 MHz, Chloroform-*d*)

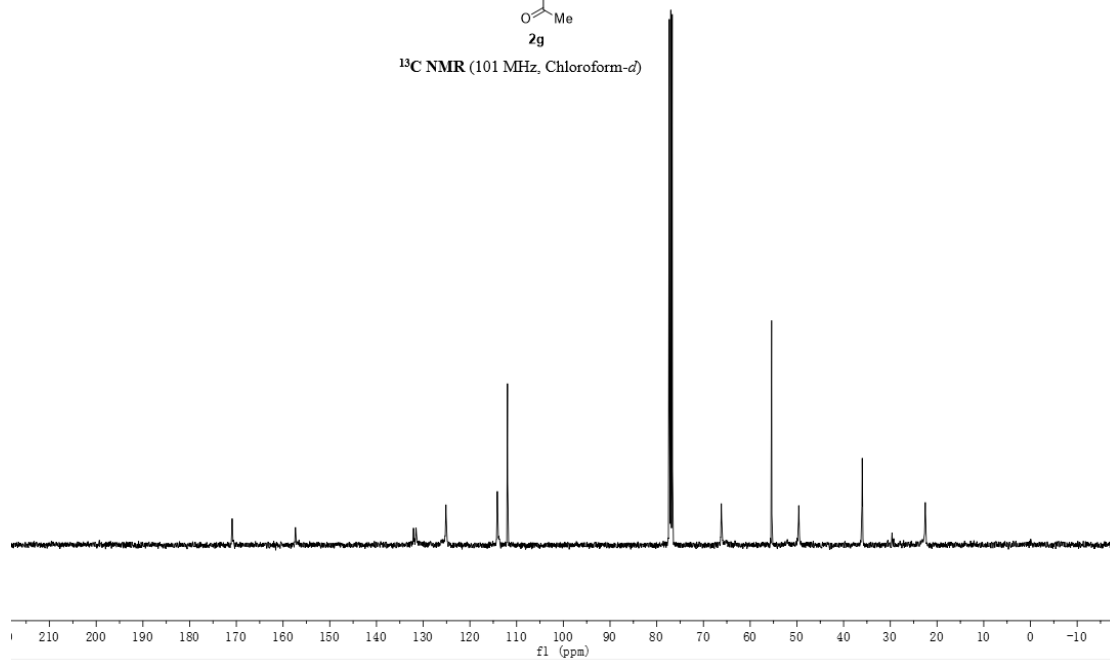

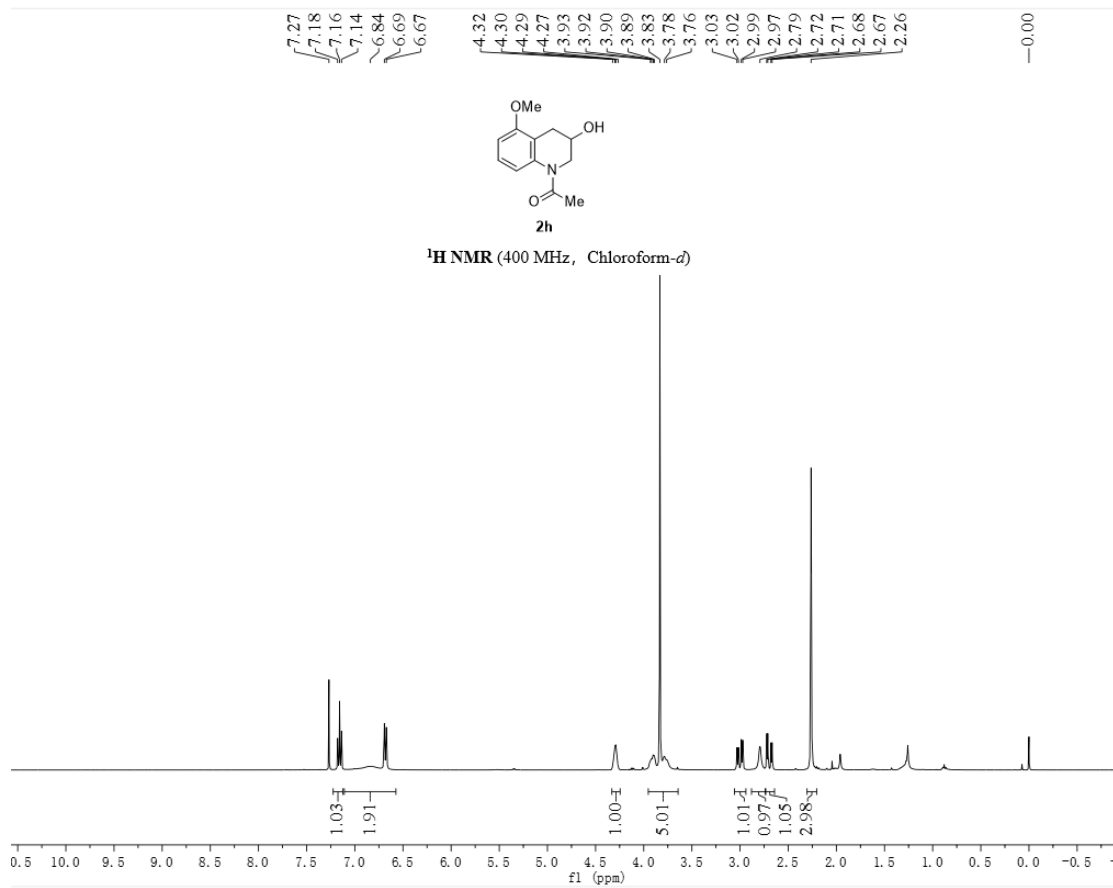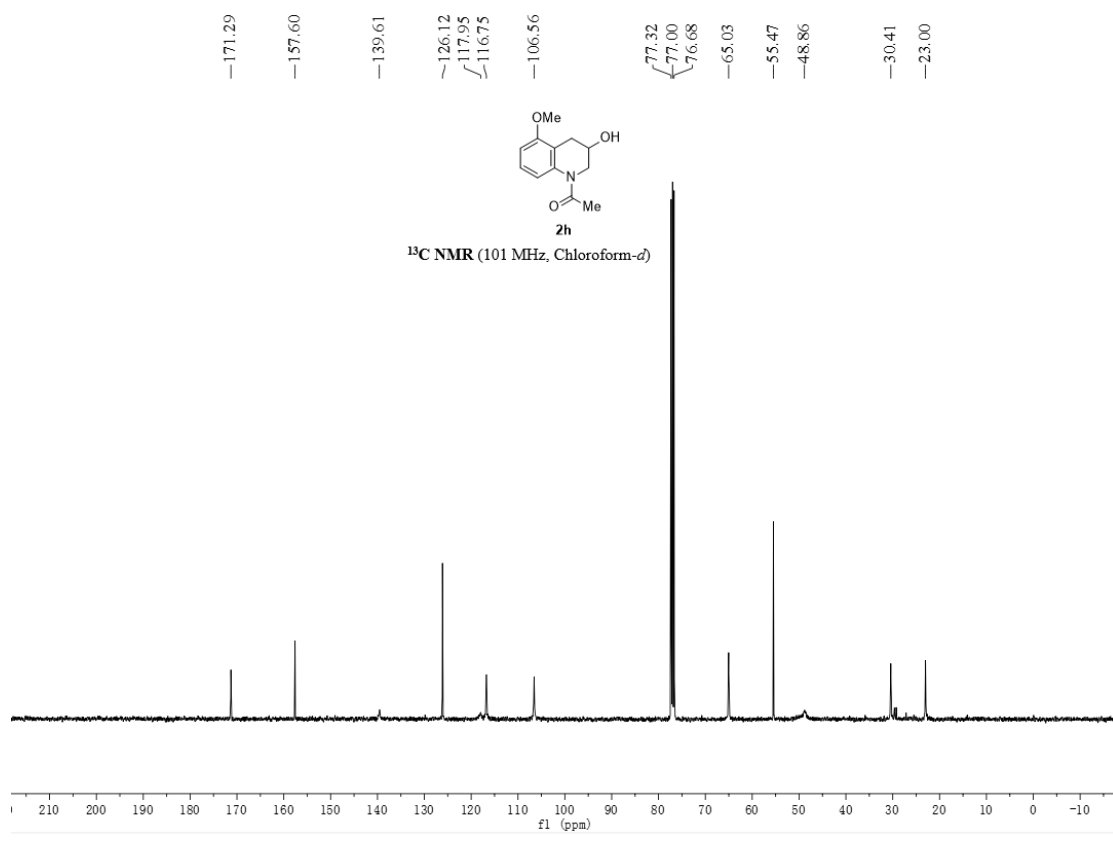

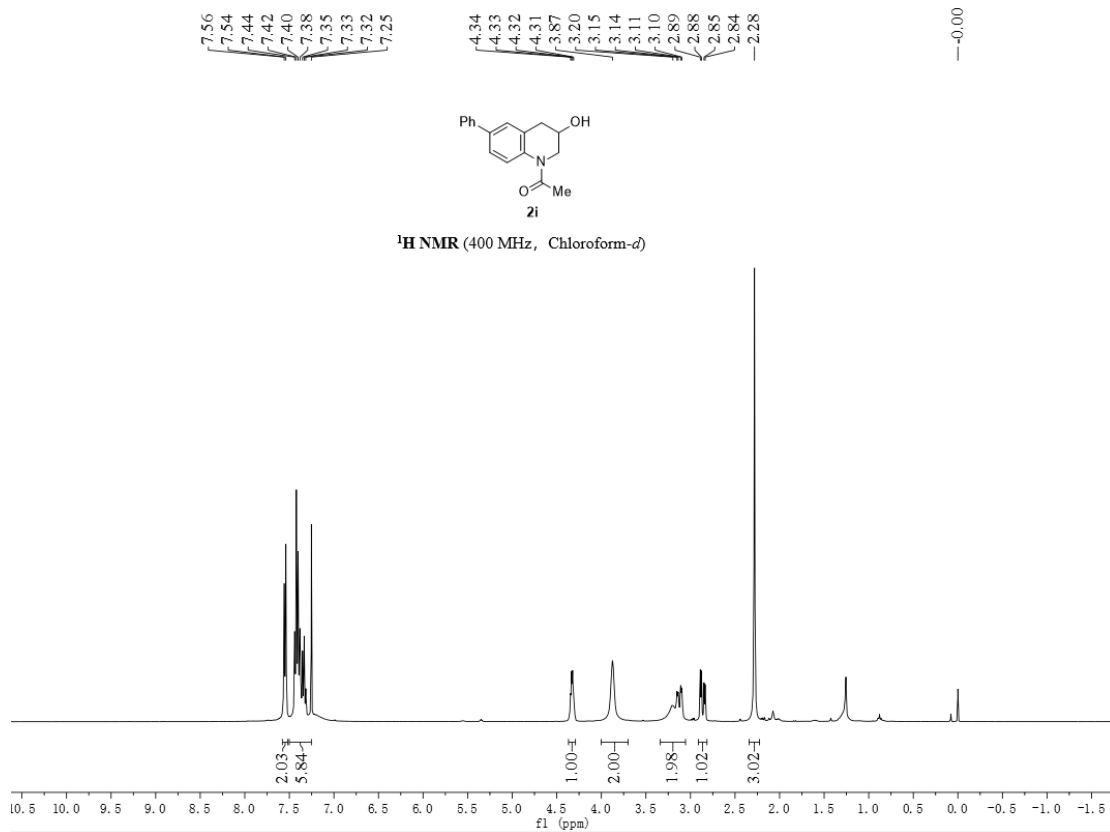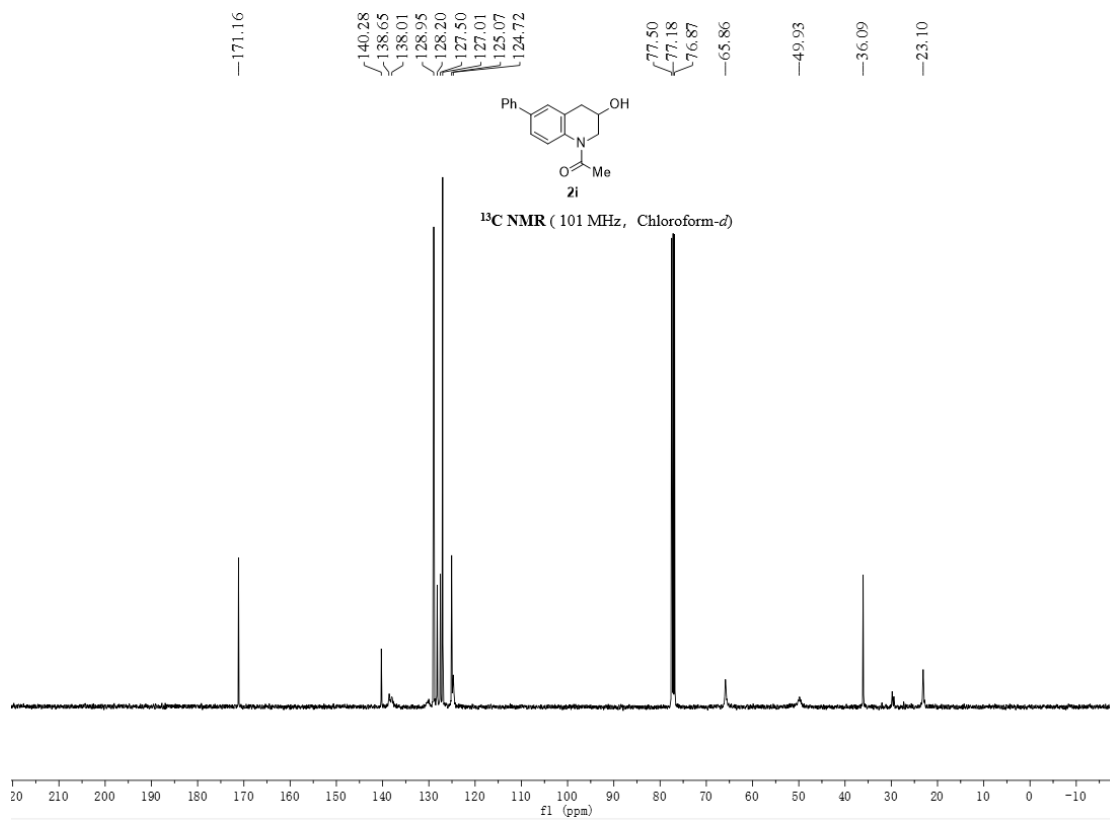

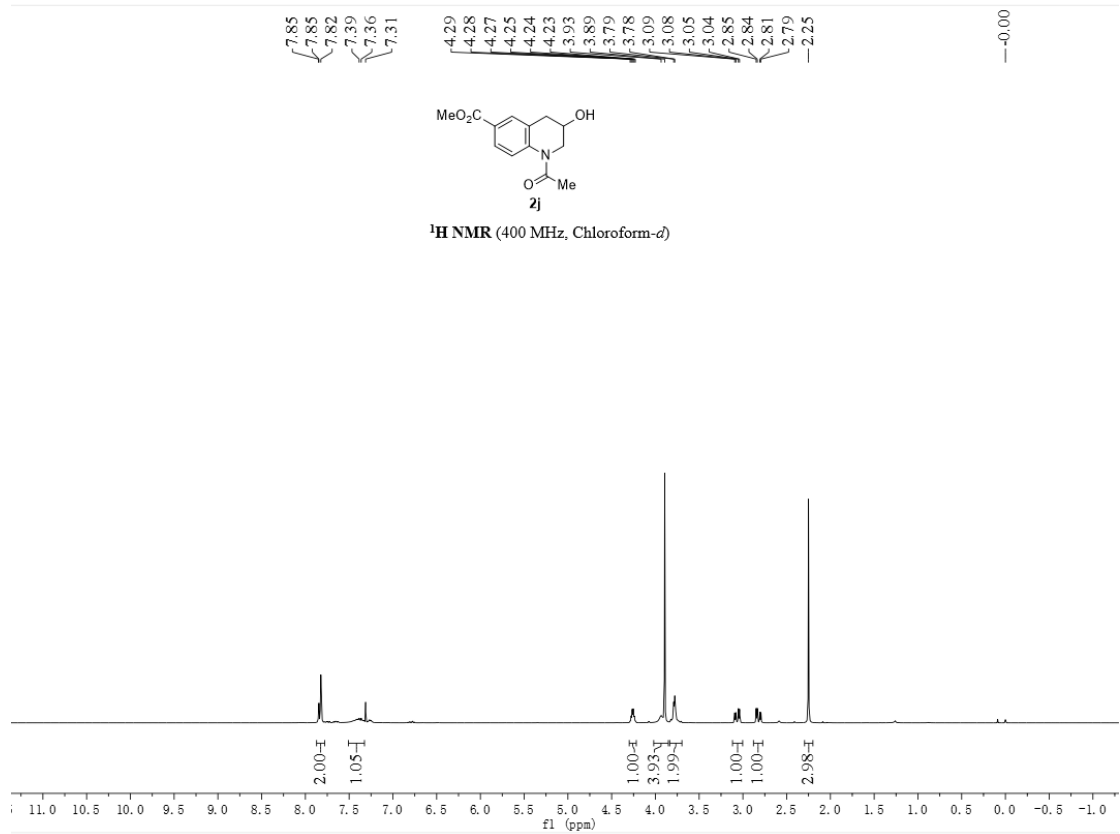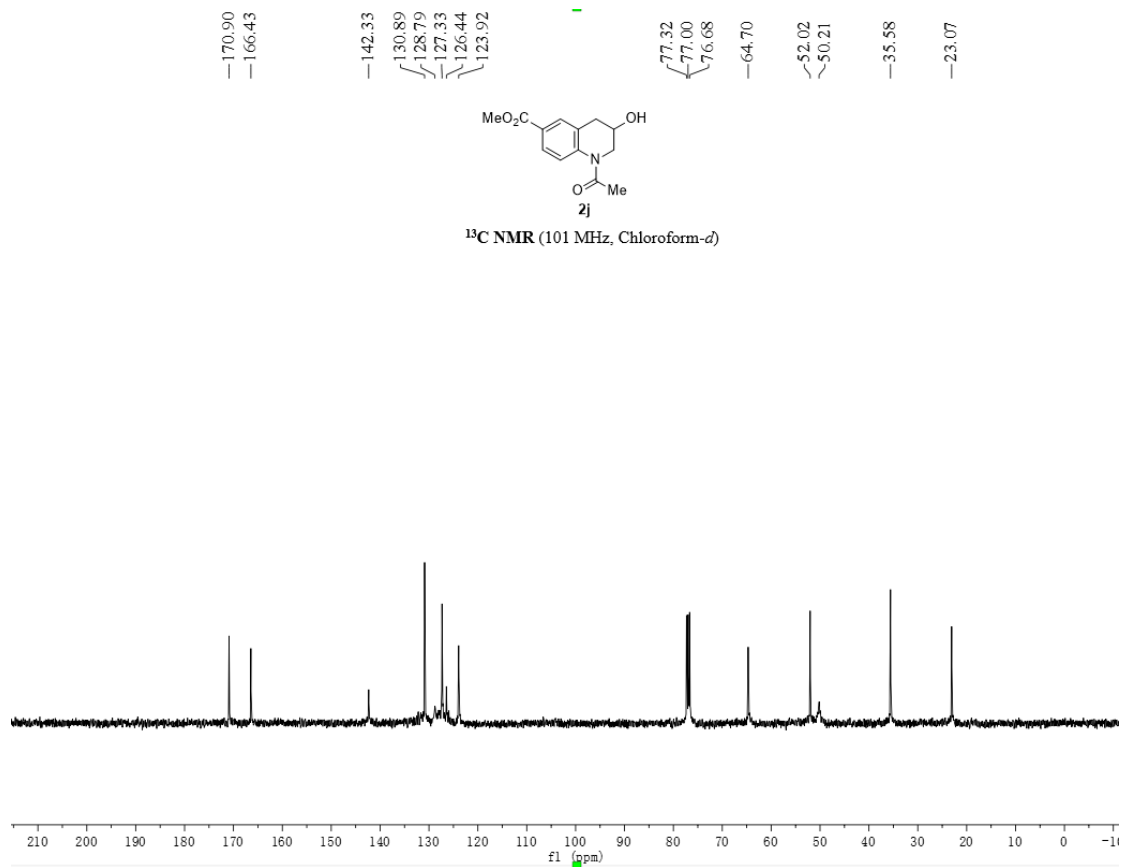

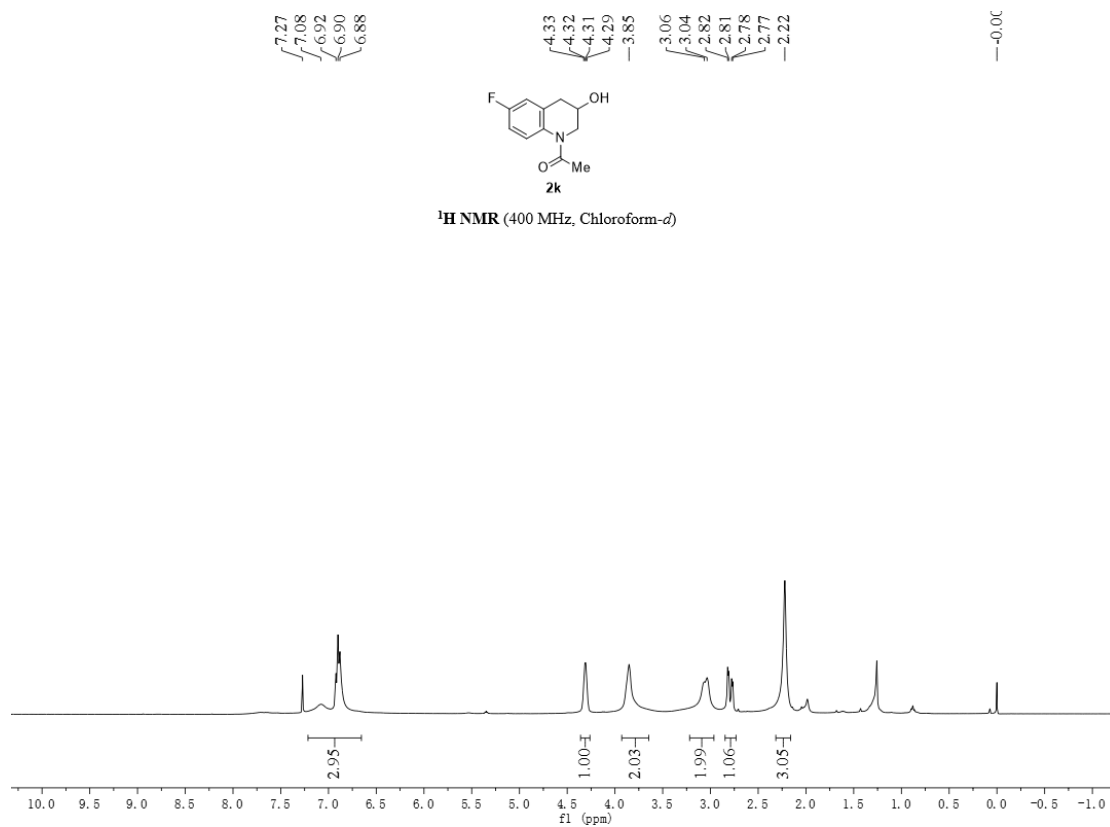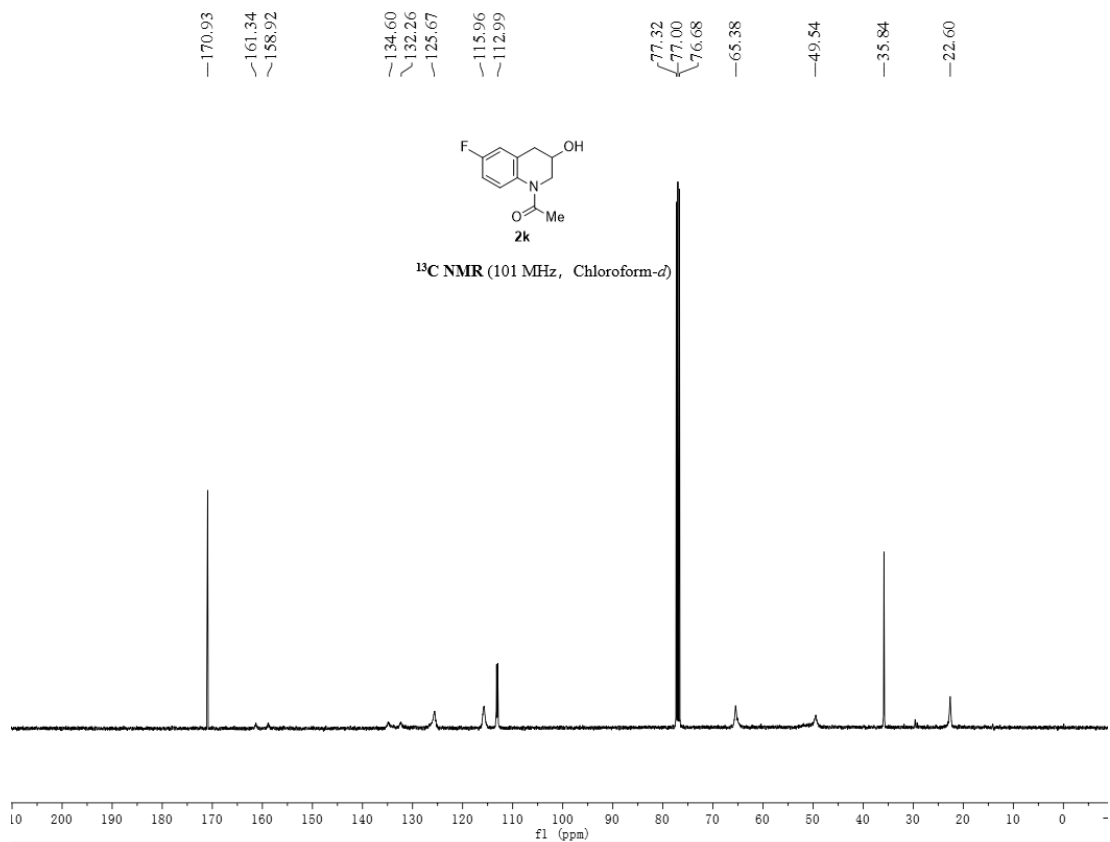

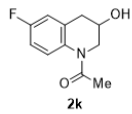

<sup>19</sup>F NMR (376 MHz, Chloroform-*d*)

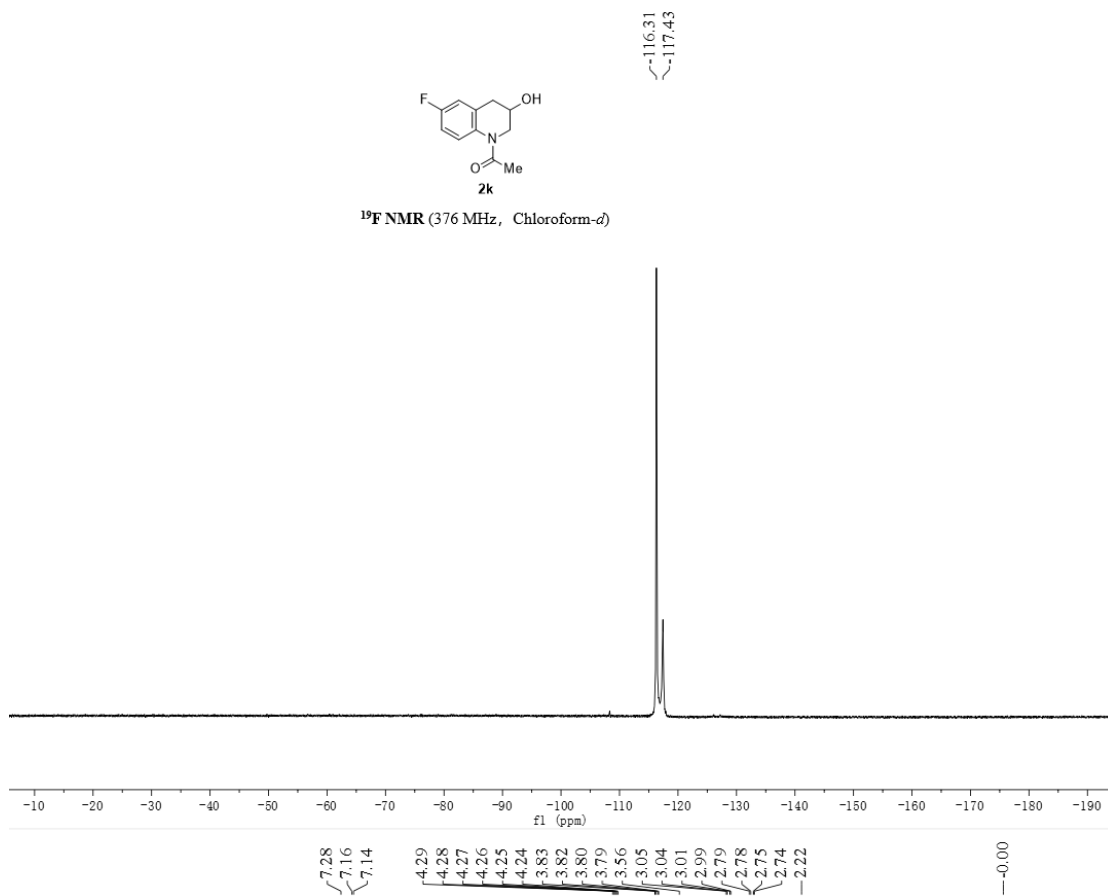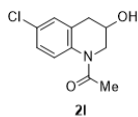

<sup>1</sup>H NMR (400 MHz, Chloroform-*d*)

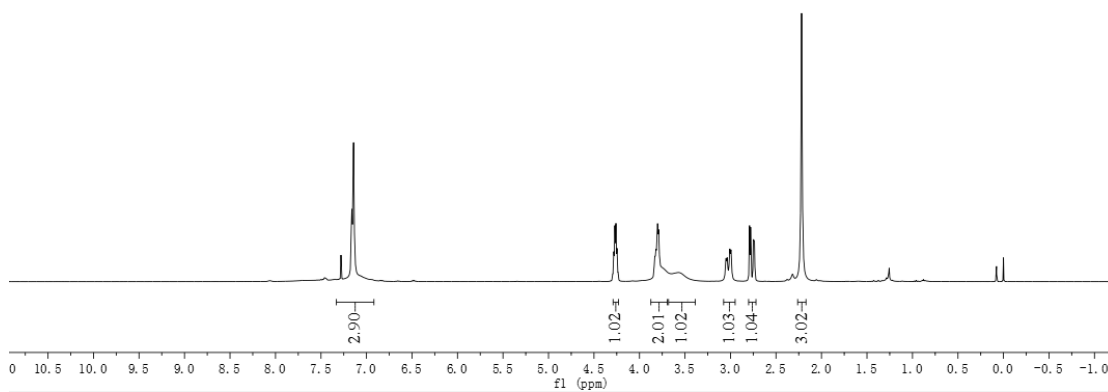

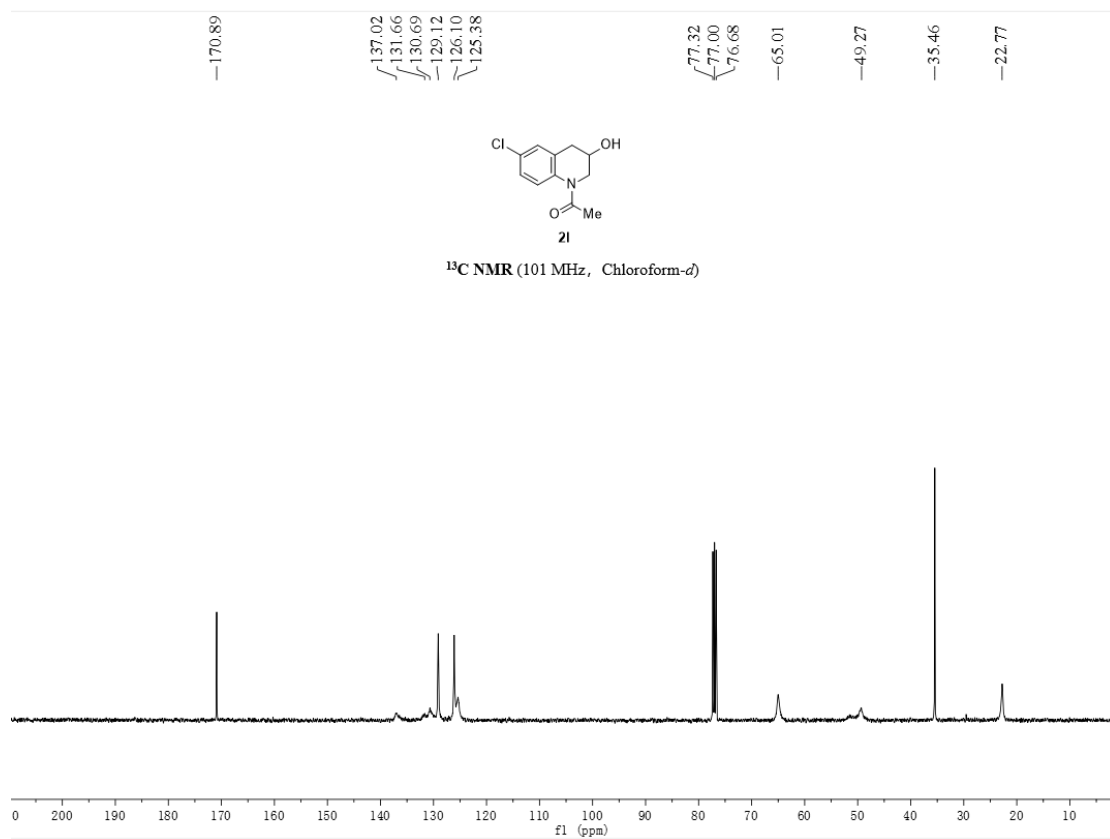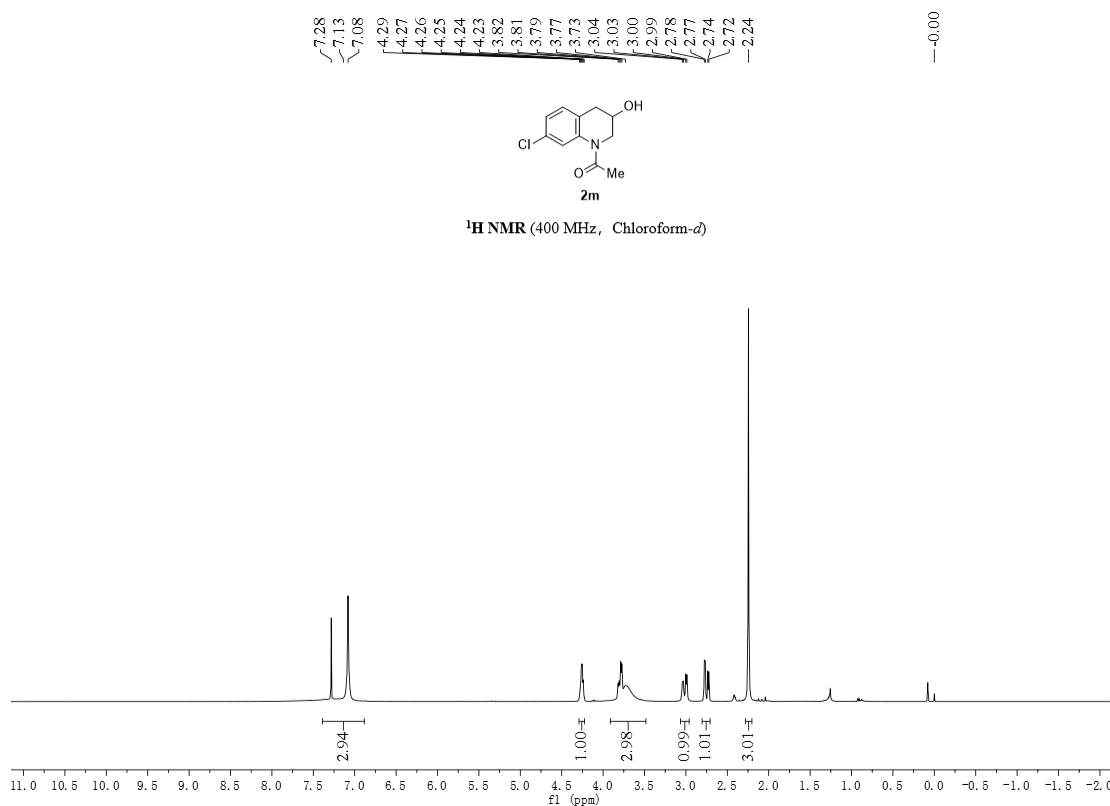

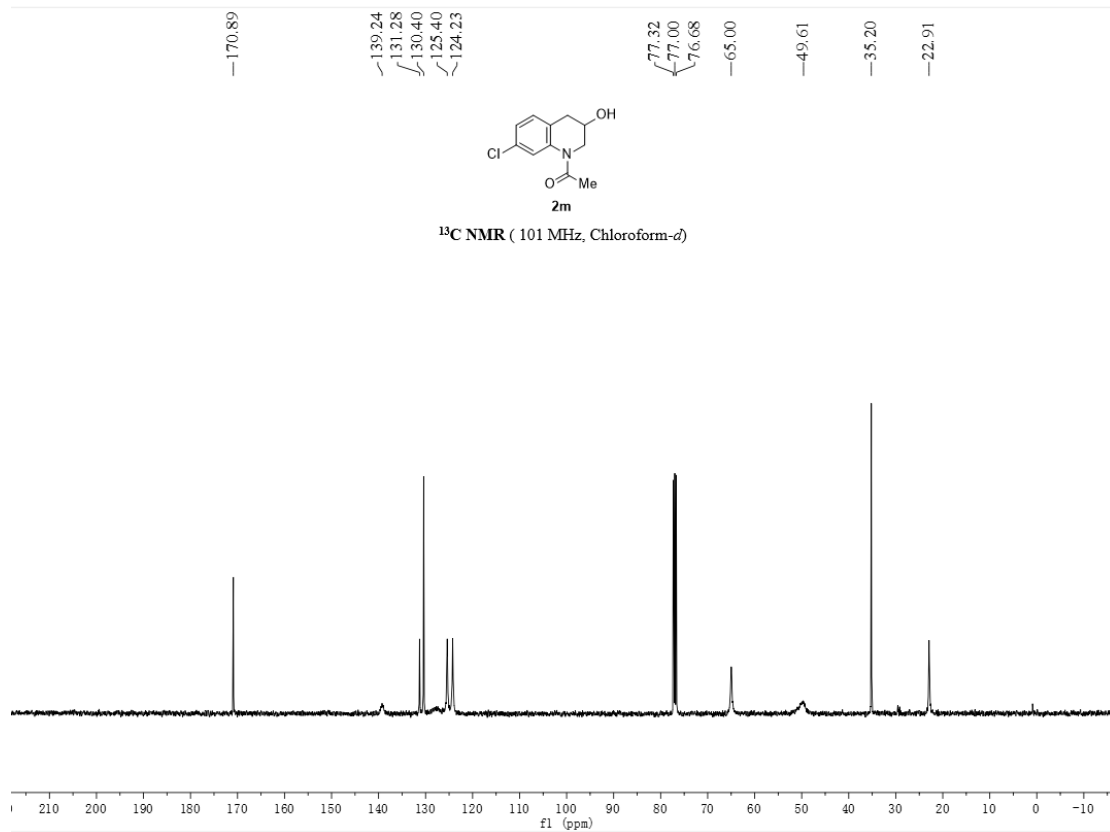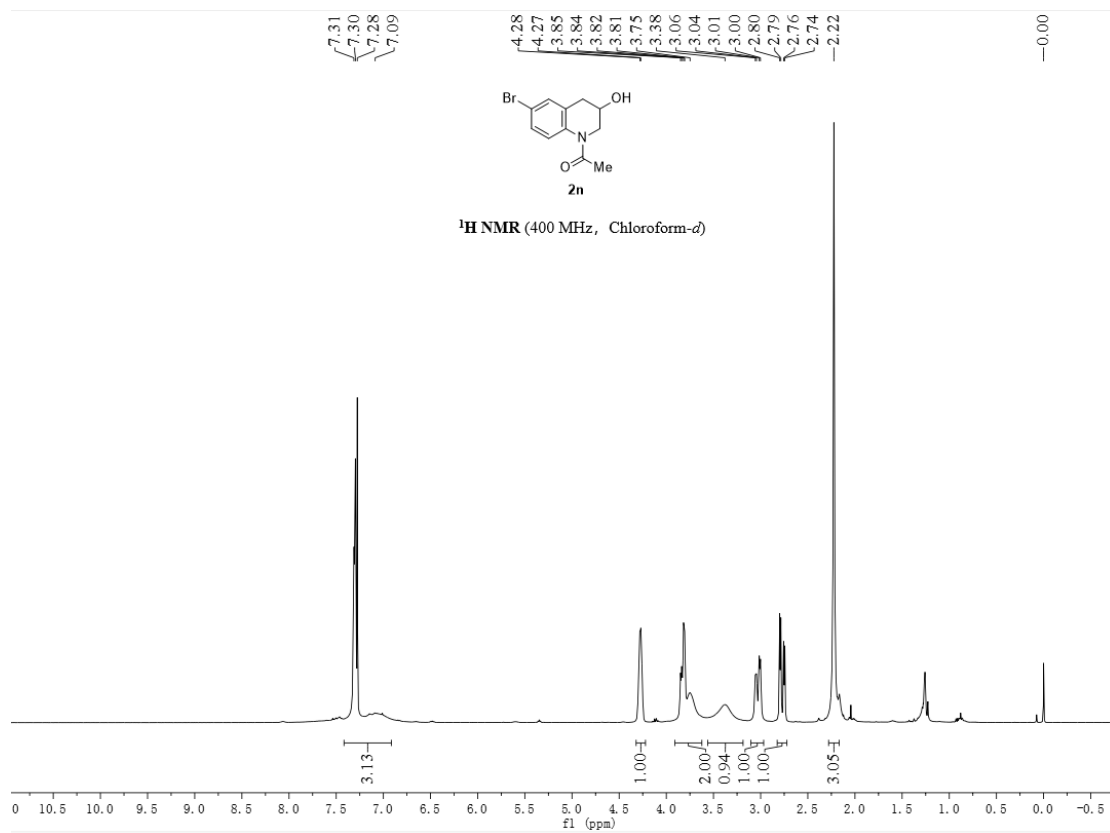



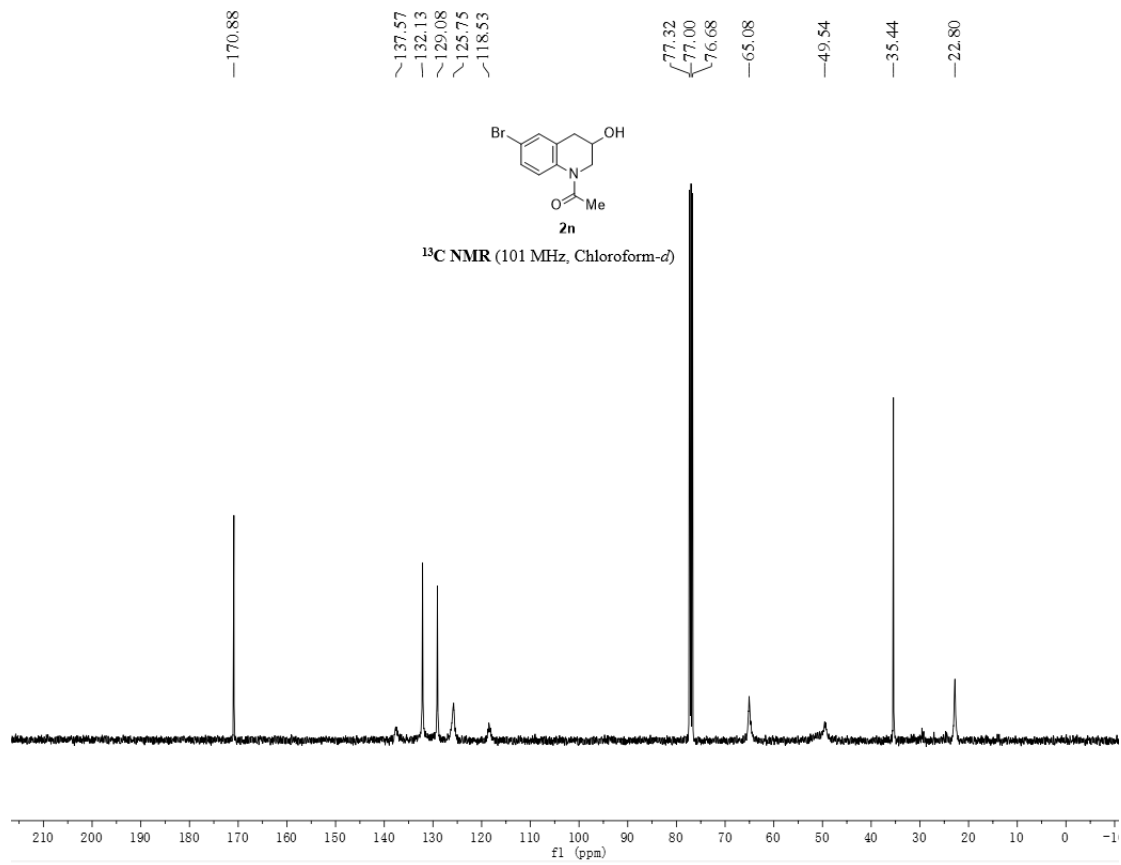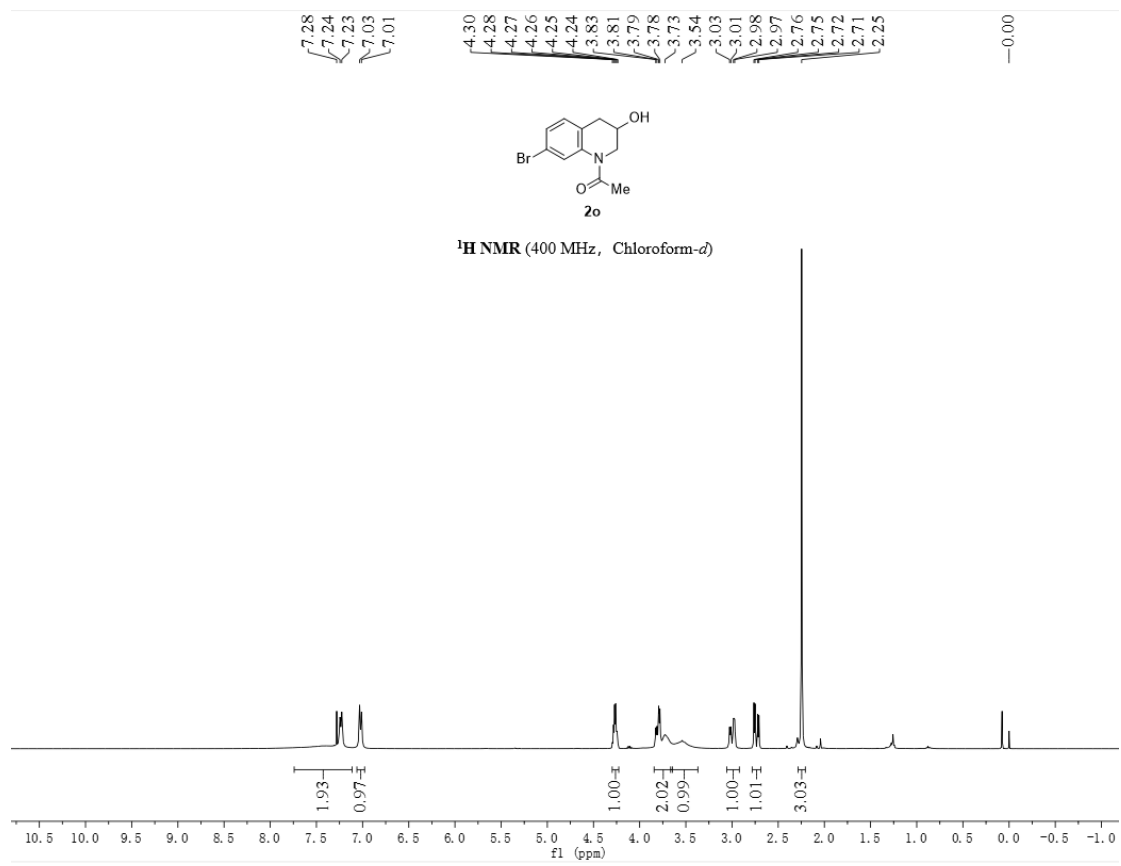

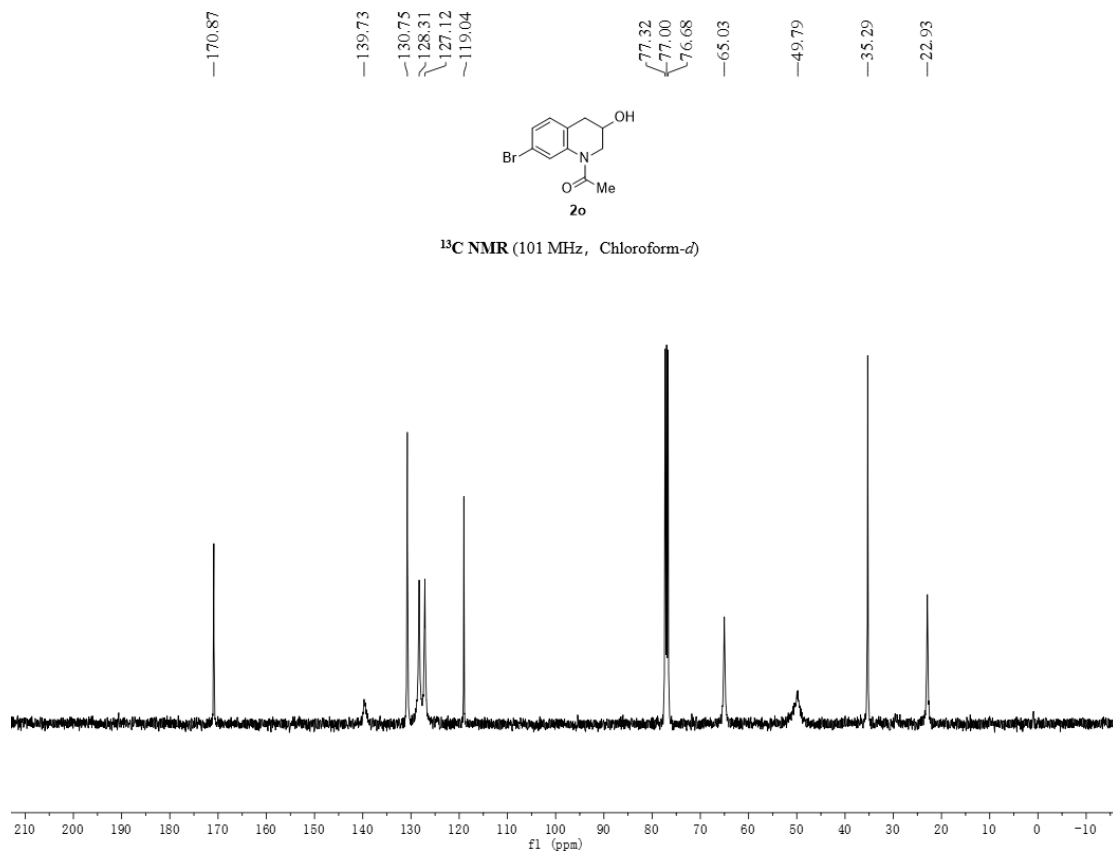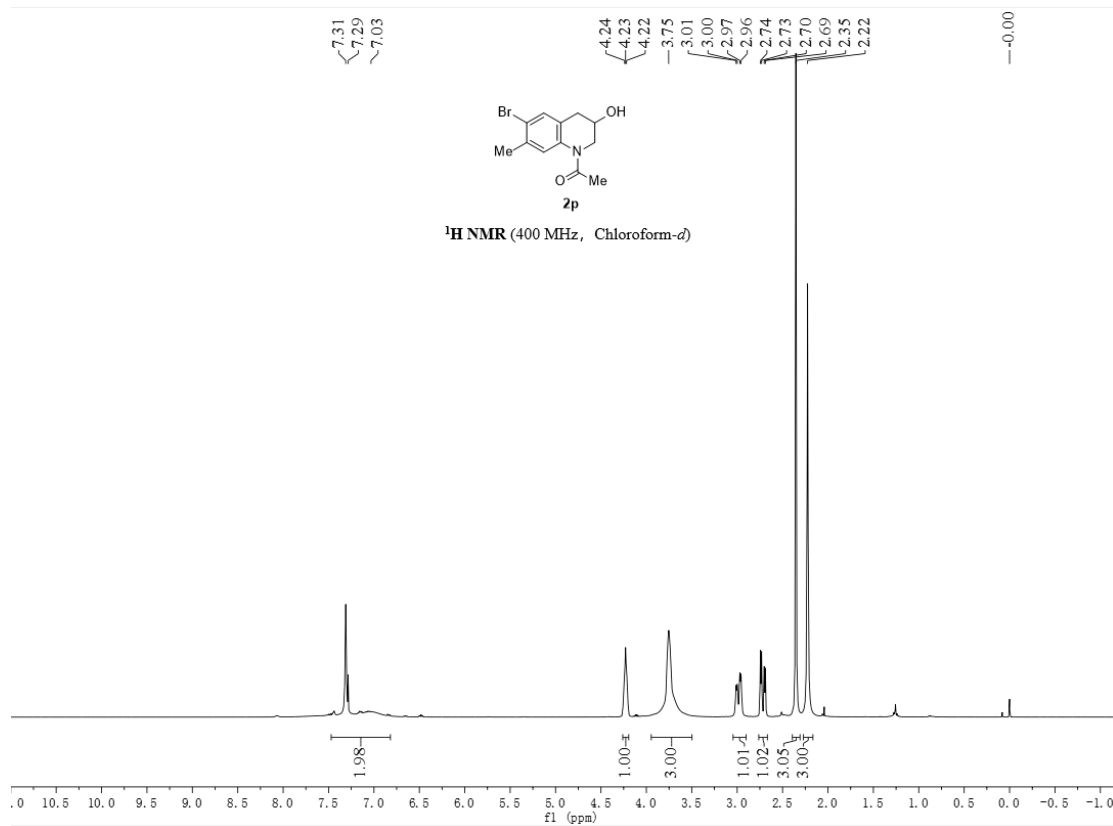

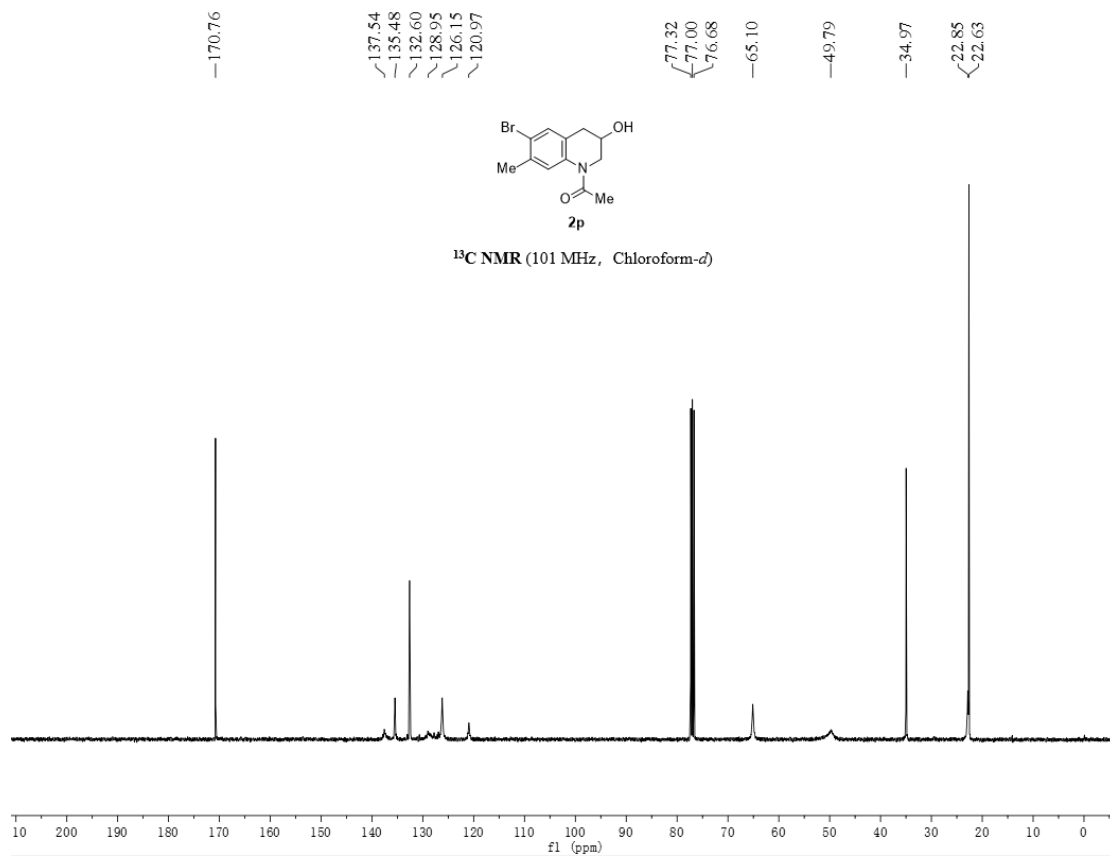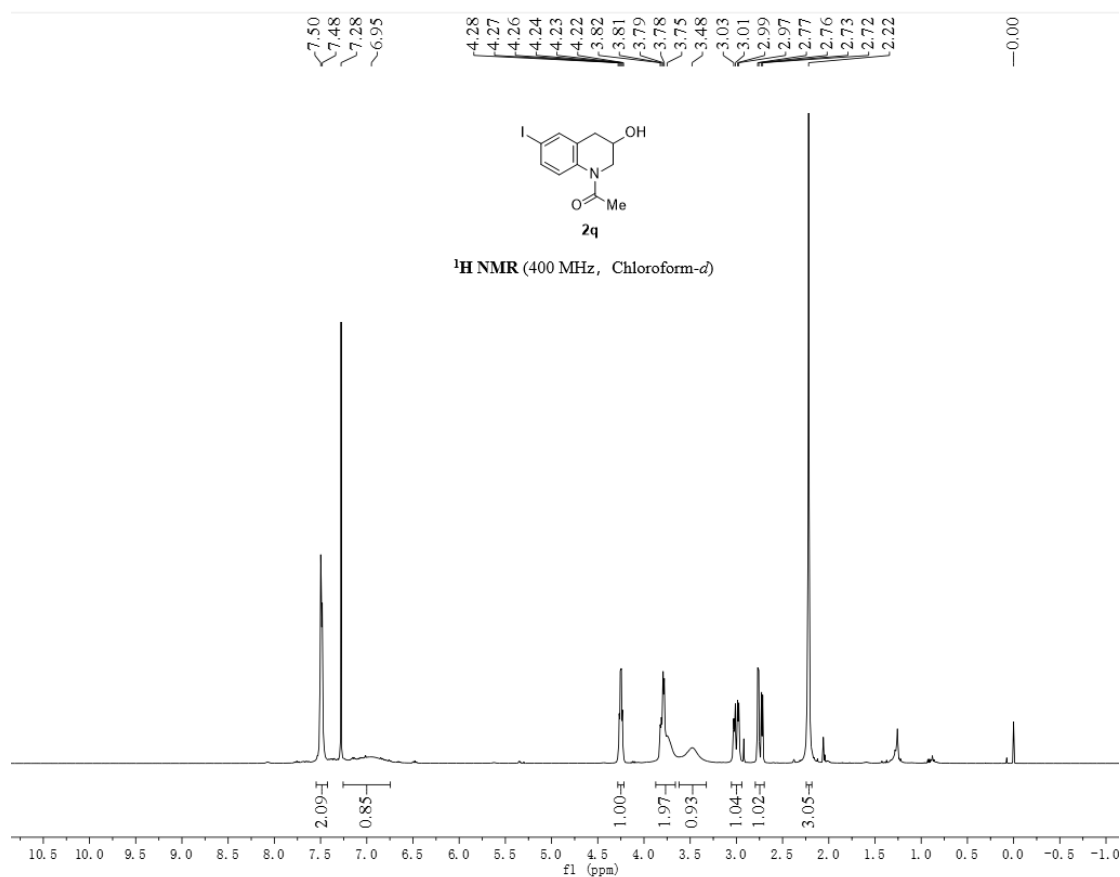

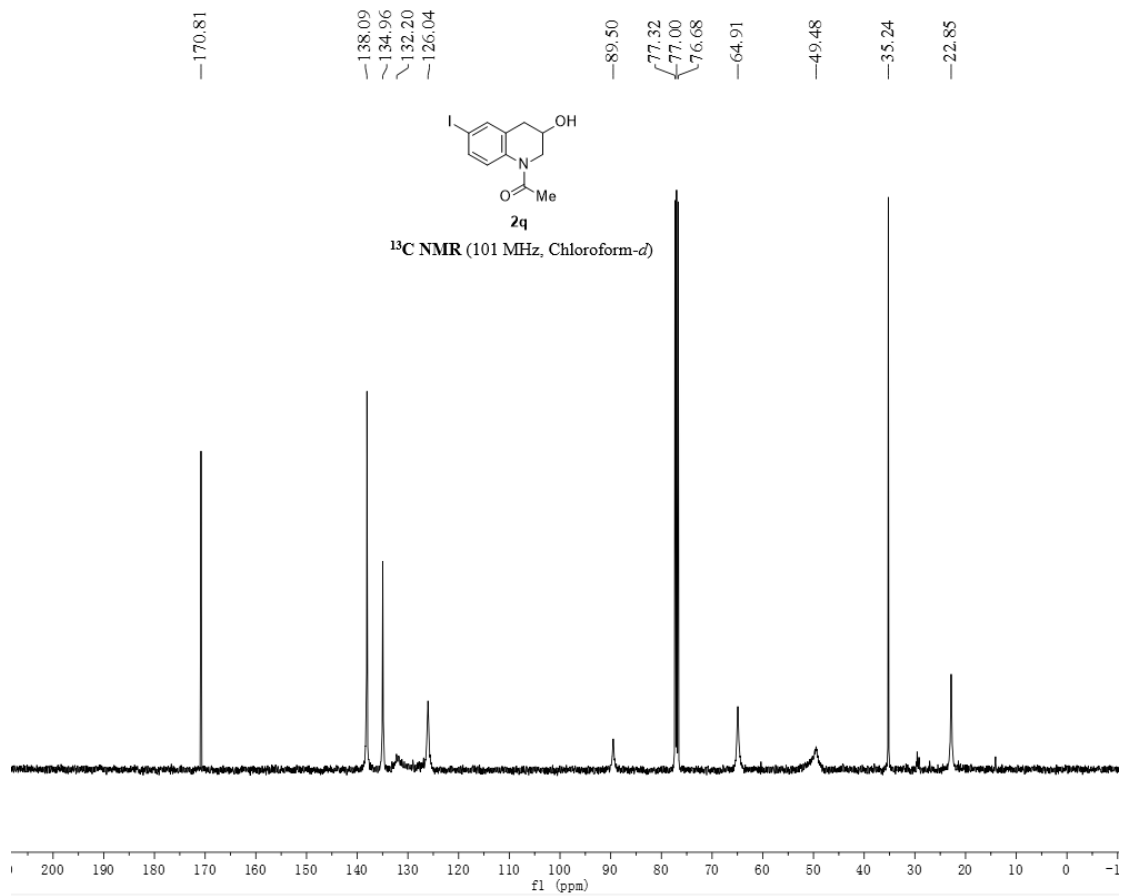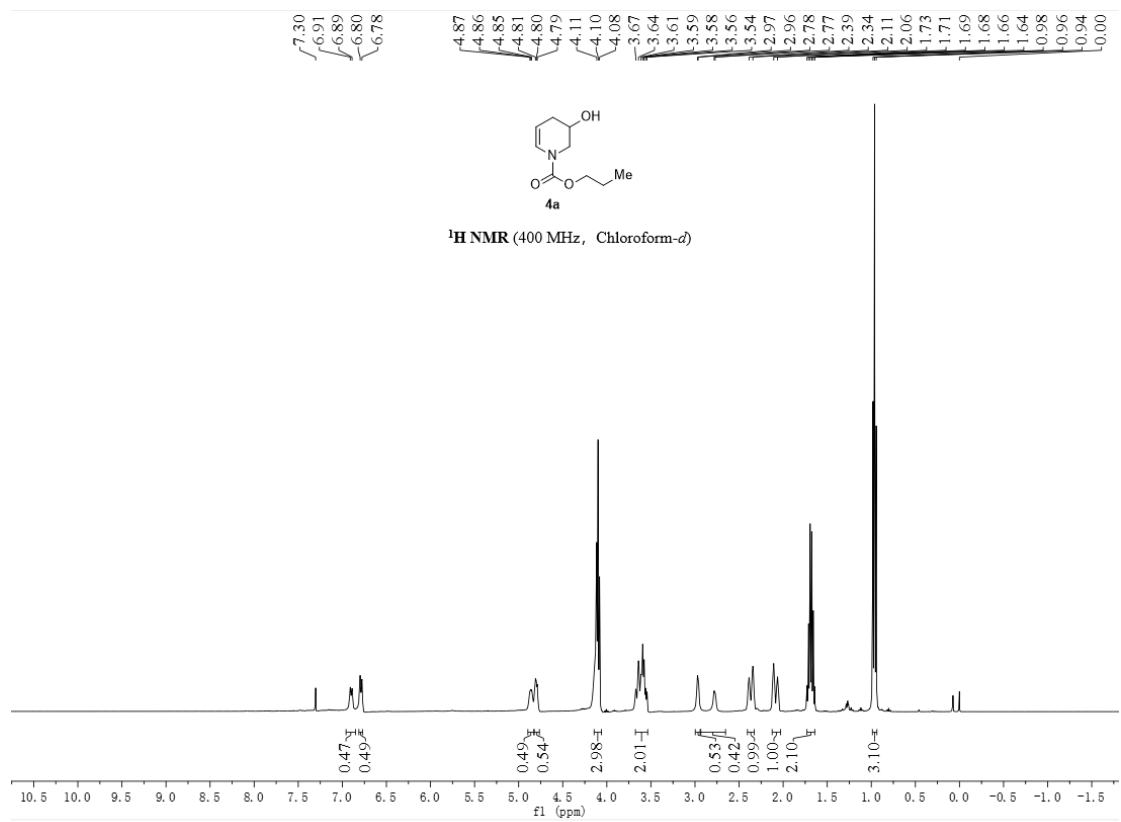

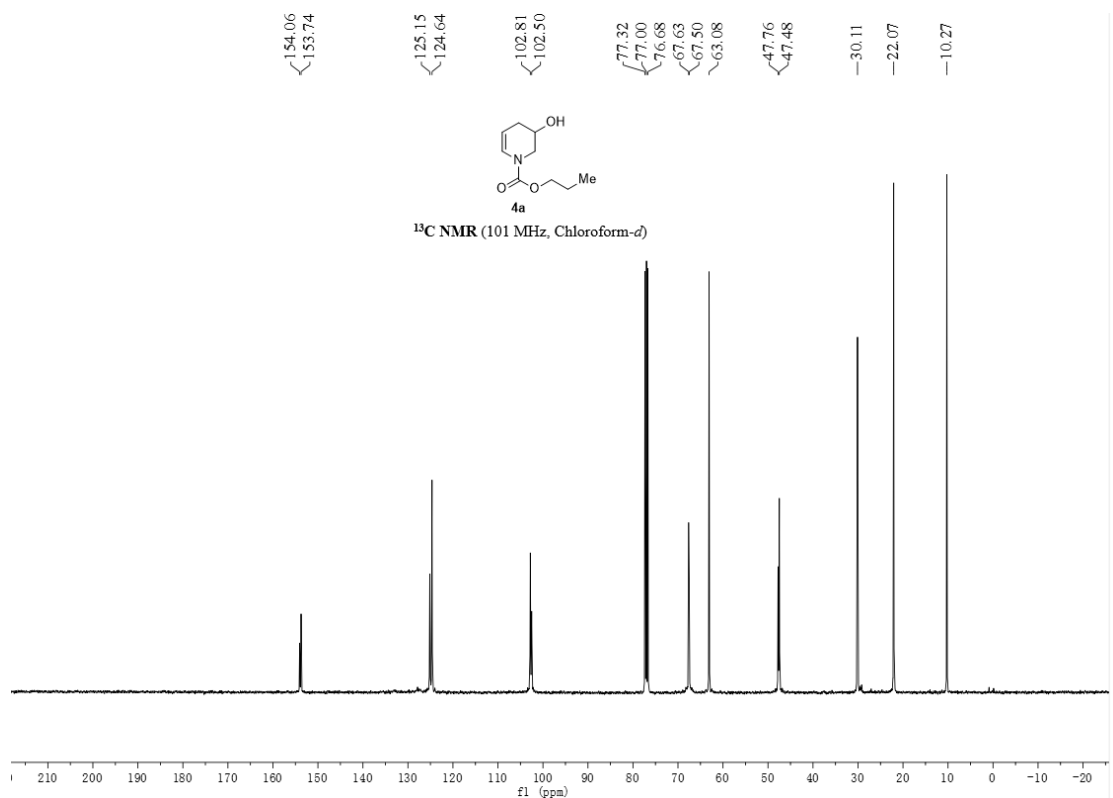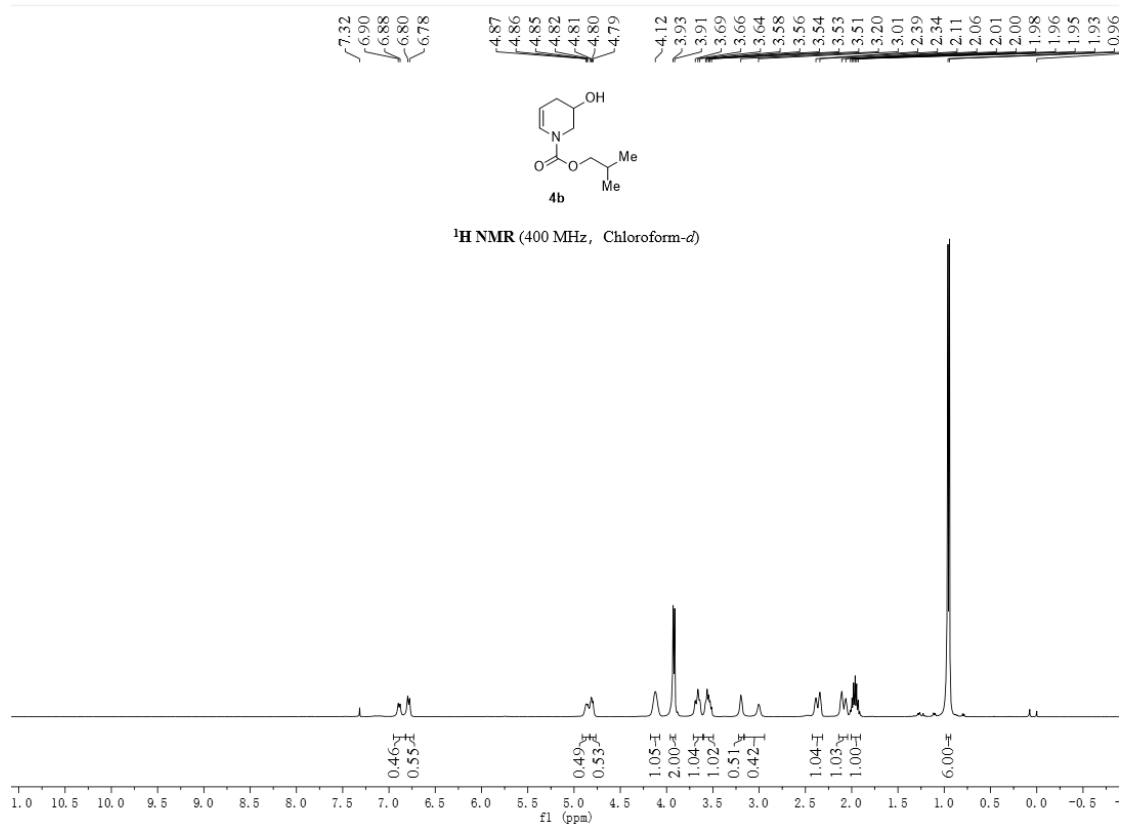

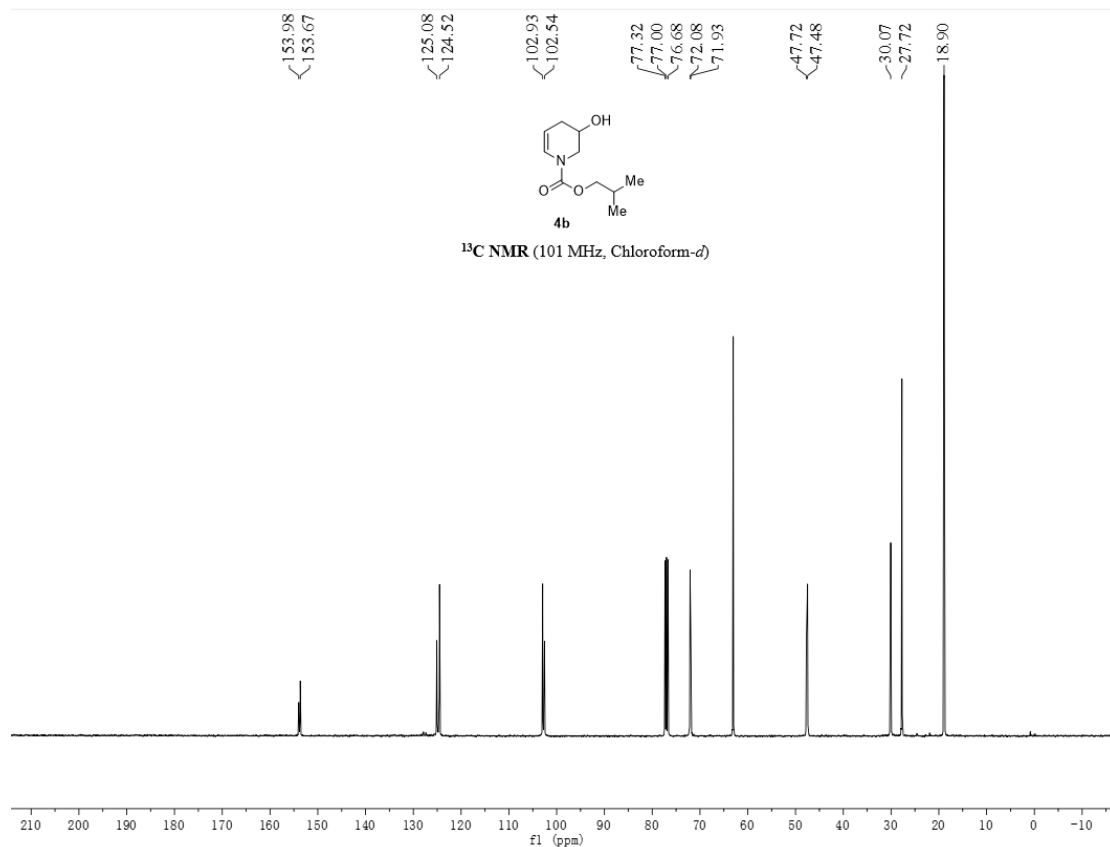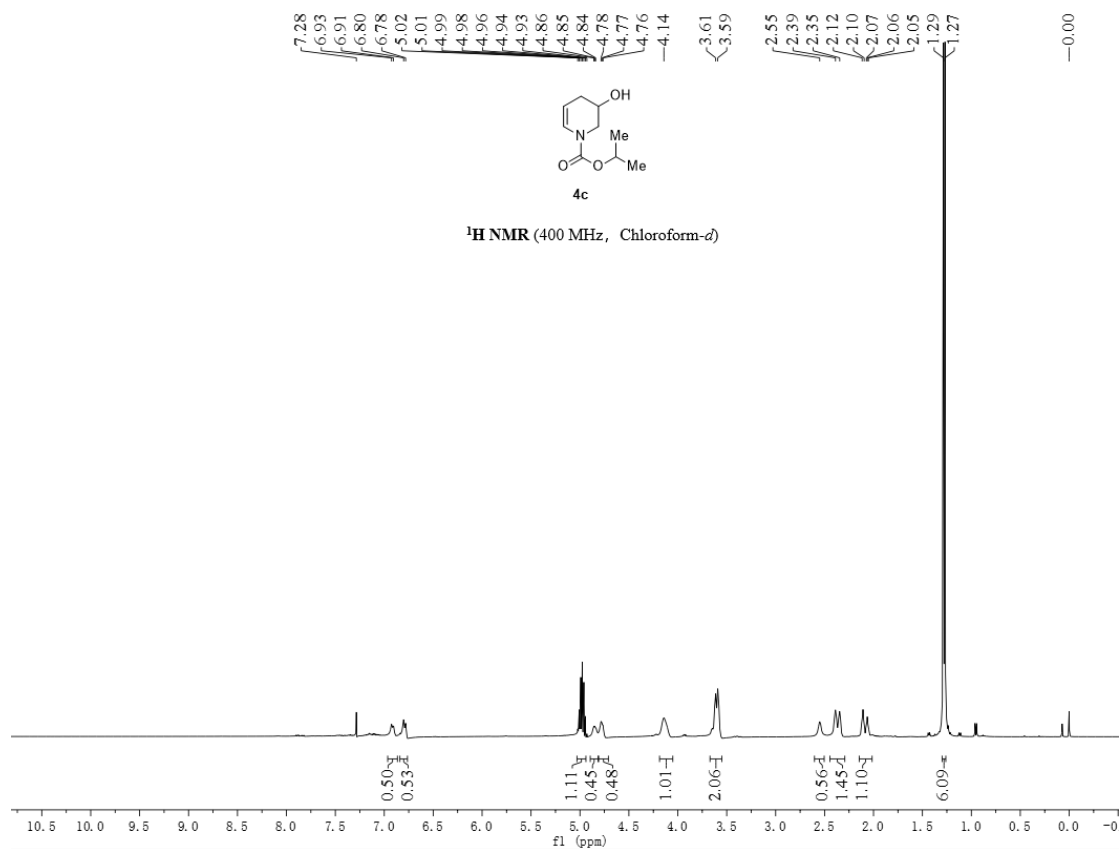

153.63  
153.27

125.30  
124.90

102.30  
102.18

77.32  
77.00  
76.68  
69.68  
63.21

47.81  
47.45

-30.21  
-22.04

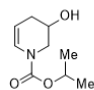

4c

<sup>13</sup>C NMR (101 MHz, Chloroform-*d*)

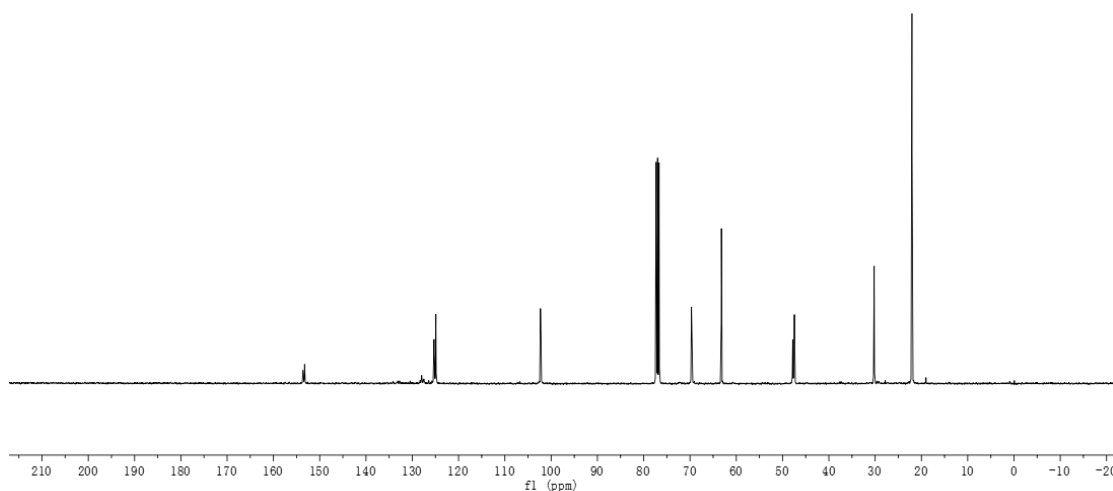

7.39  
7.37  
7.36  
7.26  
7.24  
7.22  
7.14  
7.14  
7.14  
7.13  
7.12  
7.00  
6.99  
6.98  
6.98  
6.95  
6.94  
6.94  
6.93  
6.93

4.98  
4.98  
4.97  
4.96  
4.96  
4.93  
4.93  
4.92  
4.91  
4.91  
4.18  
4.17  
4.17  
4.16  
3.83  
3.82  
3.80  
3.80  
3.77  
3.77  
3.75  
3.75  
3.68  
3.67  
3.67  
2.41  
2.40  
2.39  
2.38  
2.35  
2.14  
2.13  
2.12  
2.11  
2.10  
2.10

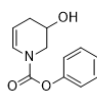

4d

<sup>1</sup>H NMR (600 MHz, Chloroform-*d*)

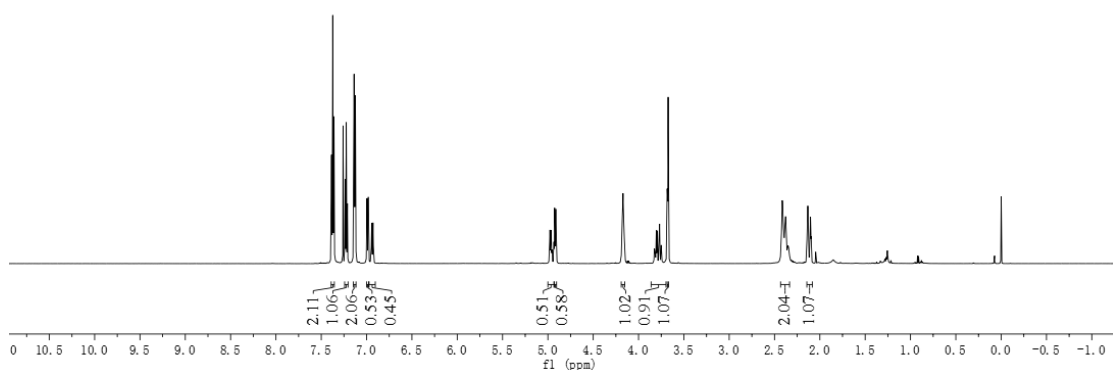

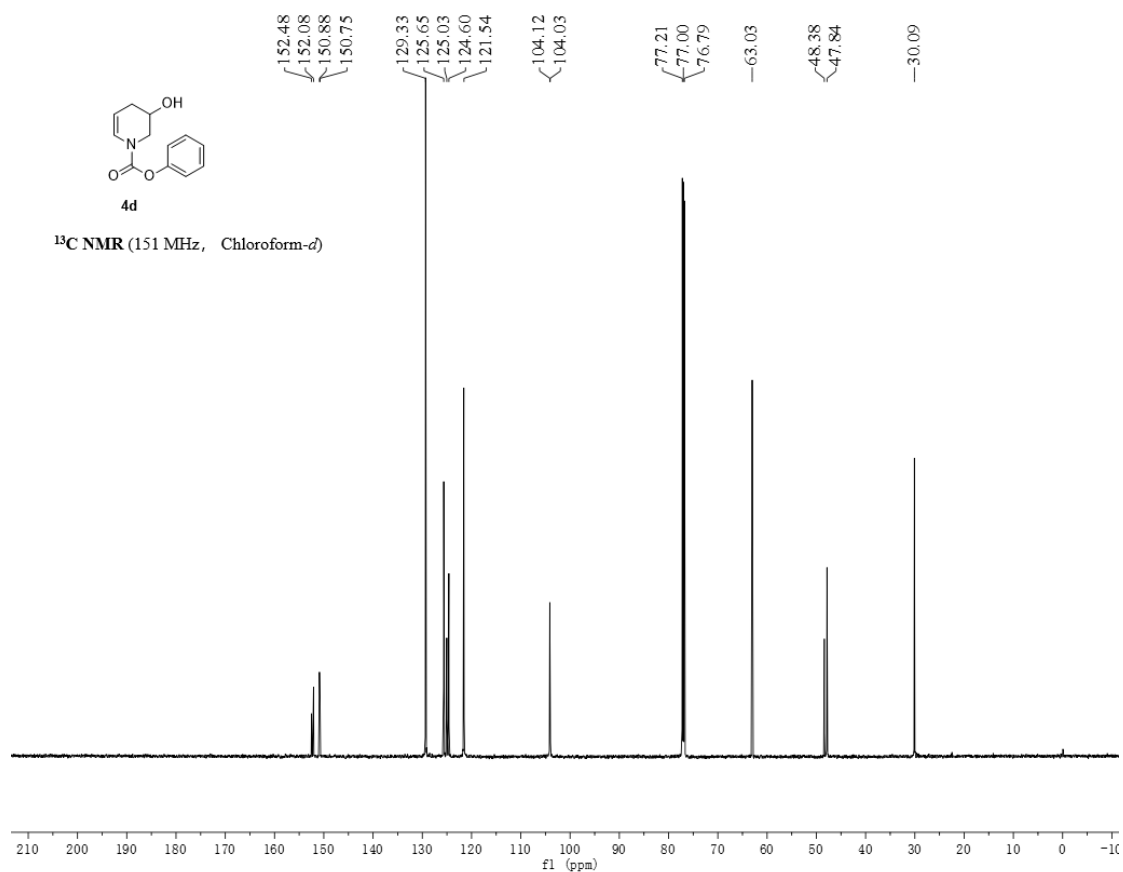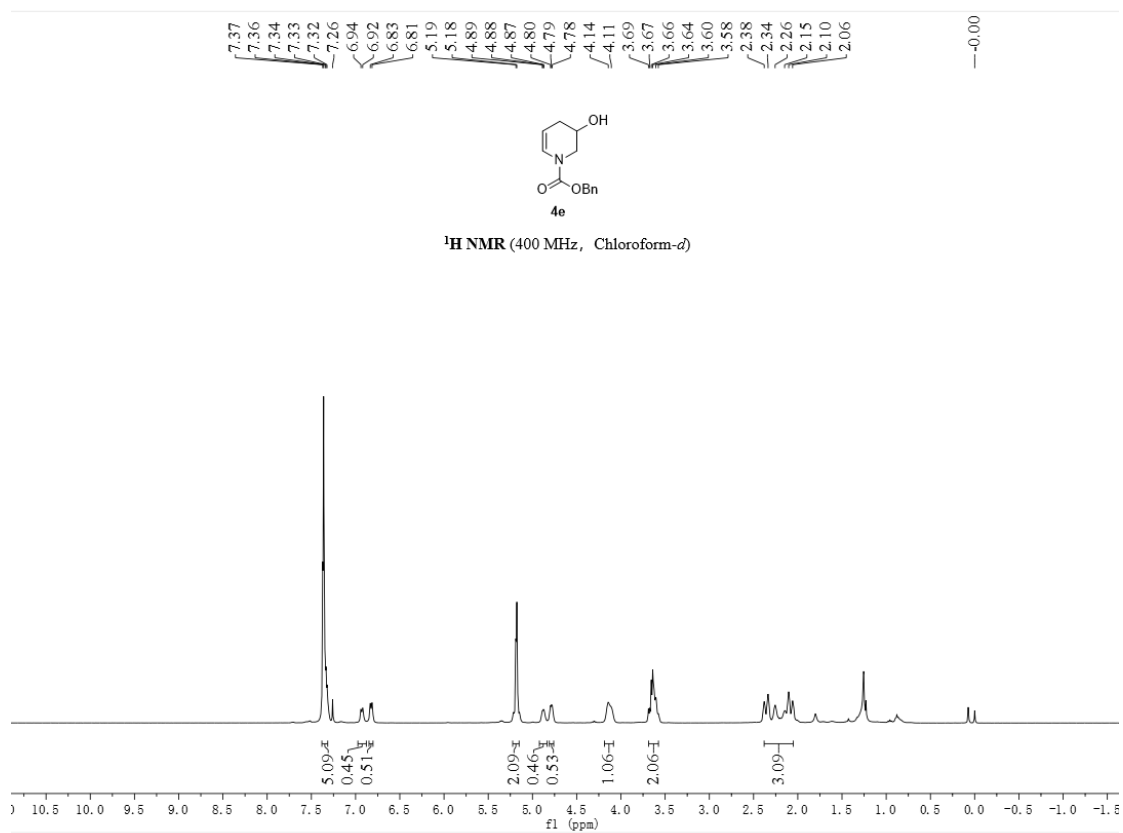



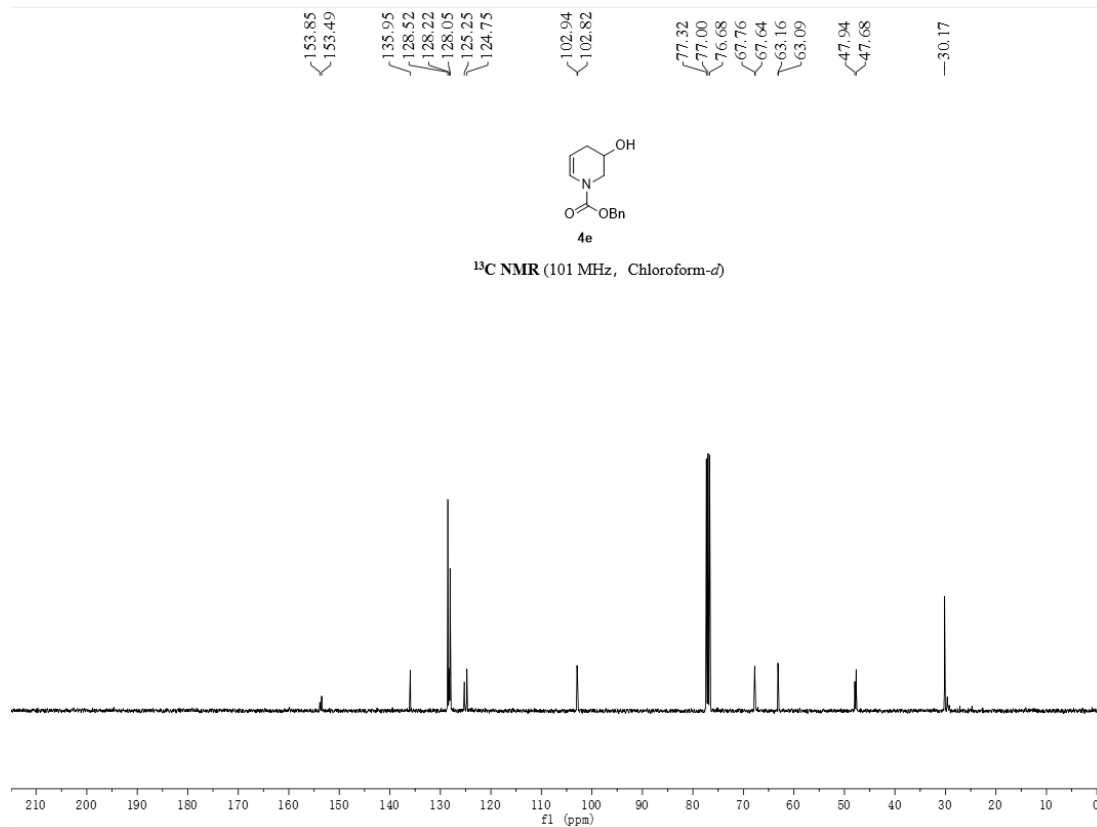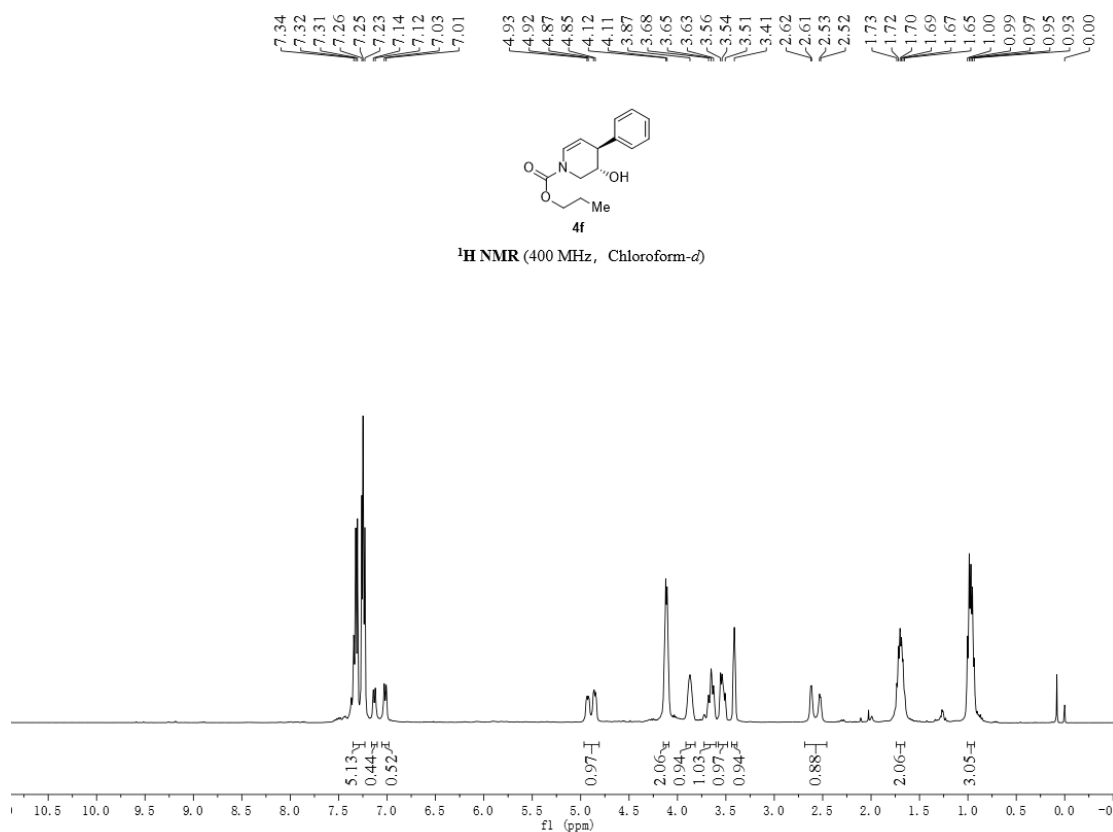

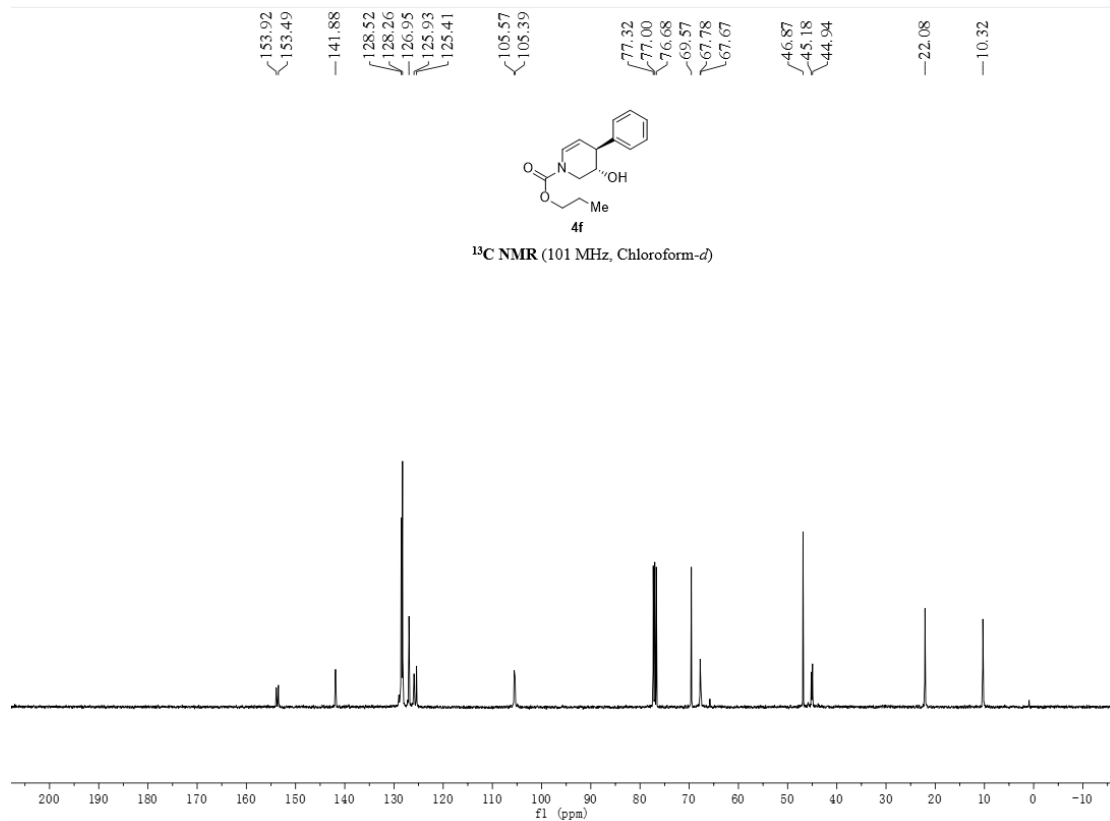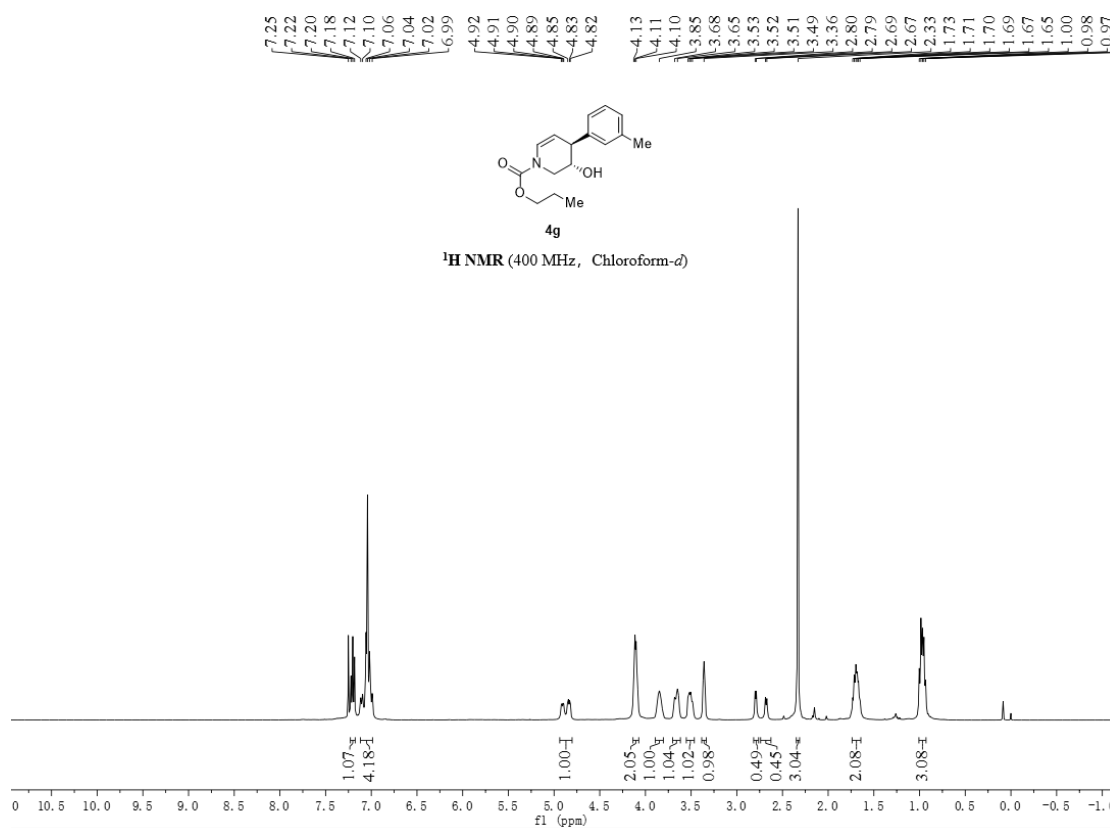

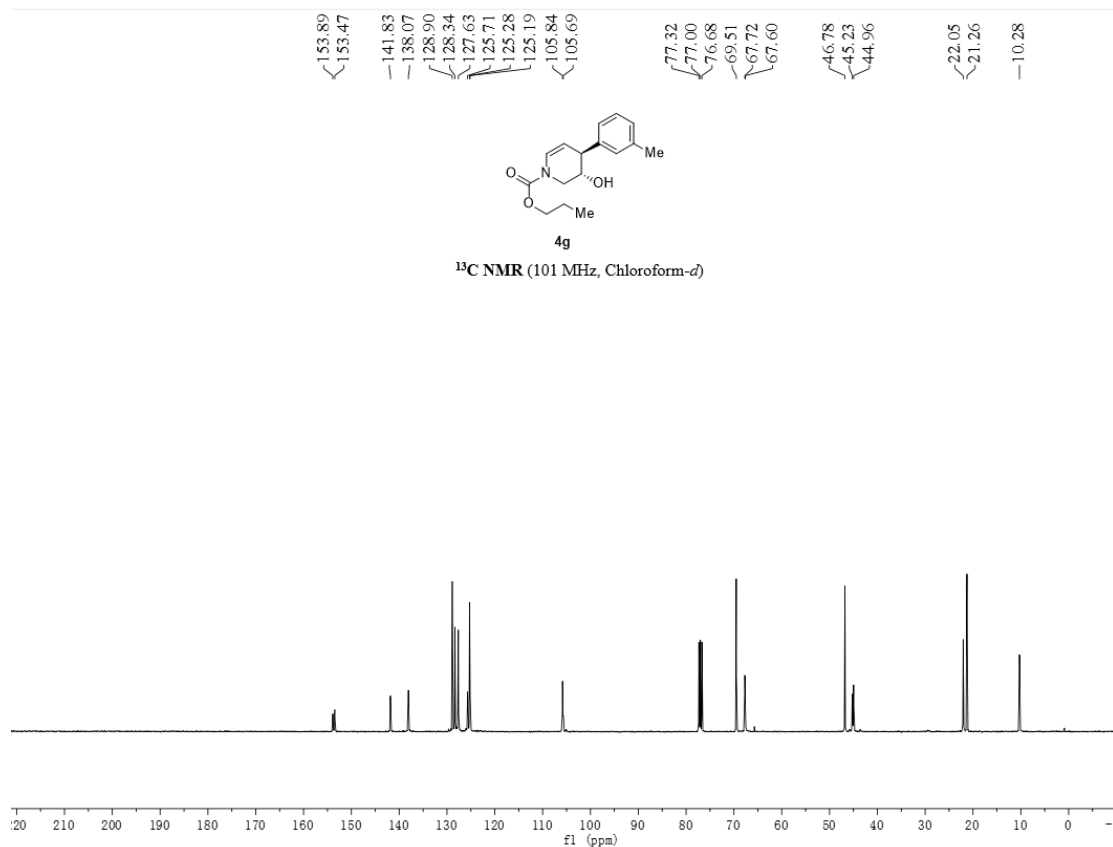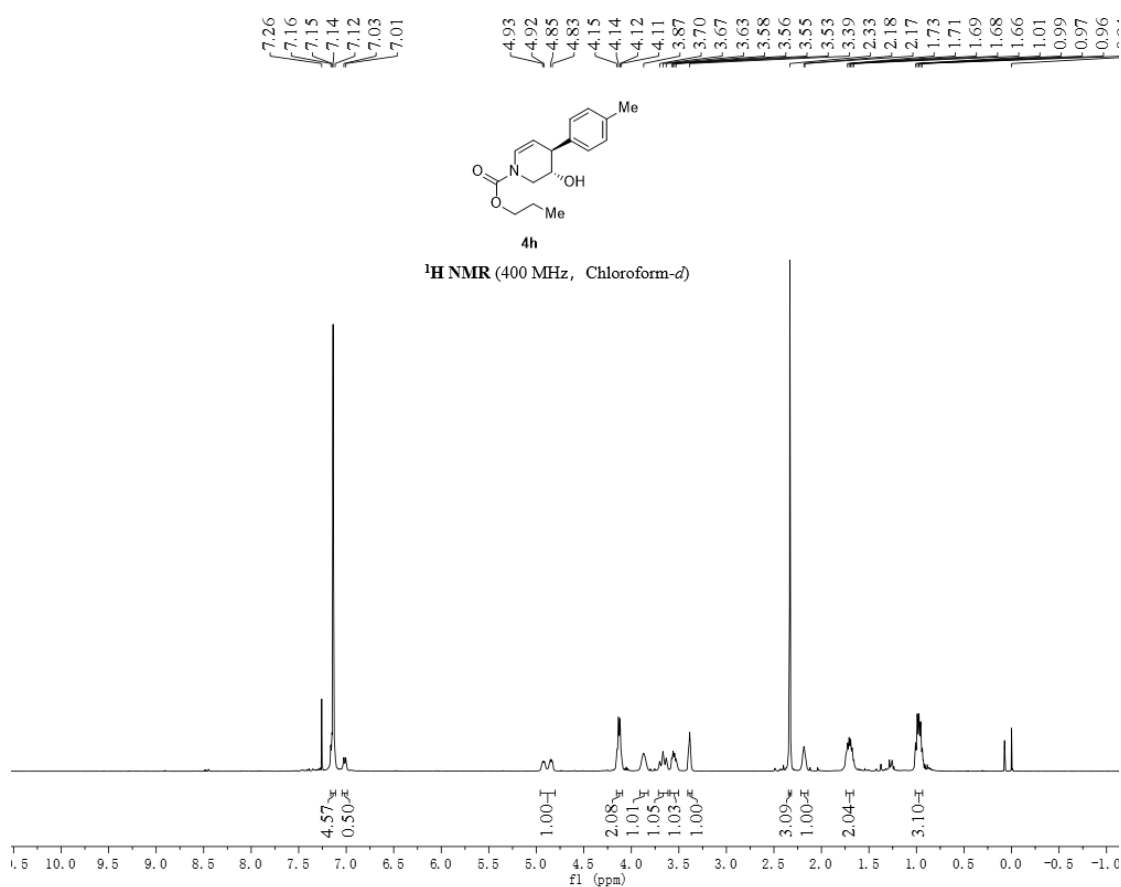

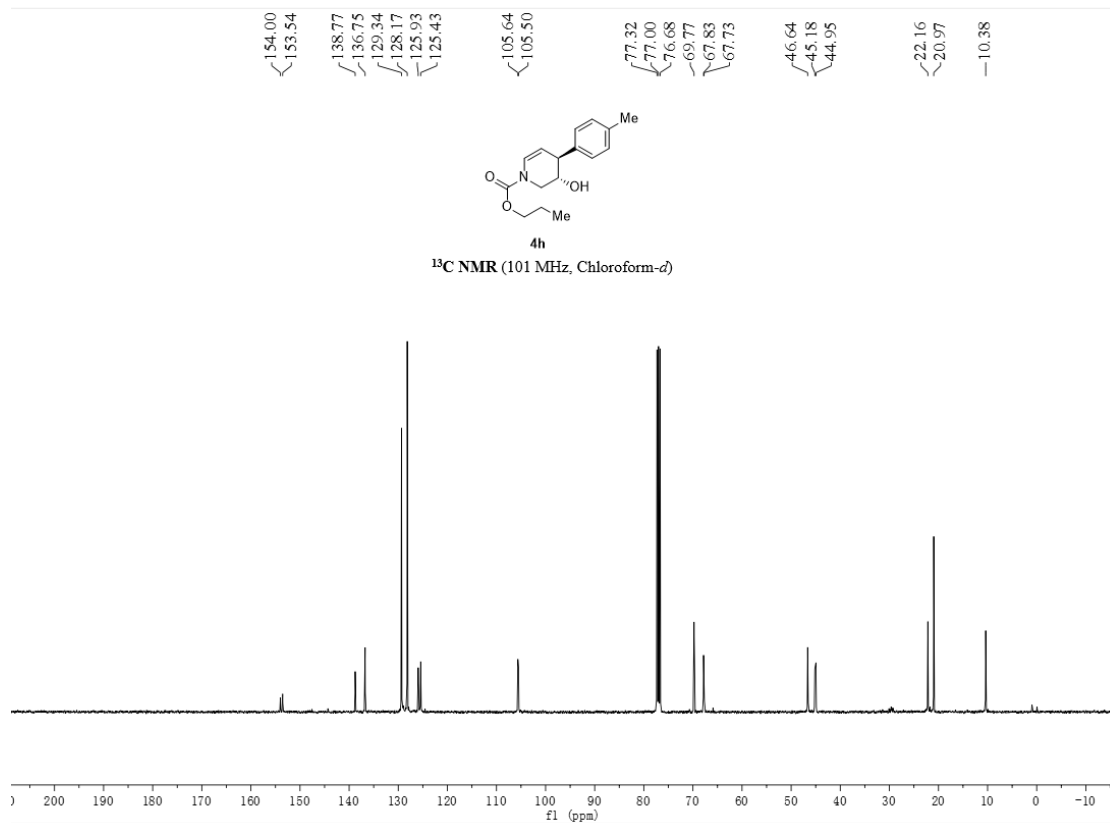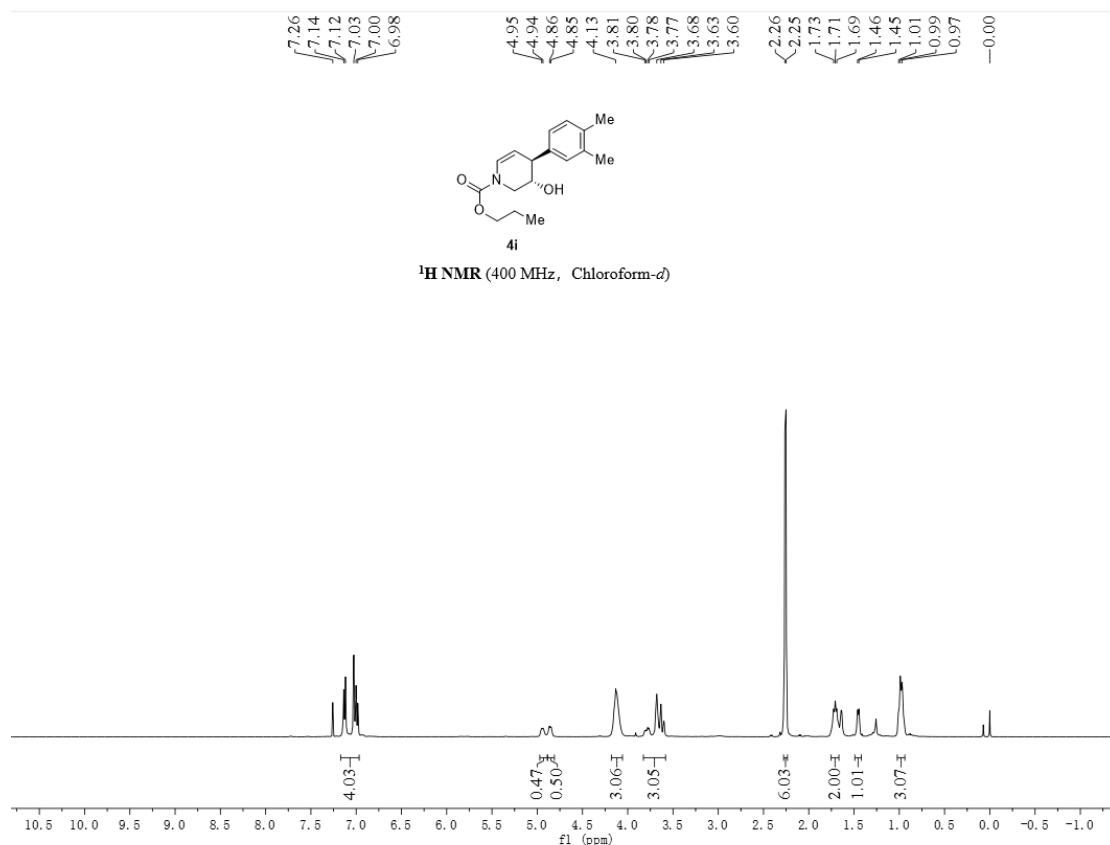

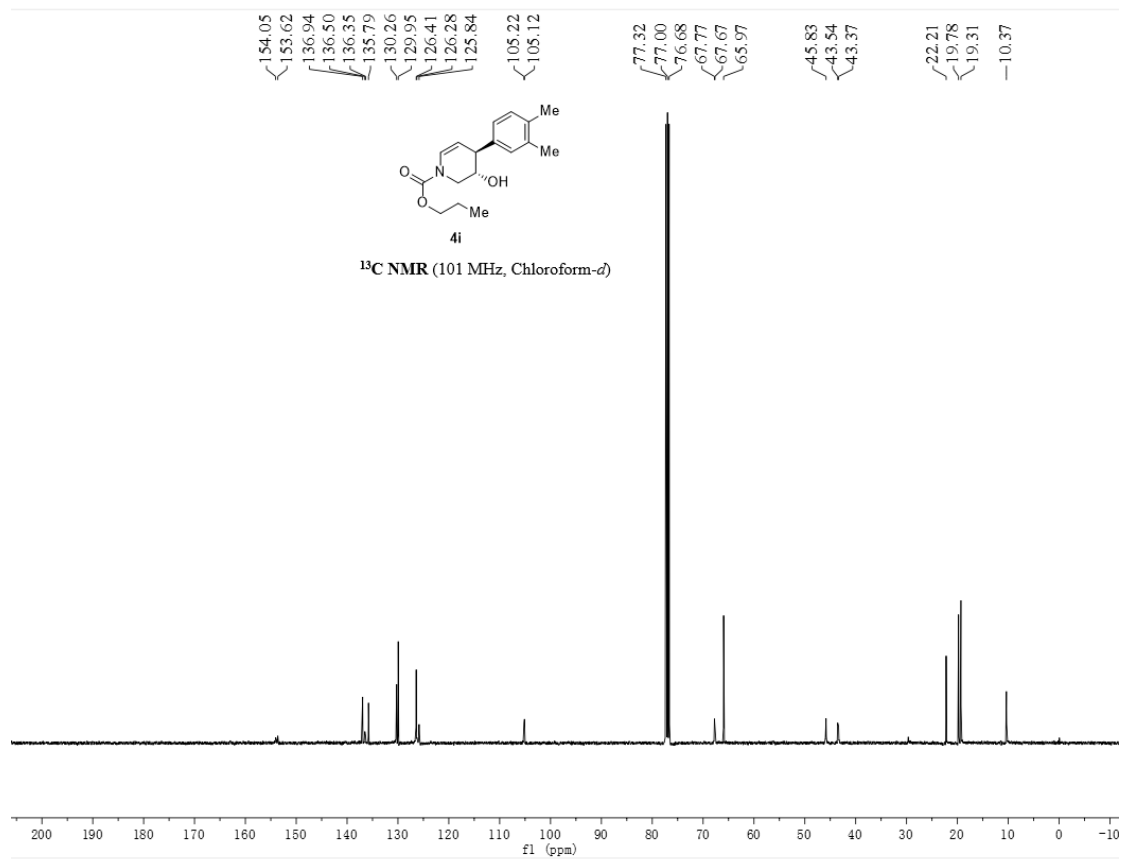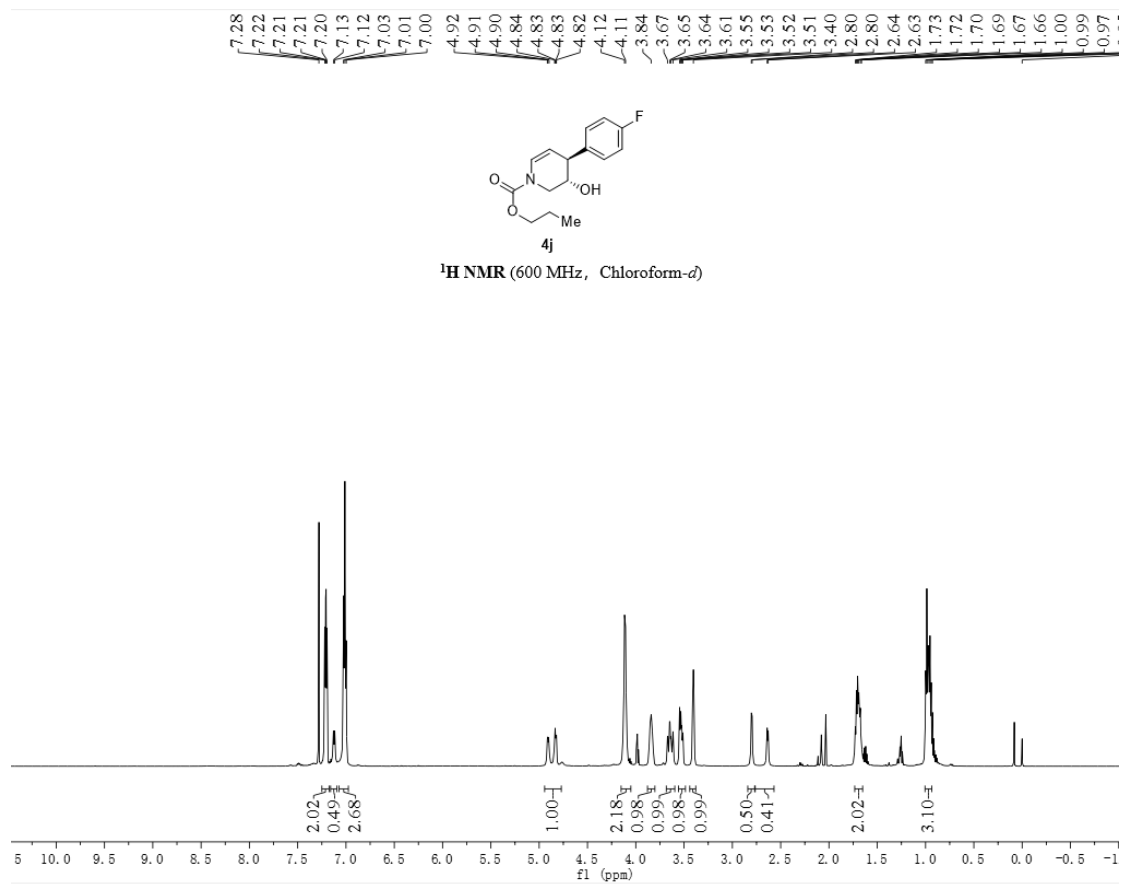

$\delta$  163.03  
 $\delta$  160.59  
 $\delta$  153.92  
 $\delta$  153.50  
 $\delta$  137.62  
 $\delta$  129.77  
 $\delta$  126.08  
 $\delta$  125.55  
 $\delta$  115.42  
 $\delta$  115.21  
 $\delta$  105.49  
 $\delta$  105.22  
 $\delta$  77.32  
 $\delta$  77.00  
 $\delta$  76.68  
 $\delta$  69.60  
 $\delta$  67.87  
 $\delta$  67.76  
 $\delta$  46.09  
 $\delta$  45.15  
 $\delta$  44.98  
 $\delta$  -22.08  
 $\delta$  -10.31

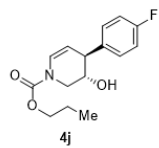

<sup>13</sup>C NMR (101 MHz, Chloroform-*d*)

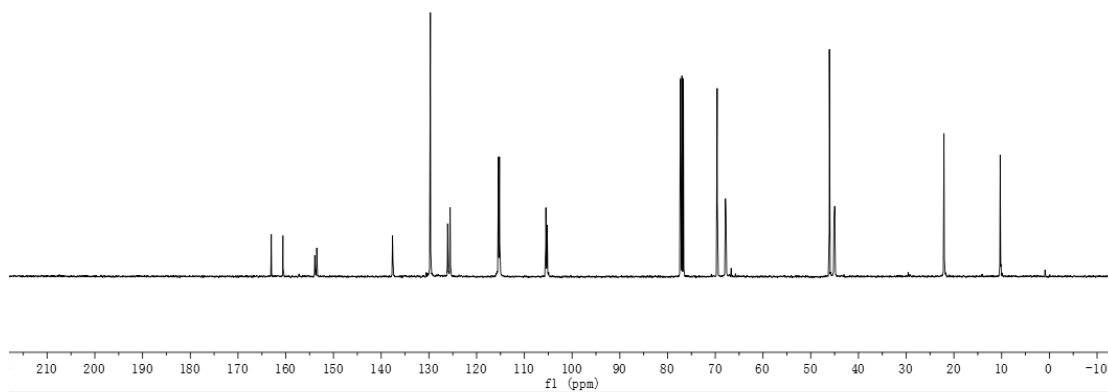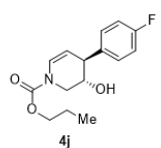

<sup>19</sup>F NMR (376 MHz, Chloroform-*d*)

$\delta$  -115.70

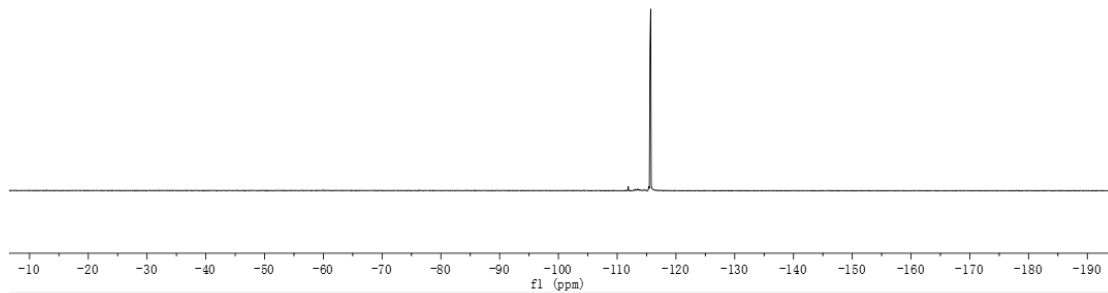

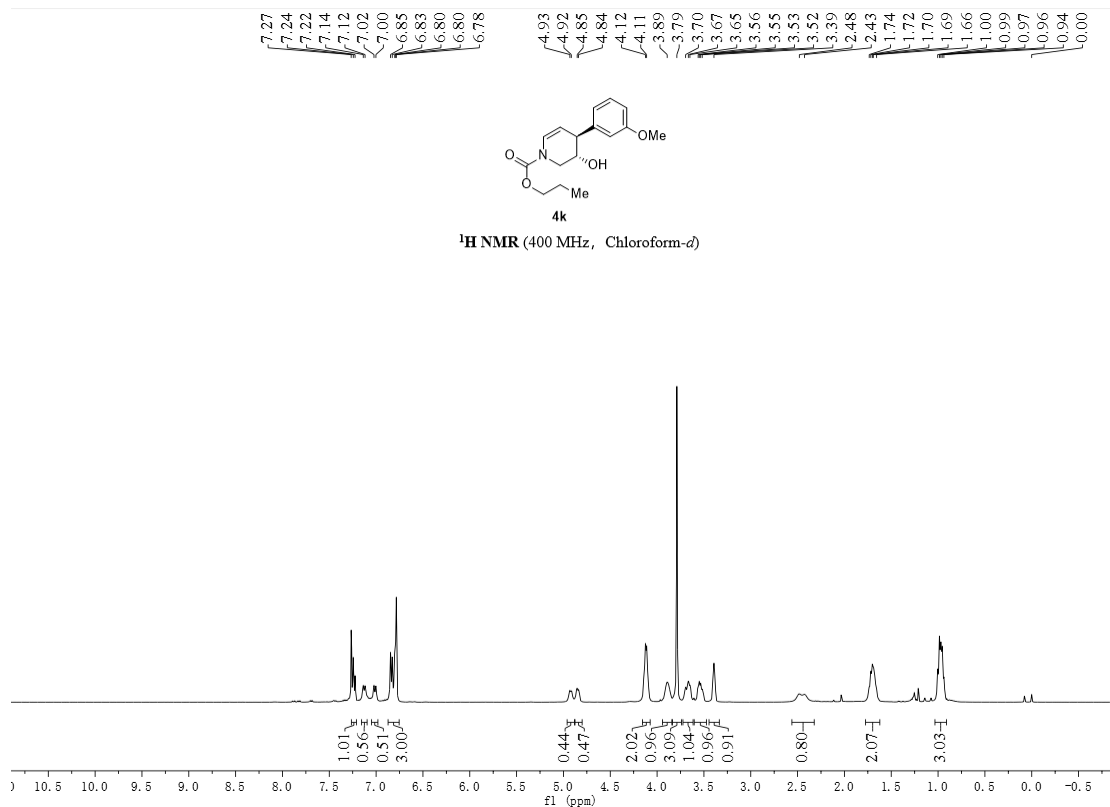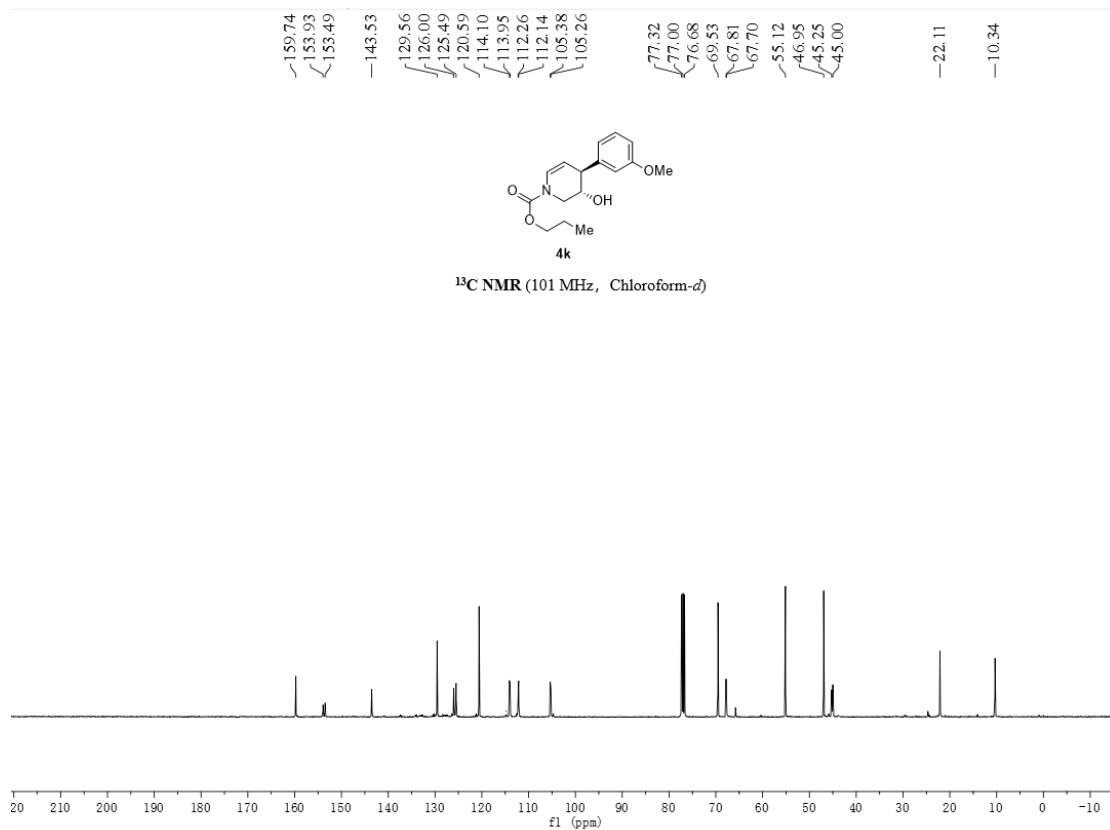

7.44  
7.42  
7.40  
7.38  
7.36  
7.34  
7.32  
7.30  
7.28  
7.26  
7.26  
7.15  
7.13  
7.03  
7.01  
6.92  
6.89  
6.88  
6.86  
5.06  
4.94  
4.93  
4.86  
4.84  
4.14  
3.76  
3.71  
3.63  
3.59  
1.73  
1.71  
1.69  
1.46  
1.44  
0.99  
0.97  
-0.00

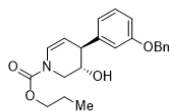

4l

<sup>1</sup>H NMR (400 MHz, Chloroform-*d*)

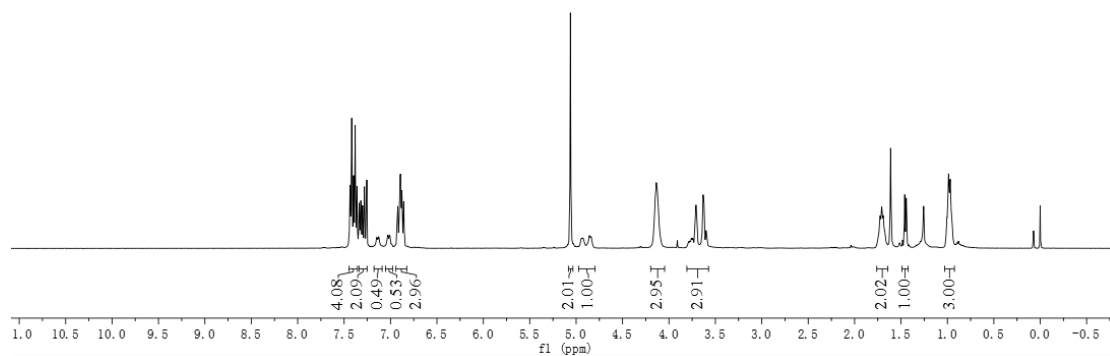

159.09  
153.98  
153.56  
140.84  
136.84  
129.67  
128.58  
128.00  
127.50  
126.54  
126.09  
121.64  
115.89  
113.71  
113.60  
104.69  
77.32  
77.00  
76.68  
70.03  
67.78  
65.94  
45.90  
43.80  
29.67  
22.21  
10.37

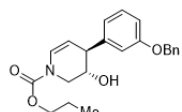

4l

<sup>13</sup>C NMR (101 MHz, Chloroform-*d*)

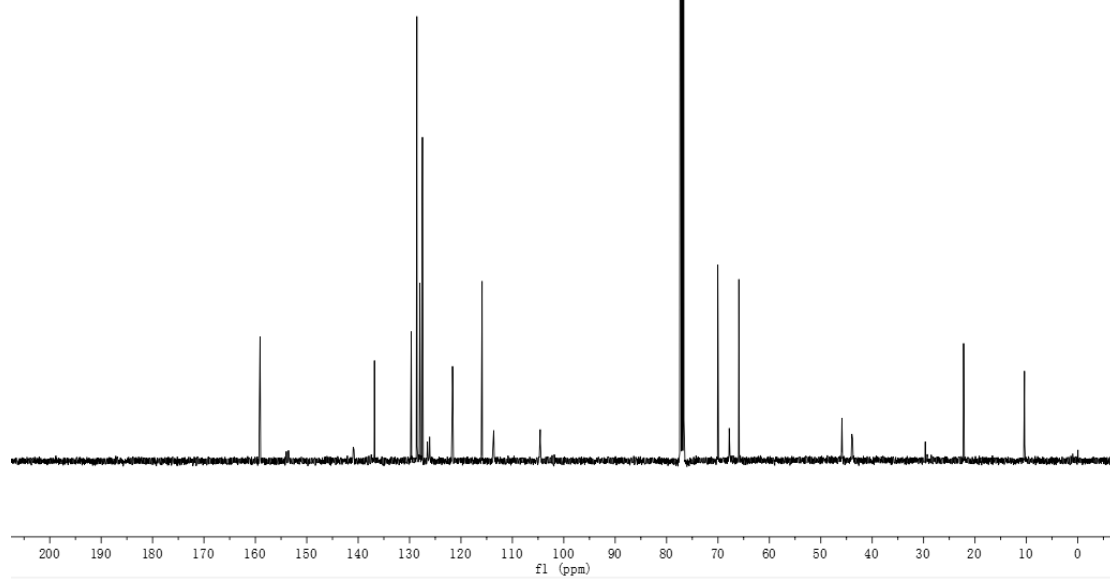



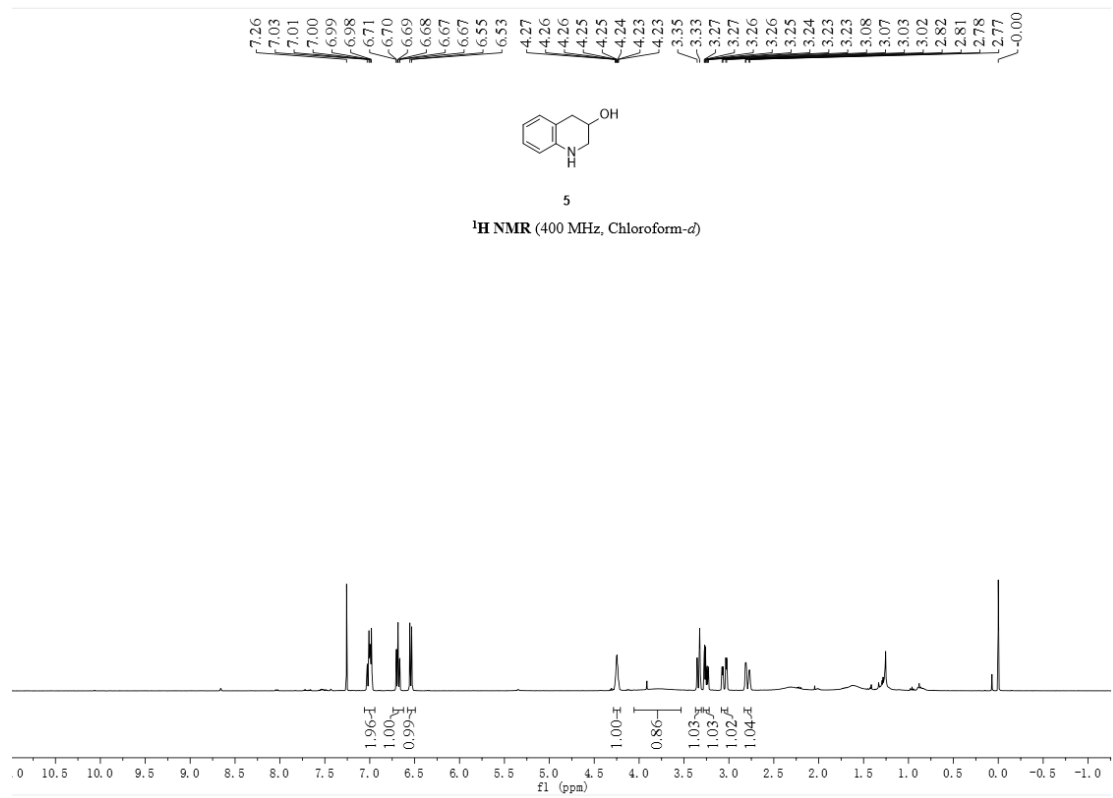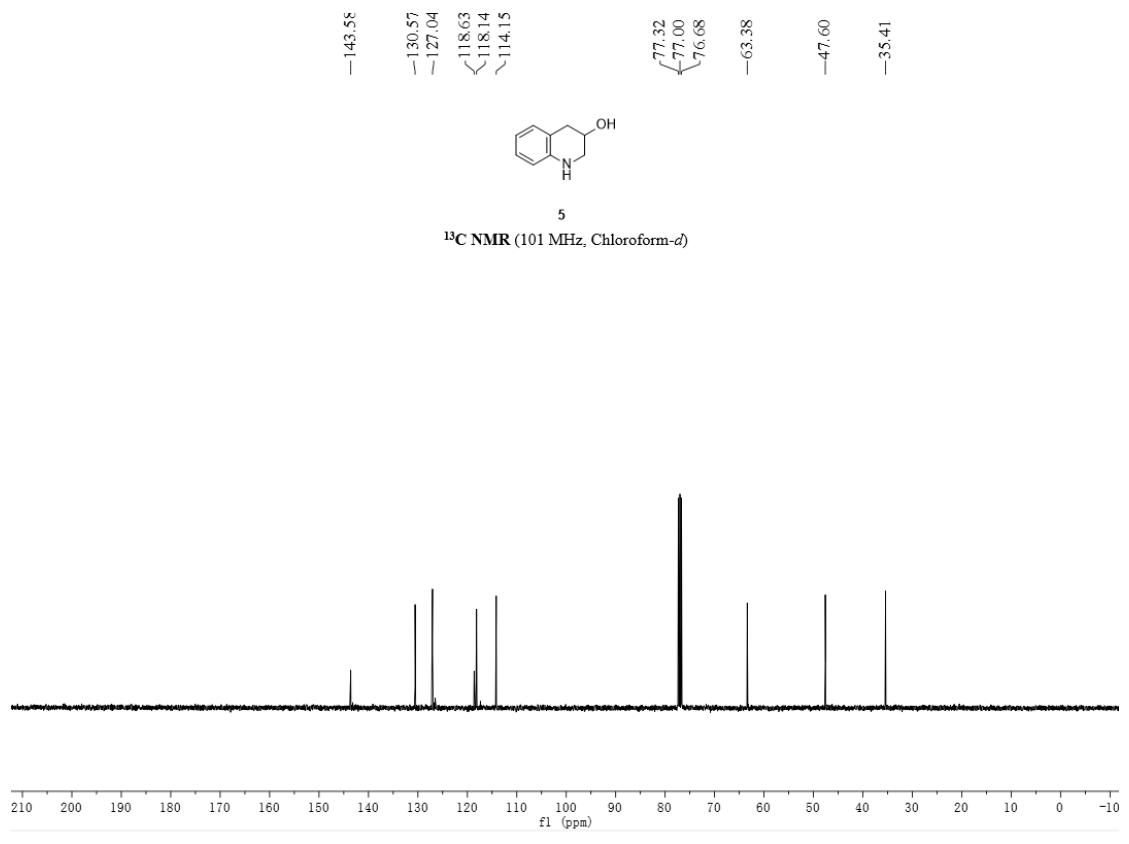

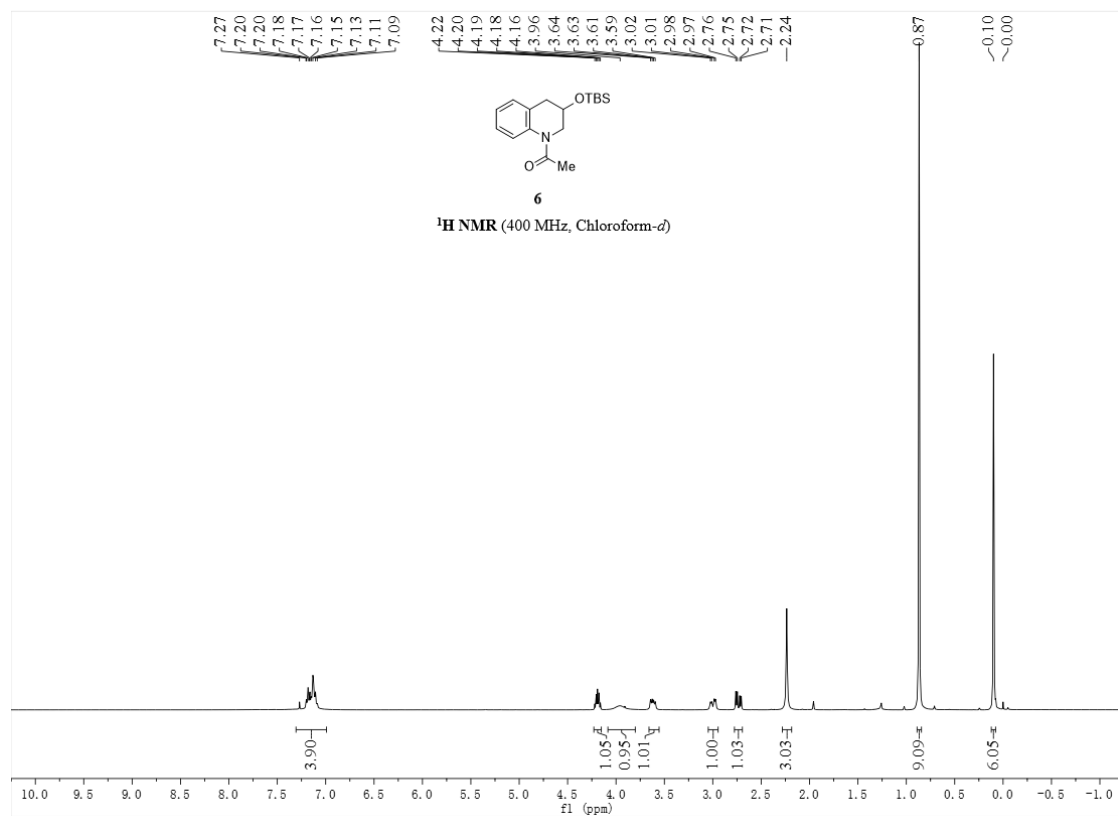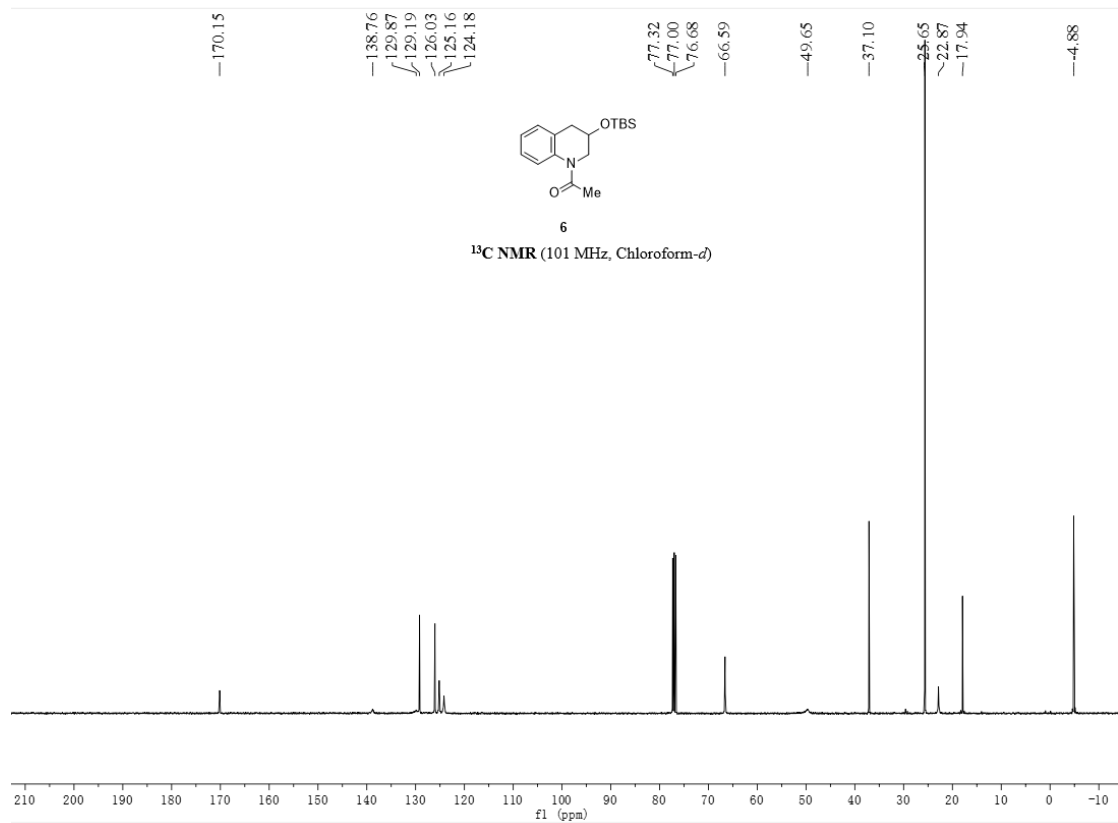

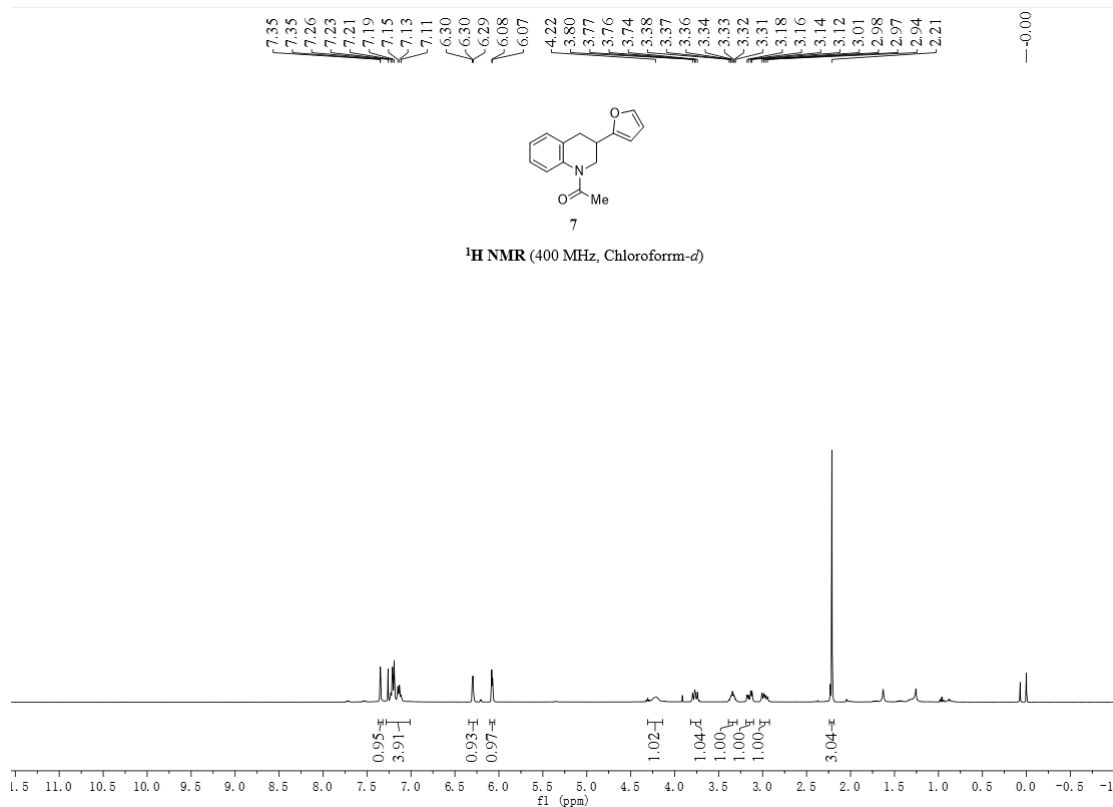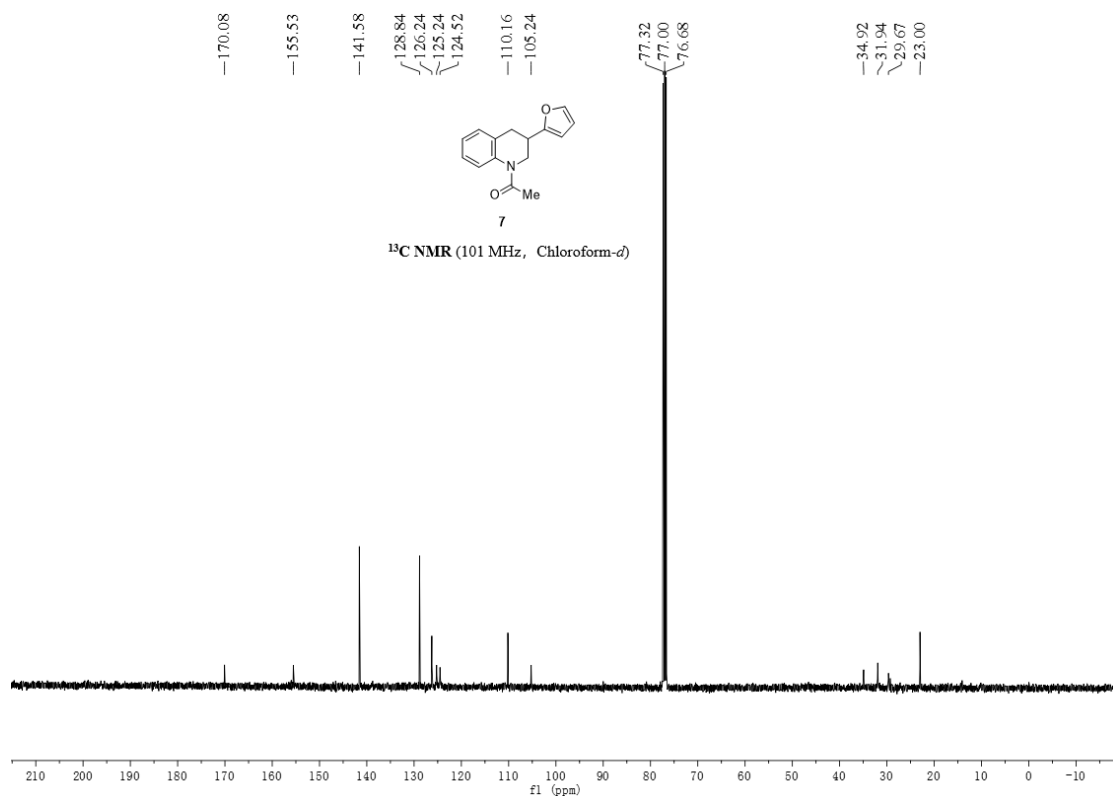

7.28  
7.20  
7.19  
7.17  
7.15  
7.13  
7.11  
7.09  
5.85  
5.83  
5.82  
5.80  
5.79  
5.78  
5.76  
5.16  
5.11  
5.10  
5.08  
4.05  
4.02  
3.49  
3.47  
3.46  
3.44  
2.93  
2.91  
2.88  
2.86  
2.67  
2.64  
2.62  
2.59  
2.24

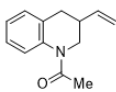

**8**

<sup>1</sup>H NMR (400 MHz, Chloroform-*d*)

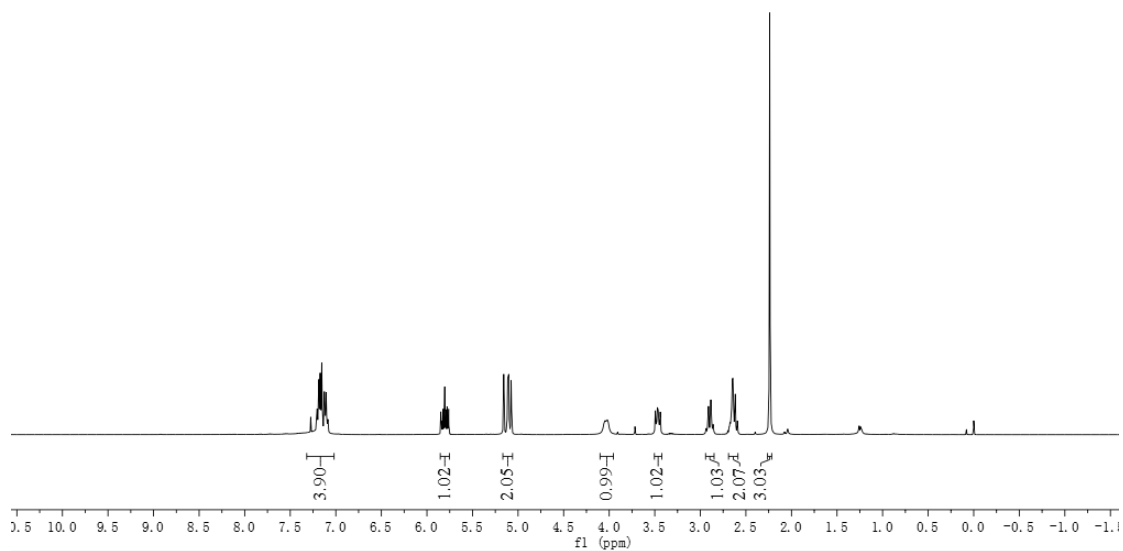

—170.01  
—138.96  
—128.62  
—126.03  
—125.03  
—124.26  
—115.42  
77.32  
77.00  
76.68  
—47.48  
—39.38  
—32.98  
—23.07

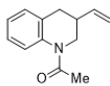

**8**

<sup>13</sup>C NMR (101 MHz, Chloroform-*d*)

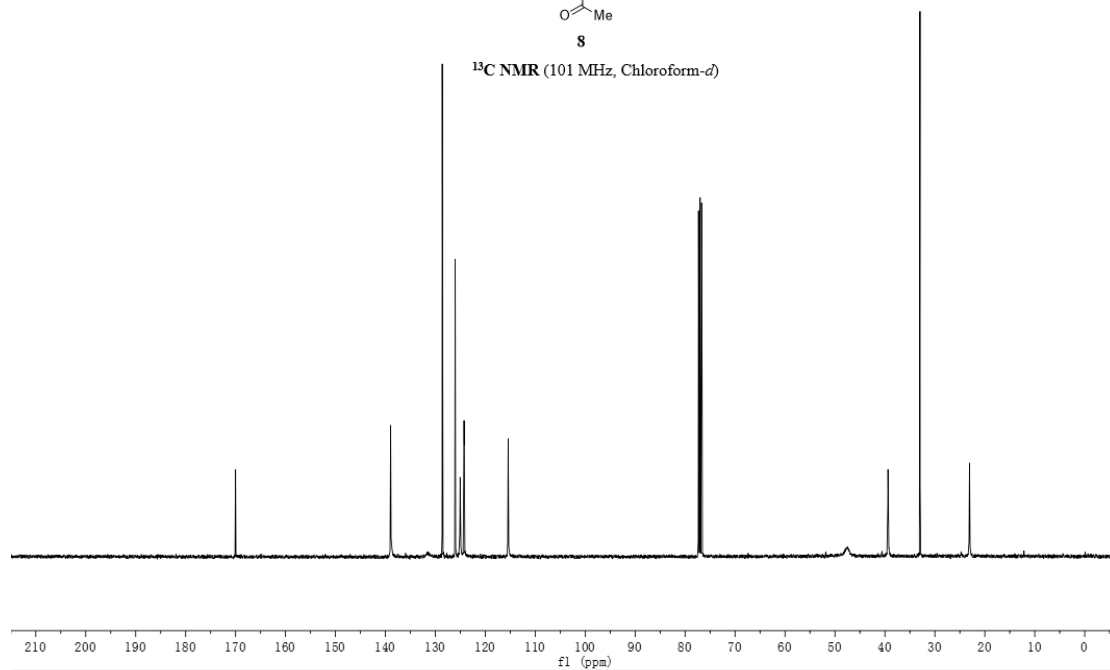

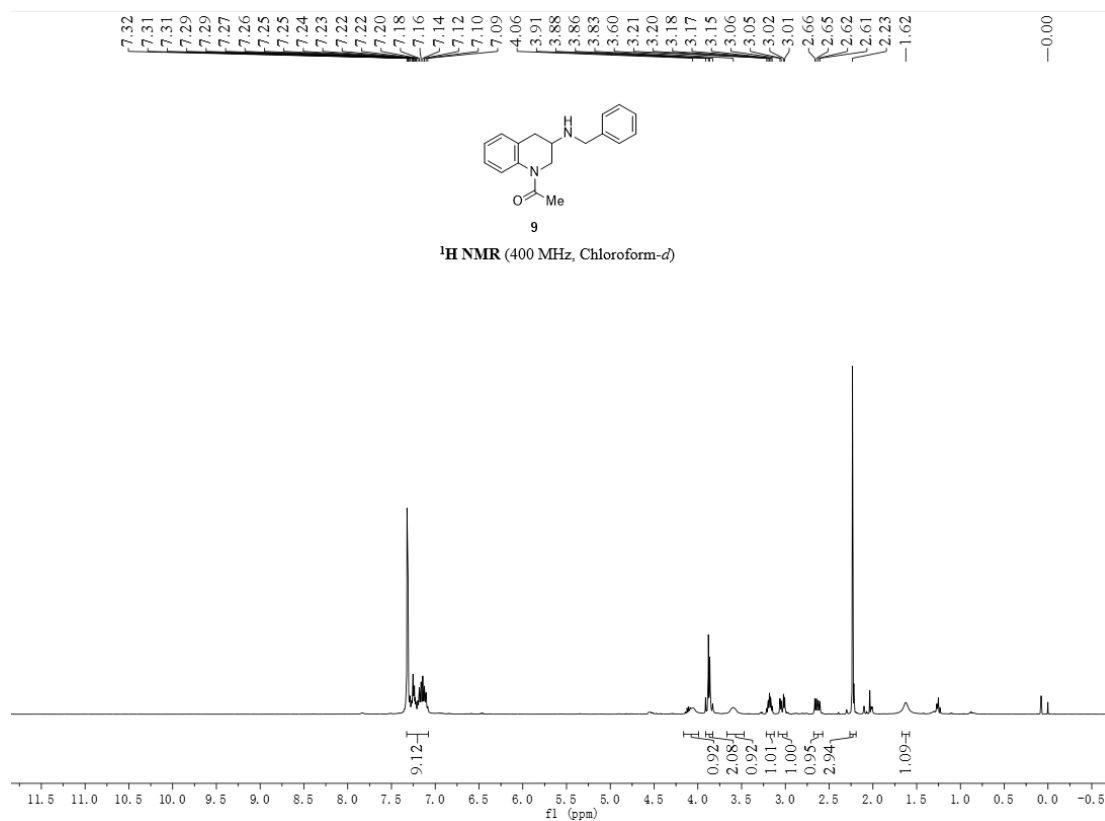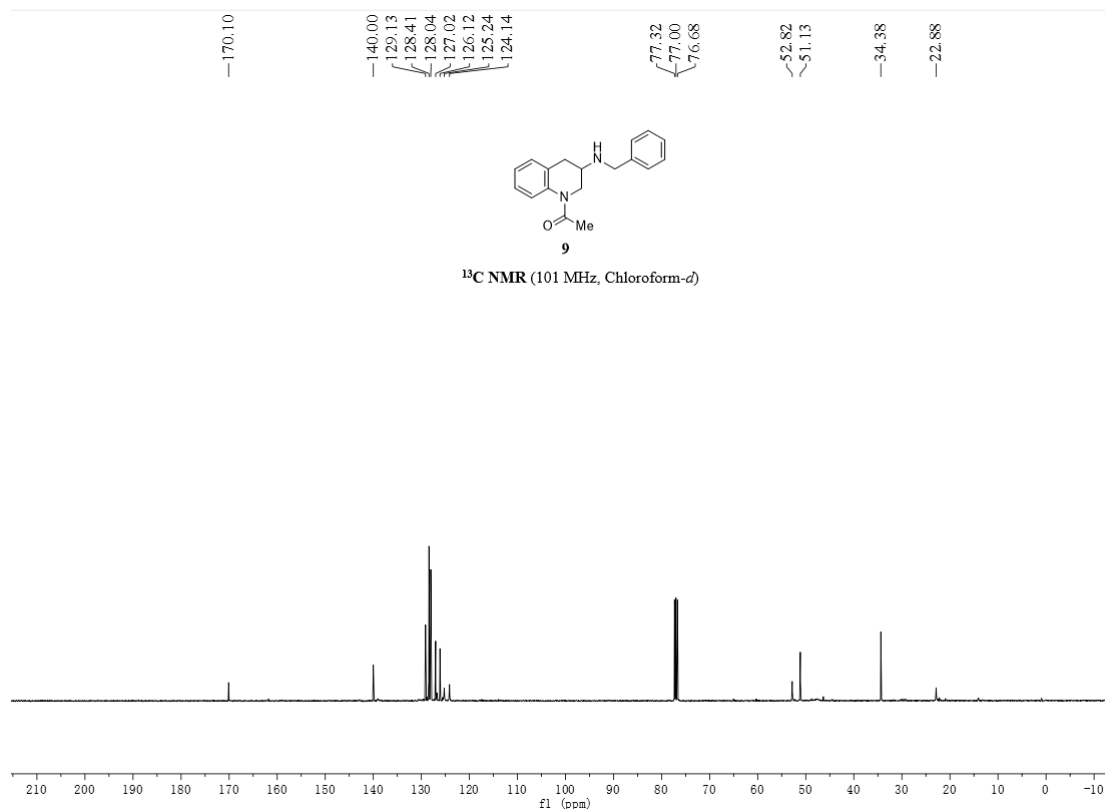

Supplement: d2qo01293f1.pdf [file d2qo01293f1.pdf]
